# Supplementary material for: Modeling Heterogeneity of Triple‐Negative Breast Cancer Uncovers a Novel Combinatorial Treatment Overcoming Primary Drug Resistance
Source: PubMed Central journal article supplement (PMC7856896; doi:10.1002/advs.202003049), 2020-12-16
Supplement: ADVS-8-2003049-s002.pdf [file ADVS-8-2003049-s002.pdf]

**Table S1:** Mammary gland (tumors and controls) used for histopathological and RPPA analyses.

| Mouse #              | Genotype                      | Gross aspect of gland | Histopathological analysis |       |          |                |                    |     | Lung metastases | RPPA (Tumor #) |
|----------------------|-------------------------------|-----------------------|----------------------------|-------|----------|----------------|--------------------|-----|-----------------|----------------|
|                      |                               |                       | Tumor state                | Grade | Necrosis | Prolif. status | ER/PR/HER2 scoring | Met |                 |                |
| 669 201              | <i>MMTV-R26<sup>Met</sup></i> | Tumour                | carcinoma                  | nd    | nd       | nd             | 0                  | nd  | Yes             | Yes (T1)       |
| 669 352              | <i>MMTV-R26<sup>Met</sup></i> | Tumour                | carcinoma                  | nd    | +        | nd             | 0                  | nd  | Yes             | Yes (T2)       |
| 669 713              | <i>MMTV-R26<sup>Met</sup></i> | Tumour                | carcinoma                  | nd    | nd       | nd             | 0                  | nd  | _               | Yes (T3)       |
| 669 163              | <i>MMTV-R26<sup>Met</sup></i> | Tumour                | carcinoma                  | nd    | nd       | nd             | 0                  | nd  | _               | Yes (T4)       |
| 669 789              | <i>MMTV-R26<sup>Met</sup></i> | Tumour                | carcinoma                  | nd    | nd       | nd             | 0                  | nd  | Yes             | Yes (T5)       |
| 669 722              | <i>MMTV-R26<sup>Met</sup></i> | Tumour                | carcinoma                  | nd    | nd       | nd             | 0                  | nd  | Yes             | Yes (T6)       |
| 669 175              | <i>MMTV-R26<sup>Met</sup></i> | Tumour                | carcinoma                  | nd    | nd       | nd             | 0                  | nd  | _               | Yes (T7)       |
| 669 715              | <i>MMTV-R26<sup>Met</sup></i> | Tumour                | carcinoma                  | nd    | nd       | nd             | 0                  | nd  | _               | Yes (T8)       |
| 671 802<br>(Tumor A) | <i>MMTV-R26<sup>Met</sup></i> | Tumour                | carcinoma                  | 3     | +        | 3              | 0                  | +   | _               | Yes (T9)       |
| 671 607              | <i>MMTV-R26<sup>Met</sup></i> | Tumour                | carcinoma                  | 3     | +        | 3              | 0                  | +   | _               | Yes (T10)      |
| 671 662              | <i>MMTV-R26<sup>Met</sup></i> | Tumour                | carcinoma                  | 3     | ++       | 2              | 0                  | +   | _               | Yes (T11)      |
| 671 670              | <i>MMTV-R26<sup>Met</sup></i> | Tumour                | carcinoma                  | 3     | +(+)     | 3              | 0                  | +   | Yes             | Yes (T12)      |
| 671 975              | <i>MMTV-R26<sup>Met</sup></i> | Tumour                | carcinoma                  | 2     | _        | 1              | 0                  | +   | _               | Yes (T13)      |
| 672 961              | <i>MMTV-R26<sup>Met</sup></i> | Tumour                | carcinoma                  | 3     | ++       | 3              | 0                  | +   | _               | Yes (T14)      |
| 671 711              | <i>MMTV-R26<sup>Met</sup></i> | Tumour                | carcinoma                  | 3     | ++       | 2              | 0                  | +   | _               | Yes (T15)      |
| 672 046              | <i>MMTV-R26<sup>Met</sup></i> | Tumour                | carcinoma                  | 3     | _        | 2              | 0                  | +   | _               | Yes (T16)      |
| 671 893              | <i>MMTV-R26<sup>Met</sup></i> | Tumour                | carcinoma                  | 3     | _        | 2              | 0                  | +   | Yes             | Yes (T17)      |
| 672 867              | <i>MMTV-R26<sup>Met</sup></i> | Tumour                | carcinoma                  | 3     | +        | 2              | 0                  | +   | _               | Yes (T18)      |
| 672 790              | <i>MMTV-R26<sup>Met</sup></i> | Tumour                | carcinoma                  | 2     | _        | 2              | 0                  | +   | _               | Yes (T19)      |
| 672 955              | <i>MMTV-R26<sup>Met</sup></i> | Tumour                | carcinoma                  | 2-3   | +        | 2              | 0                  | +   | _               | Yes (T20)      |
| 672 941              | <i>MMTV-R26<sup>Met</sup></i> | Tumour                | carcinoma                  | 3     | _        | 2              | 0                  | +   | _               | Yes (T23)      |

|                      |                               |        |           |    |    |    |    |    |    |   |           |
|----------------------|-------------------------------|--------|-----------|----|----|----|----|----|----|---|-----------|
| 672 876              | <i>MMTV-R26<sup>Met</sup></i> | Tumour | nd        | nd | nd | nd | nd | nd | nd | – | Yes (T21) |
| 672 302              | <i>MMTV-R26<sup>Met</sup></i> | Tumour | nd        | nd | nd | nd | nd | nd | nd | – | Yes (T22) |
| 672 870              | <i>MMTV-R26<sup>Met</sup></i> | Tumour | nd        | nd | nd | nd | nd | nd | nd | – | Yes (T24) |
| 671 509              | <i>MMTV-R26<sup>Met</sup></i> | Tumour | carcinoma | 3  | +  | 2  | 0  | +  | –  | – | –         |
| 671 802<br>(Tumor B) | <i>MMTV-R26<sup>Met</sup></i> | Tumour | carcinoma | 3  | –  | 1  | 0  | +  | –  | – | –         |
| 672 802              | <i>MMTV-R26<sup>Met</sup></i> | Tumour | carcinoma | 3  | +  | 2  | 0  | +  | –  | – | –         |
| 669 527              | <i>MMTV-R26<sup>Met</sup></i> | Tumour | carcinoma | nd | nd | nd | nd | nd | nd | – | –         |
| 669 355              | <i>MMTV-R26<sup>Met</sup></i> | Tumour | carcinoma | nd | nd | nd | nd | nd | nd | – | –         |
| 669 717              | <i>MMTV-R26<sup>Met</sup></i> | Tumour | carcinoma | nd | nd | nd | nd | nd | nd | – | –         |
| 669 854              | <i>MMTV-R26<sup>Met</sup></i> | Tumour | carcinoma | nd | nd | nd | nd | nd | nd | – | –         |
| 671 720              | <i>MMTV-R26<sup>Met</sup></i> | Tumour | nd        | nd | nd | nd | nd | nd | nd | – | –         |
| 672 246              | <i>MMTV-R26<sup>Met</sup></i> | Tumour | nd        | nd | nd | nd | nd | nd | nd | – | –         |
| 671 594              | <i>MMTV</i>                   | Normal | –         | nd | –  | nd | nd | –  | –  | – | Yes (N1)  |
| 671 600              | <i>MMTV</i>                   | Normal | –         | nd | –  | nd | nd | –  | –  | – | Yes (N2)  |
| 672 603              | <i>MMTV-R26<sup>Met</sup></i> | Normal | –         | nd | –  | nd | nd | nd | –  | – | Yes (N3)  |
