# Supplementary material for: Modeling Heterogeneity of Triple‐Negative Breast Cancer Uncovers a Novel Combinatorial Treatment Overcoming Primary Drug Resistance
Source: PubMed Central journal article supplement (PMC7856896; doi:10.1002/advs.202003049), 2020-12-16
Supplement: ADVS-8-2003049-s003.pdf [file ADVS-8-2003049-s003.pdf]

**Table S2:** Antibodies used for RPPA analysis of *MMTV-R26<sup>Met</sup>* tumors and cells

| #  | Official Ab Name                     | Ab Name Reported on Dataset | Gene Name  | Company             | Catalog #           | Species | RPPA Dilution |
|----|--------------------------------------|-----------------------------|------------|---------------------|---------------------|---------|---------------|
| 1  | 14-3-3 beta                          | 14-3-3-beta                 | YWHAB      | Santa Cruz          | sc-628              | Rabbit  | 1:75          |
| 2  | 14-3-3 epsilon                       | 14-3-3-epsilon              | YWHAE      | Santa Cruz          | SC-23957            | Mouse   | 1:50          |
| 3  | 14-3-3 zeta                          | 14-3-3-zeta                 | YWHAZ      | Santa Cruz          | sc-1019             | Rabbit  | 1:5000        |
| 4  | 4E-BP1                               | 4E-BP1                      | EIF4EBP1   | CST                 | 9452                | Rabbit  | 1:100         |
| 5  | 4E-BP1 (phospho S65)                 | 4E-BP1_pS65                 | EIF4EBP1   | CST                 | 9456                | Rabbit  | 1:250         |
| 6  | 4E-BP1 (phospho T37/46)              | 4E-BP1-pT37-T46             | EIF4EBP1   | CST                 | 9459                | Rabbit  | 1:2000        |
| 7  | 53BP1                                | 53BP1                       | TP53BP1    | CST                 | 4937                | Rabbit  | 1:300         |
| 8  | A1Up                                 | UBQLN4                      | UBQLN4     | Santa Cruz          | sc-136145           | Mouse   | 1:125         |
| 9  | Acetyl-CoA-Carboxylase               | ACC1                        | ACACA, B   | Epitomics/<br>Abcam | 1768-1/<br>ab45174  | Rabbit  | 1:1500        |
| 10 | Acetyl-CoA-Carboxylase (phospho S79) | ACC_pS79                    | ACACA, B   | CST                 | 3661                | Rabbit  | 1:500         |
| 11 | ACSL1 (D2H5)                         | ACSL1                       | ACSL1      | CST                 | 9189                | Rabbit  | 1:500         |
| 12 | ACVRL1                               | ACVRL1                      | ACVRL1     | Epitomics/<br>Abcam | 2940-1/<br>ab108207 | Rabbit  | 1:30          |
| 13 | ADAR1                                | ADAR1                       | ADAR       | Abcam               | ab88574             | Mouse   | 1:100         |
| 14 | Akt                                  | Akt                         | AKT1, 2, 3 | CST                 | 4691                | Rabbit  | 1:7500        |
| 15 | Akt (phospho S473)                   | Akt_pS473                   | AKT1, 2, 3 | CST                 | 9271                | Rabbit  | 1:150         |
| 16 | Akt (phospho T308)                   | Akt_pT308                   | AKT1, 2, 3 | CST                 | 2965                | Rabbit  | 1:250         |
| 17 | Akt1                                 | Akt1                        | AKT1       | CST                 | 2938                | Rabbit  | 1:1000        |
| 18 | Akt1 (phospho S473)                  | Akt1_pS473                  | AKT1       | CST                 | 9018                | Rabbit  | 1:1000        |
| 19 | Akt2                                 | Akt2                        | AKT2       | CST                 | 3063                | Rabbit  | 1:3000        |
| 20 | Akt2 (phospho S474)                  | Akt2_pS474                  | AKT2       | CST                 | 8599                | Rabbit  | 1:1000        |
| 21 | Ambra1 (phospho S52)                 | Ambra1_pS52                 | AMBRA1     | Millipore           | ABC80               | Rabbit  | 1:250         |
| 22 | AMPK alpha 2 (phospho S345)          | AMPK-a2_pS345               | PRKAA1, 2  | Abcam               | ab129081            | Rabbit  | 1:200         |
| 23 | AMPKa                                | AMPKa                       | PRKAA1, 2  | CST                 | 2532                | Rabbit  | 1:75          |

|    |                              |             |           |                     |                    |        |        |
|----|------------------------------|-------------|-----------|---------------------|--------------------|--------|--------|
| 24 | AMPKa<br>(phospho T172)      | AMPKa_pT172 | PRKAA1, 2 | CST                 | 2535               | Rabbit | 1:100  |
| 25 | Androgen<br>Receptor (D6F11) | AR          | AR        | CST                 | 5153               | Rabbit | 1:250  |
| 26 | Annexin I                    | Annexin-I   | ANXA1     | BD<br>Biosciences   | 610066             | Mouse  | 1:5000 |
| 27 | Annexin VII                  | Annexin-VII | ANXA7     | BD<br>Biosciences   | 610668             | Mouse  | 1:20   |
| 28 | A-Raf                        | A-Raf       | ARAF      | CST                 | 4432               | Rabbit | 1:200  |
| 29 | A-Raf<br>(phospho S299)      | A-Raf_pS299 | ARAF      | CST                 | 4431               | Rabbit | 1:25   |
| 30 | ARID1A                       | ARID1A      | ARID1A    | Sigma-Aldrich       | HPA005456          | Rabbit | 1:1000 |
| 31 | ASNS                         | ASNS        | ASNS      | Sigma-Aldrich       | HPA029318          | Rabbit | 1:500  |
| 32 | Atg3                         | Atg3        | ATG3      | CST                 | 3415               | Rabbit | 1:72   |
| 33 | Atg4B                        | Atg4B       | ATG4B     | CST                 | 13507              | Rabbit | 1:200  |
| 34 | Atg5                         | Atg5        | ATG5      | CST                 | 12994              | Rabbit | 1:1000 |
| 35 | Atg7                         | Atg7        | ATG7      | CST                 | 8558               | Rabbit | 1:1000 |
| 36 | ATM                          | ATM         | ATM       | CST                 | 2873               | Rabbit | 1:250  |
| 37 | ATM<br>(phospho S1981)       | ATM_pS1981  | ATM       | CST                 | 5883               | Rabbit | 1:20   |
| 38 | ATP5A                        | ATP5A       | ATP5A     | Abcam               | ab14748            | Mouse  | 1:500  |
| 39 | ATP5H                        | ATP5H       | ATP5H     | Abcam               | ab110275           | Mouse  | 1:30   |
| 40 | ATR                          | ATR         | ATR       | CST                 | 2790               | Rabbit | 1:30   |
| 41 | ATR<br>(phospho S428)        | ATR_pS428   | ATR       | Abcam               | ab178407           | Rabbit | 1:1000 |
| 42 | ATRX                         | ATRX        | ATRX      | Abcam               | ab97508            | Rabbit | 1:300  |
| 43 | Aurora B/AIM1                | Aurora-B    | AURKB     | CST                 | 3094               | Rabbit | 1:38   |
| 44 | Axl                          | Axl         | AXL       | CST                 | 8661               | Rabbit | 1:500  |
| 45 | B7-H3                        | B7-H3       | CD276     | CST                 | 14058              | Rabbit | 1:200  |
| 46 | B7-H4                        | B7-H4       | VTCN1     | CST                 | 14572              | Rabbit | 1:50   |
| 47 | Bad<br>(phospho S112)        | Bad_pS112   | BAD       | CST                 | 9291               | Rabbit | 1:50   |
| 48 | Bak                          | Bak         | BAK1      | Epitomics/<br>Abcam | 1542-1/<br>ab32371 | Rabbit | 1:400  |
| 49 | BAP1                         | BAP1        | BAP1      | Santa Cruz          | sc-28383           | Mouse  | 1:200  |
| 50 | Bax                          | Bax         | BAX       | CST                 | 2772               | Rabbit | 1:100  |
| 51 | b-Catenin                    | b-Catenin   | CTNNB1    | CST                 | 9562               | Rabbit | 1:1500 |
| 52 | Bcl2                         | Bcl2        | BCL2      | Dako                | M0887              | Mouse  | 1:50   |
| 53 | Bcl2A1                       | Bcl2A1      | BCL2A1    | Abnova              | PAB8528            | Rabbit | 1:250  |
| 54 | Bcl-xL                       | Bcl-xL      | BCL2L1    | CST                 | 2762               | Rabbit | 1:100  |

|    |                                |                          |         |                     |                    |        |        |
|----|--------------------------------|--------------------------|---------|---------------------|--------------------|--------|--------|
| 55 | Beclin 1                       | Beclin                   | BECN1   | ThermoFisher        | PA1-16857          | Rabbit | 1:500  |
| 56 | beta Actin                     | b-Actin                  | ACTB    | CST                 | 4970               | Rabbit | 1:50   |
| 57 | beta Catenin (phospho T41/S45) | b-Catenin_pT41_S45       | CTNNB1  | CST                 | 9565               | Rabbit | 1:30   |
| 58 | Bid                            | Bid                      | BID     | CST                 | 2002               | Rabbit | 1:500  |
| 59 | Bim (C34C5)                    | Bim                      | BCL2L11 | Epitomics/<br>Abcam | 1036-1/<br>ab32158 | Rabbit | 1:400  |
| 60 | BiP/GRP78                      | BiP-GRP78                | HSPA5   | BD<br>Biosciences   | 610978             | Mouse  | 1:150  |
| 61 | BMK1/Erk5 (phospho T218/Y220)  | BMK1-<br>Erk5_pT218_Y220 | MAPK7   | Millipore           | 07-507             | Rabbit | 1:500  |
| 62 | B-Raf                          | B-Raf                    | BRAF    | CST                 | 14814              | Rabbit | 1:500  |
| 63 | B-Raf (phospho S445)           | B-Raf_pS445              | BRAF    | CST                 | 2696               | Rabbit | 1:75   |
| 64 | BRD4                           | BRD4                     | BRD4    | CST                 | 13440              | Rabbit | 1:1000 |
| 65 | CA9 (CAIX)                     | CA9                      | CA9     | CST                 | 5649               | Rabbit | 1:200  |
| 66 | c-Abl                          | c-Abl                    | ABL1    | CST                 | 2862               | Rabbit | 1:100  |
| 67 | c-Abl (phospho Y412)           | Abl_pY412                | ABL1    | CST                 | 2865               | Rabbit | 1:200  |
| 68 | Caspase 3 (cleaved asp175)     | Caspase-3-cleaved        | CASP3   | CST                 | 9661               | Rabbit | 1:500  |
| 69 | Caspase 7 (cleaved)            | Caspase-7-cleaved        | CASP7   | CST                 | 9491               | Rabbit | 1:60   |
| 70 | Caspase 8                      | Caspase-8                | CASP8   | CST                 | 9746               | Mouse  | 1:150  |
| 71 | Caspase 8 (cleaved asp391)     | Caspase-8-cleaved        | CASP8   | CST                 | 9496               | Rabbit | 1:500  |
| 72 | Caspase-3                      | Caspase-3                | CASP3   | Epitomics/<br>Abcam | 1476-1/<br>ab32042 | Rabbit | 1:250  |
| 73 | Caveolin 1                     | Caveolin-1               | CAV1    | CST                 | 3238               | Rabbit | 1:3000 |
| 74 | CD134/OX40                     | CD134                    | TNFRSF  | Abcam               | ab76000            | Rabbit | 1:100  |
| 75 | CD171 (L1)                     | CD171                    | L1CAM   | Biologend           | 826701             | Mouse  | 1:1000 |
| 76 | CD20                           | CD20                     | MS4A1   | Epitomics/<br>Abcam | 1632-1/<br>ab78237 | Rabbit | 1:75   |
| 77 | CD26                           | CD26                     | DPP4    | Abcam               | ab28340            | Rabbit | 1:1000 |
| 78 | CD29                           | CD29                     | ITGB1   | BD<br>Biosciences   | 610467             | Mouse  | 1:30   |
| 79 | CD31                           | CD31                     | PECAM1  | Dako/<br>Fisher     | M0823/<br>MS353S   | Mouse  | 1:25   |
| 80 | CD38                           | CD38                     | CD38    | Abcam               | ab108403           | Rabbit | 1:250  |
| 81 | CD4                            | CD4                      | CD4     | Abcam               | ab133616           | Rabbit | 1:500  |

|     |                           |                        |            |                       |                      |        |        |
|-----|---------------------------|------------------------|------------|-----------------------|----------------------|--------|--------|
| 82  | CD44                      | CD44                   | CD44       | CST                   | 3570                 | Mouse  | 1:20   |
| 83  | CD45                      | CD45                   | CD45       | DAKO/<br>ThermoFisher | M070129-2/<br>MS355P | Mouse  | 1:1000 |
| 84  | CD49b                     | CD49b                  | ITGA2      | BD<br>Biosciences     | 611016               | Mouse  | 1:50   |
| 85  | CD86                      | CD86                   | CD86       | Abcam                 | ab53004              | Rabbit |        |
| 86  | Cdc2 (phospho<br>Y15)     | cdc2_pY15              | CDK        | CST                   | 4539                 | Rabbit | 1:38   |
| 87  | cdc25C                    | cdc25C                 | CDC25C     | CST                   | 4688                 | Rabbit | 1:250  |
| 88  | CDK1/2/3<br>(phospho T14) | CDK1_pT14              | CDK1, 2, 3 | Abcam                 | ab32384              | Rabbit | 1:1000 |
| 89  | CDKN2A/p16INK4<br>a       | p16INK4a               | CDKN2A     | Abcam                 | ab81278              | Rabbit | 1:500  |
| 90  | Chk1                      | Chk1                   | CHEK       | CST                   | 2360                 | Mouse  | 1:100  |
| 91  | Chk1 (phospho<br>S296)    | Chk1_pS296             | CHEK1      | Abcam                 | ab79758              | Rabbit | 1:125  |
| 92  | Chk1 (phospho<br>S345)    | Chk1_pS345             | CHEK1      | CST                   | 2348                 | Rabbit | 1:30   |
| 93  | Chk2                      | Chk2                   | CHEK2      | CST                   | 3440                 | Mouse  | 1:50   |
| 94  | Chk2 (phospho<br>T68)     | Chk2_pT68              | CHEK2      | CST                   | 2197                 | Rabbit | 1:250  |
| 95  | c-IAP2                    | c-IAP2                 | BIRC3      | CST                   | 3130                 | Rabbit | 1:50   |
| 96  | CIITA                     | CIITA                  | CIITA      | CST                   | 3793                 | Rabbit | 1:250  |
| 97  | c-Jun (phospho<br>S73)    | c-Jun_pS73             | JUN        | CST                   | 9164                 | Rabbit | 1:30   |
| 98  | c-Kit                     | c-Kit                  | KIT        | Epitomics/<br>Abcam   | 1522-1/<br>ab32363   | Rabbit | 1:250  |
| 99  | Claudin 7                 | Claudin-7              | CLDN7      | Abcam                 | ab79481              | Rabbit | 1:250  |
| 100 | c-Myc                     | c-Myc                  | MYC        | Santa Cruz            | sc-764               | Rabbit | 1:250  |
| 101 | COG3                      | COG3                   | COG3       | ProteinTech           | 11130-1-AP           | Rabbit | 1:750  |
| 102 | Collagen-<br>VI/COL6A1    | Collagen-VI            | COL6A1     | Santa Cruz            | sc-20649             | Rabbit | 1:6000 |
| 103 | Complex II<br>Subunit     | Complex-II-<br>Subunit | SDHB       | Life<br>Technologies  | 459230               | Mouse  | 1:200  |
| 104 | Connexin 43               | Connexin-43            | GJA1       | CST                   | 3512                 | Rabbit | 1:150  |
| 105 | Coup-TFII                 | Coup-TFII              | NR2F2      | CST                   | 6434                 | Rabbit | 1:50   |
| 106 | Cox2                      | Cox2                   | PTGS2      | CST                   | 4842                 | Rabbit | 1:75   |
| 107 | Cox-IV                    | Cox-IV                 | COX4I1     | CST                   | 4850                 | Rabbit | 1:5000 |
| 108 | C-Raf                     | C-Raf                  | RAF1       | Millipore             | 04-739               | Rabbit | 1:100  |
| 109 | C-Raf (phospho<br>S338)   | C-Raf_pS338            | RAF1       | CST                   | 9427                 | Rabbit | 1:200  |

|     |                                          |                  |                   |                     |                    |        |         |
|-----|------------------------------------------|------------------|-------------------|---------------------|--------------------|--------|---------|
| 110 | Creb                                     | Creb             | CREB1             | CST                 | 9197               | Rabbit | 1:75    |
| 111 | CSK                                      | CSK              | CSK               | CST                 | 4980               | Rabbit | 1:300   |
| 112 | CtIP                                     | CtIP             | RBBP8             | CST                 | 9201               | Rabbit | 1:500   |
| 113 | Cyclin B1                                | Cyclin B1        | CCNB1             | Epitomics/<br>Abcam | 1495-1/<br>ab32053 | Rabbit | 1:1500  |
| 114 | Cyclin D1                                | Cyclin-D1        | CCND1             | Millipore<br>Sigma  | SAB4502603         | Rabbit | 1:200   |
| 115 | Cyclin D3                                | Cyclin D3        | CCND3             | CST                 | 2936               | Mouse  | 1:1000  |
| 116 | Cyclin E1                                | Cyclin E1        | CCNE1             | Santa Cruz          | sc-247             | Mouse  | 1:25    |
| 117 | Cyclophilin-F                            | Cyclophilin-F    | PPIF              | Abcam               | MSA04/<br>ab110324 | Mouse  | 1:50000 |
| 118 | Cytokeratin 19                           | Cytokeratin-19   | KRT19             | Dako                | M0888              | Mouse  | 1:50    |
| 119 | DAP Kinase 1<br>(phospho S308)           | DAPK1_pS308      | DAPK1             | GeneTex             | GTX10524           | Mouse  | 1:200   |
| 120 | DAP Kinase 2                             | DAPK2            | DAPK2             | Abcam               | ab51601            | Rabbit | 1:250   |
| 121 | DDB-1                                    | DDB-1            | DDB1              | CST                 | 6998               | Rabbit | 1:5000  |
| 122 | Detyrosinated<br>alpha-Tubulin           | D-a-Tubulin      | TUBA4A,<br>TUBA3C | Abcam               | ab48389            | Rabbit | 1:1500  |
| 123 | Di-Methyl-<br>Histone H3<br>(Lys4/C64G9) | DM-Histone-H3    | HIST1H3A          | CST                 | 9725               | Rabbit | 1:100   |
| 124 | Dimethyl-K9<br>Histone H3                | DM-K9-Histone-H3 | HIST3H3           | Abcam               | ab1220             | Mouse  | 1:250   |
| 125 | DNA Ligase IV                            | DNA-Ligase-IV    | LIG4              | CST                 | 14649              | Rabbit | 1:1000  |
| 126 | DNA Polymerase<br>gamma (D1Y6R)          | POLG             | POLG              | CST                 | 13609              | Rabbit | 1:500   |
| 127 | DNMT1 (D63A6)                            | DNMT1            | DNMT1             | CST                 | 5032               | Rabbit | 1:500   |
| 128 | DRP1 (D8H5)                              | DRP1             | DNM1L             | CST                 | 5391               | Rabbit | 1:1000  |
| 129 | DUSP4/MKP2                               | DUSP4            | DUSP4             | CST                 | 5149               | Rabbit | 1:150   |
| 130 | DUSP6                                    | DUSP6            | DUSP6             | Abcam               | ab76310            | Rabbit | 1:750   |
| 131 | Dvl3                                     | Dvl3             | DVL3              | CST                 | 3218               | Rabbit | 1:30    |
| 132 | E2F1                                     | E2F1             | E2F1              | Santa Cruz          | sc-251             | Mouse  | 1:20    |
| 133 | E-Cadherin                               | E-Cadherin       | CDH1              | CST                 | 3195               | Rabbit | 1:150   |
| 134 | eEF2                                     | eEF2             | EEF2              | CST                 | 2332               | Rabbit | 1:50    |
| 135 | eEF2K                                    | eEF2K            | EEF2K             | CST                 | 3692               | Rabbit | 1:50    |
| 136 | EGFR                                     | EGFR             | EGFR              | CST                 | 2232               | Rabbit | 1:75    |
| 137 | EGFR (phospho<br>Y1173)                  | EGFR_pY1173      | EGFR              | Epitomics/<br>Abcam | 1124-1/<br>ab32578 | Rabbit | 1:300   |
| 138 | eIF4E                                    | eIF4E            | EIF4E             | CST                 | 9742               | Rabbit | 1:75    |
| 139 | eIF4E (phospho<br>S209)                  | eIF4E_pS209      | EIF4E             | Abcam               | ab76256            | Rabbit | 1:250   |

|     |                                        |                   |        |                  |                     |        |         |
|-----|----------------------------------------|-------------------|--------|------------------|---------------------|--------|---------|
| 140 | eIF4G                                  | eIF4G             | EIF4G1 | CST              | 2498                | Rabbit | 1:1000  |
| 141 | Elk1 (phospho S383)                    | Elk1_pS383        | ELK1   | CST              | 9181                | Rabbit | 1:50    |
| 142 | Enolase-2 (D20H2)                      | Enolase-2         | ENO2   | CST              | 8171                | Rabbit | 1:250   |
| 143 | ENY2                                   | ENY2              | ENY2   | GeneTex          | GTX629542           | Mouse  | 1:500   |
| 144 | Eph Receptor A2                        | EPHA2             | EPHA2  | Abcam            | ab133501            | Rabbit | 1:1000  |
| 145 | Epithelial Membrane Antigen            | EMA               | MUC1   | DAKO             | M061329-2           | Mouse  | 1:750   |
| 146 | ErbB3/HER3                             | HER3              | ERBB3  | Santa Cruz       | sc-285              | Rabbit | 1:300   |
| 147 | ErbB3/HER3 (phospho Y1289)             | HER3_pY1289       | ERBB3  | CST              | 4791                | Rabbit | 1:50    |
| 148 | ERCC1                                  | ERCC1             | ERCC1  | Santa Cruz       | sc-17809            | Mouse  | 1:38    |
| 149 | Erk5                                   | Erk5              | MAPK7  | CST              | 3552                | Rabbit | 1:500   |
| 150 | ERRalpha (E1G1J)                       | ERRalpha          | ESRRA  | CST              | 13826               | Rabbit | 1:500   |
| 151 | ERRFI1/MIG6                            | MIG6              | ERRFI1 | Sigma-Aldrich    | WH0054206 M1        | Mouse  | 1:50    |
| 152 | Estrogen Receptor                      | ER                | ESR1   | Lab Vision       | RM-9101             | Rabbit | 1:40    |
| 153 | Estrogen Receptor alpha                | ER-a              | ERSA   | CST              | 13258               | Rabbit | 1:500   |
| 154 | Estrogen Receptor alpha (phospho S118) | ER-a_pS118        | ESR1   | Epitomics/ Abcam | 1091-1/ ab32396     | Rabbit | 1:500   |
| 155 | Ets-1                                  | Ets-1             | ETS1   | Bethyl           | A303-501A           | Rabbit | 1:100   |
| 156 | FAK                                    | FAK               | PTK2   | Epitomics/ Abcam | 1700-1/ ab40794     | Rabbit | 1:1000  |
| 157 | FAK (phospho Y397)                     | FAK_pY397         | PTK2   | CST              | 3283                | Rabbit | 1:25    |
| 158 | Fatty Acid Synthase                    | FASN              | FASN   | CST              | 3180                | Rabbit | 1:1000  |
| 159 | FGF-basic                              | FGF-basic         | FGF2   | VWR              | 10775-082 (500-P18) | Rabbit | 1:1000  |
| 160 | Fibronectin                            | Fibronectin       | FN1    | Epitomics        | 1574-1              | Rabbit | 1:10000 |
| 161 | FoxM1                                  | FOXO1             | FOXO1  | CST              | 5436                | Rabbit | 1:30    |
| 162 | FoxO3a                                 | FoxO3a            | FOXO3  | CST              | 2497                | Rabbit | 1:20    |
| 163 | FoxO3a (phospho S318/S321)             | FoxO3a_pS318_S321 | FOXO3  | CST              | 9465                | Rabbit | 1:30    |
| 164 | FRS2-a (phospho Y196)                  | FRS2-a_pY196      | FRS2   | CST              | 3864                | Rabbit | 1:100   |
| 165 | G6PD                                   | G6PD              | G6PD   | Santa Cruz       | sc-373887           | Mouse  | 1:75    |

|     |                                         |                  |          |                             |            |        |         |
|-----|-----------------------------------------|------------------|----------|-----------------------------|------------|--------|---------|
| 166 | Gab2                                    | Gab2             | GAB2     | CST                         | 3239       | Rabbit | 1:300   |
| 167 | GAPDH                                   | GAPDH            | GAPDH    | Ambion/<br>Invitrogen       | AM4300     | Mouse  | 1:75000 |
| 168 | GATA3                                   | GATA3            | GATA3    | BD<br>Biosciences           | 558686     | Mouse  | 1:150   |
| 169 | GATA6                                   | GATA6            | GATA6    | CST                         | 5851       | Rabbit | 1:200   |
| 170 | GCLC                                    | GCLC             | GCLC     | Proteintech<br>Group        | 12601-1-AP | Rabbit | 1:500   |
| 171 | GCLM                                    | GCLM             | GCLM     | Abcam                       | ab124827   | Rabbit | 1:500   |
| 172 | GCN5L2                                  | GCN5L2           | KAT2A    | CST                         | 3305       | Rabbit | 1:30    |
| 173 | Gli1                                    | Gli1             | GLI1     | CST                         | 3538       | Rabbit | 1:3000  |
| 174 | Gli3                                    | Gli3             | GLI3     | Abcam                       | ab69838    | Rabbit | 1:1000  |
| 175 | Glucose-6<br>Phosphate<br>Dehydrogenase | G6PD             | G6PD     | CST                         | 8866       | Rabbit | 1:30    |
| 176 | Glutamate<br>Dehydrogenase1/<br>2       | Glutamate-D1-2   | GLUD1    | Novus                       | NBP2-16679 | Rabbit | 1:500   |
| 177 | Glutaminase                             | Glutaminase      | GLS      | Abcam                       | ab156876   | Rabbit | 1:150   |
| 178 | Glycogen<br>Synthase                    | Gys              | GYS1     | CST                         | 3886       | Rabbit | 1:2000  |
| 179 | Glycogen<br>Synthase<br>(phospho S641)  | Gys_pS641        | GYS1     | CST                         | 3891       | Rabbit | 1:300   |
| 180 | GPBB                                    | GPBB             | PYGM     | Novus                       | NBP1-32799 | Rabbit | 1:200   |
| 181 | Granzyme B                              | Granzyme-B       | GZMB     | CST                         | 4275       | Rabbit | 1:500   |
| 182 | GRB7                                    | GRB7             | GRB7     | Abcam                       | ab183737   | Rabbit | 1:500   |
| 183 | Grp75 (D13H4)                           | Grp75            | HSPA9    | CST                         | 3593       | Rabbit | 1:250   |
| 184 | GSK-3alpha/beta                         | GSK-3a-b         | GSK3A, B | Santa Cruz                  | sc-7291    | Mouse  | 1:750   |
| 185 | GSK-3alpha/beta<br>(phospho S21/S9)     | GSK-3a-b_pS21_S9 | GSK3A, B | CST                         | 9331       | Rabbit | 1:200   |
| 186 | GSK-3B                                  | GSK-3B           | GSK3B    | CST                         | 9315       | Rabbit | 1:750   |
| 187 | GSK-3beta<br>(phospho S9)               | GSK-3b_pS9       | GSK3B    | CST                         | 5558       | Rabbit | 1:250   |
| 188 | H2AX (phospho<br>S140)                  | H2AX_pS140       | H2AFX    | Pierce<br>Biotechnolog<br>y | MA12022    | Mouse  | 1:100   |
| 189 | Hamartin/TSC1                           | TSC1             | TSC1     | CST                         | 4906       | Rabbit | 1:200   |
| 190 | HER2                                    | HER2             | ERBB2    | Lab Vision                  | MS-325-P1  | Mouse  | 1:300   |
| 191 | HER2 (phospho<br>Y1248)                 | HER2_pY1248      | ERBB2    | R&D systems                 | AF1768     | Rabbit | 1:1500  |
| 192 | Heregulin                               | Heregulin        | NRG1     | CST                         | 2573       | Rabbit | 01:30   |

|     |                             |                    |             |                |            |        |        |
|-----|-----------------------------|--------------------|-------------|----------------|------------|--------|--------|
| 193 | HES1                        | HES1               | HES1        | CST            | 11988      | Rabbit | 1:500  |
| 194 | Hexokinase II               | Hexokinase II      | HK2         | CST            | 2106       | Rabbit | 1:100  |
| 195 | Hif-1-alpha                 | Hif-1-alpha        | HIF1A       | BD Biosciences | 610958     | Mouse  | 1:20   |
| 196 | Histone H3                  | Histone H3         | HIST3H3     | Abcam          | ab1791     | Rabbit | 1:5000 |
| 197 | HLA-DQA1                    | HLA-DQA1           | HLA-DQA1    | Abcam          | ab128959   | Rabbit | 1:3000 |
| 198 | HLA-DR/DP/DQ/DX             | HLA-DR-DP-DQ-DX    | HLA-DRA     | Santa Cruz     | sc-53302   | Mouse  | 1:250  |
| 199 | HMHA1                       | HMHA1              | HMHA1       | ProteinTech    | 14832-1-AP | Rabbit | 1:3000 |
| 200 | HSP27                       | HSP27              | HSBP1       | CST            | 2402       | Mouse  | 1:75   |
| 201 | HSP27 (phospho S82)         | HSP27_pS82         | HSBP1       | CST            | 2401       | Rabbit | 1:75   |
| 202 | HSP60                       | HSP60              | HSP60       | CST            | 12165      | Rabbit | 1:1000 |
| 203 | HSP70                       | HSP70              | HSPA1A      | CST            | 4872       | Rabbit | 1:50   |
| 204 | Hsp75/TRAP1                 | TRAP1              | TRAP1       | BD Biosciences | 612344     | Mouse  | 1:750  |
| 205 | IDO                         | IDO                | IDO1        | CST            | 86630      | Rabbit | 1:200  |
| 206 | IGF1R (phospho Y1135/Y1136) | IGF1R_pY1135_Y1136 | IGF1R, INSR | CST            | 3024       | Rabbit | 1:30   |
| 207 | IGF-1Receptor beta          | IGF1R-b            | IGF1R       | CST            | 3018       | Rabbit | 1:50   |
| 208 | IGFBP2                      | IGFBP2             | IGFBP2      | CST            | 3922       | Rabbit | 1:50   |
| 209 | IGFBP3                      | IGFBP3             | IGFBP3      | BD Biosciences | 611504     | Mouse  | 1:1000 |
| 210 | IGFRb                       | IGFRb              | IGF1R       | CST            | 3027       | Rabbit | 1:250  |
| 211 | IL-6                        | IL-6               | IL6         | CST            | 12153      | Rabbit | 1:250  |
| 212 | INPP4b                      | INPP4b             | INPP4B      | CST            | 4039       | Rabbit | 01:30  |
| 213 | Insulin Receptor beta       | IR-b               | INSR        | CST            | 3025       | Rabbit | 1:100  |
| 214 | IRF-1                       | IRF-1              | IRF1        | CST            | 8478       | Rabbit | 1:250  |
| 215 | IRS1                        | IRS1               | IRS1        | Millipore      | 06-248     | Rabbit | 1:250  |
| 216 | IRS2                        | IRS2               | IRS2        | CST            | 4502       | Rabbit | 1:100  |
| 217 | JAB1                        | JAB1               | COPS5       | Santa Cruz     | sc-13157   | Mouse  | 1:30   |
| 218 | Jagged1                     | Jagged1            | JAG1        | Abcam          | ab109536   | Rabbit | 01:50  |
| 219 | Jak2                        | Jak2               | JAK2        | CST            | 3230       | Rabbit | 1:750  |
| 220 | JNK (phospho T183/Y185)     | JNK_pT183_Y185     | MAPK8       | CST            | 4668       | Rabbit | 01:30  |
| 221 | JNK2                        | JNK2               | MAPK9       | CST            | 4672       | Rabbit | 1:25   |
| 222 | KAP1                        | KAP1               | TRIM28      | Abcam          | ab10484    | Rabbit | 1:2000 |
| 223 | KMT3A/HYPB/HIF-1            | SETD2              | SETD2       | abcam          | ab184190   | Rabbit | 1:1000 |



|            |                                         |                      |                |                     |                    |        |        |
|------------|-----------------------------------------|----------------------|----------------|---------------------|--------------------|--------|--------|
| <b>224</b> | LAD1                                    | LAD1                 | LAD1           | Atlas               | HPA028732          | Rabbit | 1:500  |
| <b>225</b> | Lasu1/Ureb1                             | Lasu1                | HUWE1          | Bethyl              | IHC-00439          | Rabbit | 1:1000 |
| <b>226</b> | LC3A/B                                  | LC3A-B               | MAP1LC3A,<br>B | CST                 | 4108               | Rabbit | 1:250  |
| <b>227</b> | Lck                                     | Lck                  | LCK            | CST                 | 2752               | Rabbit | 1:75   |
| <b>228</b> | LDHA                                    | LDHA                 | LDHA           | CST                 | 3582               | Rabbit | 1:250  |
| <b>229</b> | LRP6 (phospho<br>S1490)                 | LRP6_pS1490          | LRP6           | CST                 | 2568               | Rabbit | 1:250  |
| <b>230</b> | MAPK (phospho<br>T202/Y204)             | MAPK_pT202/Y20<br>4  | MAPK1, 3       | CST                 | 4377               | Rabbit | 1:25   |
| <b>231</b> | Mcl-1                                   | Mcl-1                | MCL1           | CST                 | 5453               | Rabbit | 1:100  |
| <b>232</b> | MDM2 (phospho<br>S166)                  | MDM2_pS166           | MDM2           | CST                 | 3521               | Rabbit | 1:60   |
| <b>233</b> | MEK1                                    | MEK1                 | MAP2K1         | Epitomics/<br>Abcam | 1235-1/<br>ab32576 | Rabbit | 1:1500 |
| <b>234</b> | MEK1 (phospho<br>S217/S221)             | MEK1_p_S217/<br>S221 | MAP2K1, 2      | CST                 | 9154               | Rabbit | 1:50   |
| <b>235</b> | MEK2                                    | MEK2                 | MAP2K2         | CST                 | 9125               | Rabbit | 1:50   |
| <b>236</b> | MelanA                                  | MelanA               | MLANA          | Abcam               | ab51061            | Rabbit | 1:500  |
| <b>237</b> | Melanoma gp100                          | Melan-gp100          | PMEL           | Abcam               | ab137078           | Rabbit | 1:500  |
| <b>238</b> | MERIT40                                 | MERIT40              | MERIT40        | CST                 | 12711              | Rabbit | 1:3000 |
| <b>239</b> | MERIT40<br>(phospho S29)                | MERIT40_pS29         | BABAM1         | CST                 | 12110              | Rabbit | 1:300  |
| <b>240</b> | Merlin/NF2                              | Merlin               | NF2            | Novus               | 22710002           | Rabbit | 1:250  |
| <b>241</b> | MIF                                     | MIF                  | MIF            | Santa Cruz          | sc-130329          | Rabbit | 1:100  |
| <b>242</b> | MITF (D5G7V)                            | MITF                 | MITF           | CST                 | 12590              | Rabbit | 1:500  |
| <b>243</b> | Mitofusin-1                             | Mitofusin-1          | MFN1           | CST                 | 14739              | Rabbit | 1:500  |
| <b>244</b> | Mitofusin-2                             | Mitofusin-2          | MFN2           | CST                 | 11925              | Rabbit | 1:1000 |
| <b>245</b> | MLH1 (4C9C7)                            | MLH1                 | MLH1           | CST                 | 3515               | Mouse  | 1:500  |
| <b>246</b> | MLKL                                    | MLKL                 | MLKL           | CST                 | 14993              | Rabbit | 1:1000 |
| <b>247</b> | MMP2                                    | MMP2                 | MMP2           | CST                 | 4022               | Rabbit | 1:75   |
| <b>248</b> | Mnk1                                    | Mnk1                 | MKNK1          | CST                 | 2195               | Rabbit | 1:750  |
| <b>249</b> | Monocarboxylic<br>Acid Transporter<br>4 | MCT4                 | SLC16A4        | Millipore           | AB3314P            | Rabbit | 1:500  |
| <b>250</b> | MR1                                     | MR1                  | MR1            | Santa Cruz          | sc-377312          | Mouse  | 1:500  |
| <b>251</b> | MRAP                                    | MRAP                 | MRAP           | Abcam               | ab103319           | Rabbit | 1:500  |
| <b>252</b> | MSH2 (D24B5)                            | MSH2                 | MSH2           | CST                 | 2017               | Rabbit | 1:750  |
| <b>253</b> | MSH6                                    | MSH6                 | MSH6           | Novus               | 22030002           | Rabbit | 1:1000 |
| <b>254</b> | MSI2 (EP1305Y)                          | MSI2                 | MSI2           | Abcam               | ab76148            | Rabbit | 1:1000 |

|     |                            |                   |                       |                     |                     |        |         |
|-----|----------------------------|-------------------|-----------------------|---------------------|---------------------|--------|---------|
| 255 | MTCO1                      | MTCO1             | MTCO1                 | Abcam               | ab14705             | Mouse  | 1:500   |
| 256 | mTOR                       | mTOR              | MTOR                  | CST                 | 2983                | Rabbit | 1:3000  |
| 257 | mTOR (phospho S2448)       | mTOR_pS2448       | MTOR                  | CST                 | 2971                | Rabbit | 1:50    |
| 258 | MTSS1                      | MTSS1             | MTSS1                 | Novus               | H00009788-M01A      | Mouse  | 1:250   |
| 259 | Myosin Heavy Chain 11      | Myosin-11         | MYH11                 | Novus               | 21370002            | Rabbit | 1:1000  |
| 260 | Myosin IIa                 | Myosin-IIa        | MYH9                  | CST                 | 3403                | Rabbit | 1:1000  |
| 261 | Myosin IIa (phospho S1943) | Myosin-IIa_pS1943 | MYH9                  | CST                 | 5026                | Rabbit | 1:750   |
| 262 | Myt1                       | Myt1              | PKMYT1                | CST                 | 4282                | Rabbit | 1:100   |
| 263 | NAPSIN-A                   | NAPSIN-A          | NAPSA                 | Epitomics/<br>Abcam | 5795-1/<br>ab129189 | Rabbit | 1:150   |
| 264 | N-Cadherin                 | N-Cadherin        | CDH2                  | CST                 | 4061                | Rabbit | 1:25    |
| 265 | NDRG1 (phospho T346)       | NDRG1_pT346       | NDRG1                 | CST                 | 3217                | Rabbit | 01:50   |
| 266 | NDUFB4                     | NDUFB4            | NDUFB4                | Abcam               | ab110243            | Mouse  | 1:25    |
| 267 | NF-kB p65 (phospho S536)   | NF-kB-p65_pS536   | RELA                  | CST                 | 3033                | Rabbit | 1:30    |
| 268 | Notch1                     | Notch1            | NOTCH1                | CST                 | 3268                | Rabbit | 01:30   |
| 299 | Notch1 (Cleaved)           | Notch1-cleaved    | NOTCH1                | CST                 | 4147                | Rabbit | 1:100   |
| 270 | Notch3                     | Notch3            | NOTCH3                | Novus               | H00004854-M01       | Mouse  | 1:250   |
| 271 | NQO1                       | NQO1              | NQO1                  | CST                 | 3187                | Mouse  | 1:15000 |
| 272 | N-Ras                      | N-Ras             | NRAS                  | Santa Cruz          | sc-31               | Mouse  | 1:50    |
| 273 | NRF2                       | NRF2              | NRF2                  | CST                 | 12721               | Rabbit | 1:500   |
| 274 | Oct-4                      | Oct-4             | POU5F1                | CST                 | 2750                | Rabbit | 1:40    |
| 275 | p16/INK4a                  | p16-INK4a         | CDKN2A                | Epitomics/<br>Abcam | 1712-1/<br>ab40803  | Rabbit | 1:500   |
| 276 | p21                        | p21               | CDKN1A                | Santa Cruz          | sc-6246             | Rabbit | 1:150   |
| 277 | p27 (phospho T157)         | p27_pT157         | CDKN1B                | R&D Systems         | AF1555              | Rabbit | 1:30    |
| 278 | p27 (phospho T198)         | p27_pT198         | CDKN1B                | Abcam               | ab64949             | Rabbit | 01:50   |
| 279 | p27 KIP 1                  | p27-Kip-1         | CDKN1B                | Epitomics/<br>Abcam | 1591-1/<br>ab32034  | Rabbit | 01:40   |
| 280 | p38 (phospho T180/Y182)    | p38_pT180_Y182    | MAPK11,<br>12, 13, 14 | CST                 | 9211                | Rabbit | 1:38    |
| 281 | p38 alpha MAPK             | p38-a             | MAPK1                 | CST                 | 9228                | Mouse  | 1:300   |
| 282 | p38 MAPK                   | p38-MAPK          | MAPK11,<br>12, 14     | CST                 | 9212                | Rabbit | 1:1500  |

|     |                              |                     |          |                   |                 |        |         |
|-----|------------------------------|---------------------|----------|-------------------|-----------------|--------|---------|
| 283 | p38/MAPK (phospho T180/Y182) | p38-MAPK_pT180_Y182 | MAPK14   | CST               | 9215            | Rabbit | 1:250   |
| 284 | p44/42 MAPK                  | p44-42-MAPK         | MAPK1, 3 | CST               | 4695            | Rabbit | 1:2000  |
| 285 | p53                          | p53                 | TP53     | CST               | 9282            | Rabbit | 1:2500  |
| 286 | p70 S6 Kinase (phospho T389) | p70-S6K_pT389       | RPS6KB1  | CST               | 9205            | Rabbit | 1:50    |
| 287 | p70/S6K1                     | p70-S6K1            | RPS6KB1  | Epitomics/ Abcam  | 1494-1/ ab32529 | Rabbit | 1:300   |
| 288 | p90RSK (phospho T573)        | p90RSK_pT573        | RPS6K    | CST               | 9346            | Rabbit | 1:25    |
| 289 | PAI-1                        | PAI-1               | SERPINE1 | BD Biosciences    | 612024          | Mouse  | 1:50    |
| 290 | PAICS                        | PAICS               | PAICS    | Sigma-Aldrich     | HPA035895       | Rabbit | 1:250   |
| 291 | PAK1                         | PAK1                | PAK1     | CST               | 2602            | Rabbit | 1:750   |
| 292 | PAK4                         | PAK4                | PAK4     | CST               | 3242            | Rabbit | 1:300   |
| 293 | PAR                          | PAR                 | PAR      | Trevigen          | 4336-BPC-100    | Rabbit | 1:30000 |
| 294 | PARG                         | PARG                | PARG     | CST               | 66564           | Rabbit | 1:1000  |
| 295 | PARK7/DJ1                    | DJ1                 | PARK7    | Abcam             | ab76008         | Rabbit | 1:5000  |
| 296 | PARP                         | PARP                | PARP1    | CST               | 9532            | Rabbit | 1:1000  |
| 297 | Patched                      | Patched             | PTCH1    | Abcam             | ab53715         | Rabbit | 1:1000  |
| 298 | Paxillin                     | Paxillin            | PXN      | CST               | 2542            | Rabbit | 1:250   |
| 299 | P-Cadherin                   | P-Cadherin          | CDH3     | CST               | 2130            | Rabbit | 1:38    |
| 300 | PCNA                         | PCNA                | PCNA     | CST               | 2586            | Mouse  | 1:250   |
| 301 | PD-1                         | PD-1                | PDCD1    | CST               | 43248           | Mouse  | 1:500   |
| 302 | Pdcd4                        | Pdcd4               | PDCD4    | Rockland          | 600-401-965     | Rabbit | 1:750   |
| 303 | PDGFRB                       | PDGFR-b             | PDGFRB   | Invitrogen        | MA5-15143       | Rabbit | 1:500   |
| 304 | PDH                          | PDH                 | PDH      | Abcam             | ab110332        | Mouse  | 1:100   |
| 305 | PDHK1                        | PDHK1               | PDHK1    | CST               | 3820            | Rabbit | 1:300   |
| 306 | PDK1                         | PDK1                | PDPK1    | CST               | 3062            | Rabbit | 01:50   |
| 307 | PDK1 (phospho S241)          | PDK1_pS241          | PDPK1    | CST               | 3061            | Rabbit | 01:50   |
| 308 | PD-L1                        | PD-L1               | CD274    | CST               | 13684           | Rabbit | 1:250   |
| 309 | PEA-15                       | PEA-15              | PEA15    | CST               | 2780S           | Rabbit | 1:100   |
| 310 | PED/PEA-15 (phospho S116)    | PEA-15_pS116        | PEA15    | Life Technologies | 44836G          | Rabbit | 1:100   |
| 311 | PHGDH                        | PHGDH               | PHGDH    | CST               | 13428           | Rabbit | 1:1000  |
| 312 | PI3 Kinase p110 alpha        | PI3K-p110-a         | PIK3CA   | CST               | 4255            | Rabbit | 1:50    |
| 313 | PI3K p110 beta               | PI3K-p110-b         | PIK3BC   | Santa Cruz        | sc-376412       | Mouse  | 1:40    |

|            |                                      |                       |                      |                   |               |        |         |
|------------|--------------------------------------|-----------------------|----------------------|-------------------|---------------|--------|---------|
| <b>314</b> | PI3K p85                             | PI3K-p85              | PIK3R1               | Millipore         | 06-195        | Rabbit | 1:15000 |
| <b>315</b> | PKA RI alpha                         | PKA-a                 | PRKAR1A              | CST               | 5675          | Rabbit | 1:250   |
| <b>316</b> | PKC alpha/beta II (phospho T638/641) | PKC-a-b-II_pT638_T641 | PRKCA, B             | CST               | 9375          | Rabbit | 1:1000  |
| <b>317</b> | PKC(pan) beta II (phospho S660)      | PKC-b-II_pS660        | PRKCA, B, D, E, H, Q | CST               | 9371          | Rabbit | 1:200   |
| <b>318</b> | PKC delta (phospho S664)             | PKC-delta_pS664       | PRKCD                | Millipore         | 07-875        | Rabbit | 1:75    |
| <b>319</b> | PKCalpha                             | PKCa                  | PRKCA                | CST               | 2056          | Rabbit | 1:200   |
| <b>320</b> | PKM2                                 | PKM2                  | PKM                  | CST               | 4053          | Rabbit | 1:300   |
| <b>321</b> | PLC gamma2 (phospho Y759)            | PLC-gamma2_pY759      | PLCG2                | CST               | 3874          | Rabbit | 01:25   |
| <b>322</b> | PLK1                                 | PLK1                  | PLK1                 | CST               | 4513          | Rabbit | 1:125   |
| <b>323</b> | Met (phospho Y1234/Y1235)            | c-Met_pY1234_Y1235    | MET                  | CST               | 3129          | Rabbit | 1:100   |
| <b>324</b> | PMS2                                 | PMS2                  | PMS2                 | Novus Biologicals | 22510002      | Rabbit | 1:1500  |
| <b>325</b> | PRAS40                               | PRAS40                | AKT1S1               | Life Technologies | AHO1031       | Mouse  | 1:75    |
| <b>326</b> | PRAS40 (phospho T246)                | PRAS40_pT246          | AKT1S1               | Life Technologies | 441100G       | Rabbit | 1:500   |
| <b>327</b> | PREX1                                | PREX1                 | PREX1                | Abcam             | ab102739      | Rabbit | 1:100   |
| <b>328</b> | Progesterone Receptor [YR85]         | PR                    | PGR                  | abcam             | 206926        | Rabbit | 1:500   |
| <b>329</b> | PTEN                                 | PTEN                  | PTEN                 | CST               | 9552          | Rabbit | 1:500   |
| <b>330</b> | PTPN12                               | PTPN12                | PTPN12               | Abcam             | ab76942       | Rabbit | 1:500   |
| <b>331</b> | Puma                                 | Puma                  | BBC3                 | CST               | 4976          | Rabbit | 1:50    |
| <b>332</b> | PYGB                                 | PYGB                  | PYGB                 | Sigma-Aldrich     | SAB2900066    | Rabbit | 1:750   |
| <b>333</b> | PYGM                                 | PYGM                  | PYGM                 | Novus             | H00005837-M10 | Mouse  | 1:500   |
| <b>334</b> | Pyk2 (phospho Y402)                  | Pyk2_pY402            | PYK2                 | CST               | 3291          | Rabbit | 1:500   |
| <b>335</b> | Pyruvate Dehydrogenase               | PDHA1                 | PDHA1                | CST               | 3205          | Rabbit | 1:200   |
| <b>336</b> | Rab11                                | Rab11                 | RAB11A, B            | CST               | 3539          | Rabbit | 1:30    |
| <b>337</b> | Rab25                                | Rab25                 | RAB25                | CST               | 4314          | Rabbit | 1:30    |
| <b>338</b> | Rac1/Cdc42                           | Cdc42                 | CDC42                | CST               | 4651          | Rabbit | 1:100   |
| <b>339</b> | Rad23A                               | Rad23A                | RAD23A               | CST               | 24555         | Rabbit | 1:1000  |
| <b>340</b> | Rad50                                | Rad50                 | RAD50                | CST               | 3427          | Rabbit | 1:250   |
| <b>341</b> | Rad51                                | Rad51                 | RAD51                | Millipore         | ABE257        | Rabbit | 1:1000  |

|     |                        |               |               |                     |                    |        |          |
|-----|------------------------|---------------|---------------|---------------------|--------------------|--------|----------|
| 342 | Raptor                 | Raptor        | RPTOR         | CST                 | 2280               | Rabbit | 1:300    |
| 343 | Rb                     | Rb            | RB1           | CST                 | 9309               | Mouse  | 1:150    |
| 344 | Rb (phospho S807/811)  | Rb_pS807_S811 | RB1           | CST                 | 9308               | Rabbit | 1:1000   |
| 345 | RBM15                  | RBM15         | RBM15         | Novus               | 21390002           | Rabbit | 1:5000   |
| 346 | Rheb                   | Rheb          | RHEB          | R&D Systems         | MAB3426            | Mouse  | 1:75     |
| 347 | Rictor                 | Rictor        | RICTOR        | CST                 | 2114               | Rabbit | 1:100    |
| 348 | Rictor (phospho T1135) | Rictor_pT1135 | RICTOR        | CST                 | 3806               | Rabbit | 1:200    |
| 349 | RIP                    | RIP           | RIP           | CST                 | 4926               | Rabbit | 1:75     |
| 350 | RIP3                   | RIP3          | RIP3          | CST                 | 13526              | Rabbit | 1:500    |
| 351 | RPA32 (phospho S4/S8)  | RPA32_pS4/S8  | RPA2          | Bethyl              | A300-245A          | Rabbit | 1:250    |
| 352 | RPA32/RPA2             | RPA32         | RPA2          | CST                 | 2208               | Rat    | 1:150    |
| 353 | RRM1                   | RRM1          | RRM1          | CST                 | 3388               | Rabbit | 1:100    |
| 354 | RRM2                   | RRM2          | RRM2          | Life Technologies   | PA527856           | Rabbit | 1:250    |
| 355 | RSK                    | RSK           | RPS6KA1, 2, 3 | CST                 | 9347               | Rabbit | 1:150    |
| 356 | S100A4                 | S100A4        | S100A4        | CST                 | 13018              | Rabbit | 1:1000   |
| 357 | S6 (phospho S235/236)  | S6_pS235_S236 | RPS6          | CST                 | 2211               | Rabbit | 1:2500   |
| 358 | S6 (phospho S240/244)  | S6_pS240_S244 | RPS6          | CST                 | 2215               | Rabbit | 1:1000   |
| 359 | S6 Ribosomal Protein   | S6            | RPS6          | CST                 | 2317               | Mouse  | 1:750    |
| 360 | SCD                    | SCD           | SCD           | Santa Cruz          | sc-58420           | Mouse  | 1:20     |
| 361 | SDHA                   | SDHA          | SDHA          | CST                 | 11998              | Rabbit | 1:250    |
| 362 | SFRP1                  | SFRP1         | SFRP1         | CST                 | 4690               | Rabbit | 1:500    |
| 363 | Shc_pY317              | Shc_pY317     | SHC1          | CST                 | 2431               | Rabbit | 01:25    |
| 364 | SHP-2 (phospho Y542)   | SHP-2_pY542   | PTPN11        | CST                 | 3751               | Rabbit | 1:75     |
| 365 | SHP2 / PTPN11          | SHP2          | PTPN11        | CST                 | 3397               | Rabbit | 1:250    |
| 366 | SLC1A5                 | SLC1A5        | SLC1A5        | Sigma-Aldrich       | HPA035240          | Rabbit | 1:150000 |
| 367 | Slfn11                 | Slfn11        | SLFN11        | Santa Cruz          | sc-374339          | Mouse  | 1:150    |
| 368 | Smac                   | Smac          | DIABLO        | CST                 | 2954               | Mouse  | 1:150    |
| 369 | Smad1                  | Smad1         | SMAD1         | Epitomics/<br>Abcam | 1649-1/<br>ab33902 | Rabbit | 1:500    |
| 370 | Smad3                  | Smad3         | SMAD3         | Epitomics/<br>Abcam | 1735-1/<br>ab40854 | Rabbit | 1:150    |
| 371 | Smad4                  | Smad4         | SMAD4         | Santa Cruz          | sc-7966            | Mouse  | 1:30     |

|     |                              |                  |           |                     |                    |        |         |
|-----|------------------------------|------------------|-----------|---------------------|--------------------|--------|---------|
| 372 | Snail                        | Snail            | SNAI1     | CST                 | 3895               | Mouse  | 1:50    |
| 373 | SOD1                         | SOD1             | SOD1      | CST                 | 4266               | Mouse  | 1:500   |
| 374 | SOD2 (D9V9C)                 | SOD2             | SOD2      | CST                 | 13194              | Rabbit | 1:200   |
| 375 | Sox2                         | Sox2             | SOX2      | CST                 | 2748               | Rabbit | 1:50    |
| 376 | Src                          | Src              | SRC       | Millipore           | 05-184             | Mouse  | 1:50    |
| 377 | Src (phospho Y416)           | Src_pY419        | SRC       | CST                 | 2101               | Rabbit | 1:25    |
| 378 | Src (phospho Y527)           | Src_pY527        | SRC       | CST                 | 2105               | Rabbit | 1:150   |
| 379 | SRSF1/SF2                    | SF2              | SRSF1     | Invitrogen          | 324500             | Mouse  | 1:75    |
| 380 | Stat3                        | Stat3            | STAT3     | CST                 | 4904               | Rabbit | 1:3000  |
| 381 | Stat3 (phospho Y705)         | Stat3_pY705      | STAT3     | CST                 | 9145               | Rabbit | 1:100   |
| 382 | Stat5a                       | Stat5a           | STAT5A    | Epitomics/<br>Abcam | 1289-1/<br>ab32043 | Rabbit | 1:300   |
| 383 | Stathmin-1                   | Stathmin-1       | STMN1     | Epitomics/<br>Abcam | 1972-1/<br>ab52630 | Rabbit | 1:75    |
| 384 | STING                        | STING            | TMEM173   | CST                 | 13647              | Rabbit | 1:250   |
| 385 | Syk                          | Syk              | SYK       | Santa Cruz          | sc-1240            | Mouse  | 1:500   |
| 386 | Tau                          | Tau              | MAPT      | Millipore           | 05-348             | Mouse  | 1:100   |
| 387 | TAZ                          | TAZ              | WWTR1     | CST                 | 4883               | Rabbit | 1:300   |
| 388 | TFAM                         | TFAM             | TFAM      | CST                 | 7495               | Rabbit | 1:300   |
| 389 | Transferrin R                | TFRC             | TFRC      | Novus               | 22500002           | Rabbit | 1:15000 |
| 390 | TIGAR                        | TIGAR            | TIGAR     | Epitomics/<br>Abcam | S1711/<br>ab137573 | Rabbit | 1:100   |
| 391 | Transglutaminase             | Transglutaminase | TGM2      | Lab Vision          | MS-224-P1          | Mouse  | 1:150   |
| 392 | TRIM25                       | TRIM25           | TRIM25    | Abcam               | ab167154           | Rabbit | 1:3000  |
| 393 | TTF1                         | TTF1             | NKX2-1    | Epitomics/<br>Abcam | 2044-1/<br>ab76013 | Rabbit | 1:150   |
| 394 | Tuberin                      | Tuberin          | TSC2      | Epitomics/<br>Abcam | 1613-1/<br>ab32554 | Rabbit | 1:2500  |
| 395 | Tuberin/TSC2 (phospho T1462) | Tuberin_pT1462   | TSC2      | CST                 | 3617               | Rabbit | 1:38    |
| 396 | TUFM                         | TUFM             | TUFM      | Abcam               | ab173300           | Rabbit | 1:38    |
| 397 | TWEAK Receptor/FN14          | FN14             | TNFRSF12A | CST                 | 4403               | Rabbit | 1:1000  |
| 398 | TWIST                        | TWIST            | TWIST1    | Santa Cruz          | sc-81417           | Mouse  | 1:30    |
| 399 | Tyro3                        | Tyro3            | TYRO3     | CST                 | 5585               | Rabbit | 1:30    |
| 400 | UBAC1                        | UBAC1            | UBAC1     | Sigma-Aldrich       | HPA005651          | Rabbit | 1:250   |
| 401 | Ubiquityl-Histone H2B        | U-Histone-H2B    | HIST1H2BB | CST                 | 5546               | Rabbit | 1:500   |

|     |                     |            |                           |                      |                |        |         |
|-----|---------------------|------------|---------------------------|----------------------|----------------|--------|---------|
| 402 | UGT1A               | UGT1A      | UGT1A1, 3, 4, 5, 7, 8, 10 | Santa Cruz           | sc-271268      | Mouse  | 1:75    |
| 403 | ULK1 (phospho S757) | ULK1_pS757 | ULK1                      | CST                  | 6888           | Rabbit | 1:300   |
| 404 | UQCRC2              | UQCRC2     | UQCRC2                    | MitoSciences / Abcam | MS304/ab14745  | Mouse  | 01:50   |
| 405 | UVRAG               | UVRAG      | UVRAG                     | CST                  | 13115          | Rabbit | 1:100   |
| 406 | VASP                | VASP       | VASP                      | CST                  | 3112           | Rabbit | 1:100   |
| 407 | Vav1                | Vav1       | VAV1                      | CST                  | 2502           | Rabbit | 1:500   |
| 408 | VDAC1/Porin         | Porin      | VDAC1                     | Abcam                | ab14734        | Mouse  | 1:100   |
| 409 | VEGF Receptor 2     | VEGFR-2    | KDR                       | CST                  | 2479           | Rabbit | 1:3000  |
| 410 | VHL/EPPK1           | VHL-EPPK1  | EPPK1                     | BD Biosciences       | 556347         | Mouse  | 1:1500  |
| 411 | Vimentin            | Vimentin   | VIM                       | Dako/Fisher          | M0725/MS-129-P | Mouse  | 1:250   |
| 412 | Vinculin            | Vinculin   | VCL                       | Sigma-Aldrich        | SAB4200080     | Mouse  | 1:25000 |
| 413 | Wee1                | Wee1       | WEE1                      | CST                  | 4936           | Rabbit | 1:250   |
| 414 | Wee1 (phospho S642) | Wee1_pS642 | WEE1                      | CST                  | 4910           | Rabbit | 1:50    |
| 415 | WIPI1               | WIPI1      | WIPI1                     | CST                  | 12124          | Rabbit | 1:150   |
| 416 | WIPI2               | WIPI2      | WIPI2                     | CST                  | 8567           | Rabbit | 1:150   |
| 417 | XBP-1               | XBP-1      | XBP1                      | Santa Cruz           | sc-32136       | Goat   | 1:200   |
| 418 | XIAP                | XIAP       | XIAP                      | CST                  | 2042           | Rabbit | 1:100   |
| 419 | XPA                 | XPA        | XPA                       | Santa Cruz           | sc-56813       | Mouse  | 1:75    |
| 420 | XPF                 | XPF        | ERCC4                     | Abcam                | ab73720        | Rabbit | 1:100   |
| 421 | XPG                 | ERCC5      | ERCC5                     | Proteintech Group    | 11331-1-AP     | Rabbit | 1:250   |
| 422 | XRCC1               | XRCC1      | XRCC1                     | CST                  | 2735           | Rabbit | 1:20    |
| 423 | YAP                 | YAP        | YAP1                      | Santa Cruz           | sc-376830      | Mouse  | 1:300   |
| 424 | YAP (phospho S127)  | YAP_pS127  | YAP1                      | CST                  | 4911           | Rabbit | 1:250   |
| 425 | YB1 (phospho S102)  | YB1_pS102  | YBX1                      | CST                  | 2900           | Rabbit | 1:50    |
| 426 | ZAP-70              | ZAP-70     | ZAP70                     | CST                  | 2705           | Rabbit | 1:500   |
