# Supplementary material for: Modeling Heterogeneity of Triple‐Negative Breast Cancer Uncovers a Novel Combinatorial Treatment Overcoming Primary Drug Resistance
Source: PubMed Central journal article supplement (PMC7856896; doi:10.1002/advs.202003049), 2020-12-16
Supplement: ADVS-8-2003049-s007.pdf [file ADVS-8-2003049-s007.pdf]

**Table S6.** Comparisons of RPPA outcomes of MMTV-R26<sup>Met</sup> cells belonging to “subtype A” and “subtype B” versus those from the non-tumorigenic cells.

**Subtype A (MGT4+9+11) vs. non-tumorigenic (MGT2 & 7)**

| Protein              | logFC    | AveExpr    | t        | P.Value   | adj.P.Val  |
|----------------------|----------|------------|----------|-----------|------------|
| P-Met_pY1234_Y1235   | 3,771668 | -1,0119078 | 10,90563 | 6,84E-08  | 5,77E-06   |
| E-Cadherin           | 3,468199 | 1,5253849  | 10,61925 | 9,35E-08  | 5,77E-06   |
| Claudin-7            | 1,911199 | 1,0822876  | 10,33591 | 1,28E-07  | 6,33E-06   |
| RSK                  | 1,524384 | -0,6111489 | 7,299833 | 6,18E-06  | 1,53E-04   |
| CDK1                 | 1,448314 | -0,1166139 | 4,725375 | 4,02E-04  | 0,00183884 |
| ARID1A               | 1,446252 | 0,3963761  | 4,852469 | 3,20E-04  | 0,00155111 |
| Bim                  | 1,416402 | 0,0453894  | 4,942895 | 2,73E-04  | 0,00142332 |
| 53BP1                | 1,269014 | 0,5378448  | 5,401039 | 1,23E-04  | 7,89E-04   |
| Rad50                | 1,061401 | 0,2447965  | 5,410073 | 1,21E-04  | 7,89E-04   |
| HES1                 | 0,981841 | 0,0343482  | 2,795423 | 0,0152226 | 0,03357122 |
| Src_pY416            | 0,958743 | -0,2971786 | 6,696275 | 1,52E-05  | 2,50E-04   |
| ACC_pS79             | 0,939118 | -0,11619   | 2,665268 | 0,0195073 | 0,04054706 |
| Connexin-43          | 0,895784 | 0,2361452  | 3,028428 | 0,0097416 | 0,02382356 |
| FASN                 | 0,887145 | -0,1825017 | 5,620712 | 8,49E-05  | 7,23E-04   |
| Src_pY527            | 0,883245 | -0,1438668 | 4,22756  | 9,98E-04  | 0,00347248 |
| Rb_pS807_S811        | 0,870722 | -0,0627291 | 2,38951  | 0,0328075 | 0,06157929 |
| ACC1                 | 0,865206 | 0,0651942  | 4,657714 | 4,54E-04  | 0,00196783 |
| Cox2                 | 0,828262 | 0,6923661  | 1,422211 | 0,1786289 | 0,24648788 |
| 4E-BP1_pS65          | 0,794498 | 0,2176293  | 6,006903 | 4,49E-05  | 5,28E-04   |
| GCN5L2               | 0,78403  | 0,1609002  | 5,658902 | 7,96E-05  | 7,23E-04   |
| Akt_pS473            | 0,760644 | -0,29258   | 4,279576 | 9,06E-04  | 0,00334177 |
| C-Jun_pS73           | 0,687669 | 0,1712913  | 6,835796 | 1,23E-05  | 2,17E-04   |
| p90RSK_pT573         | 0,660934 | -0,1175991 | 5,401963 | 1,23E-04  | 7,89E-04   |
| PARP                 | 0,639323 | 0,189449   | 6,210382 | 3,24E-05  | 4,44E-04   |
| Akt_pT308            | 0,631021 | -0,1776652 | 3,715662 | 0,0026124 | 0,00750295 |
| HER3                 | 0,584665 | 0,4124621  | 4,245167 | 9,66E-04  | 0,00340895 |
| C-Raf_pS338          | 0,560357 | -6,44E-04  | 5,077137 | 2,15E-04  | 0,0011679  |
| PKC-b-II_pS660       | 0,557357 | -0,279136  | 5,524983 | 9,97E-05  | 7,73E-04   |
| IRS1                 | 0,543443 | 0,197673   | 1,828737 | 0,0905815 | 0,1399653  |
| VASP                 | 0,536384 | -0,1346535 | 3,548721 | 0,0035909 | 0,00996573 |
| c-Myc                | 0,536074 | 0,1818384  | 5,782582 | 6,48E-05  | 6,96E-04   |
| beta-Catenin         | 0,520031 | 0,2023753  | 3,444927 | 0,0043796 | 0,01163174 |
| eIF4E                | 0,500608 | -0,0795851 | 7,337273 | 5,85E-06  | 1,53E-04   |
| 4E-BP1               | 0,49076  | 0,0226499  | 2,387859 | 0,0329088 | 0,06157929 |
| Notch1               | 0,475117 | -0,2848443 | 2,481032 | 0,027637  | 0,0541772  |
| p16_INK4a            | 0,460764 | 0,1754814  | 2,047757 | 0,061451  | 0,10328628 |
| Caspase-3            | 0,432888 | 0,0986794  | 7,15535  | 7,63E-06  | 1,63E-04   |
| RPA32_pS4_S8         | 0,422635 | -0,0877175 | 4,922764 | 2,83E-04  | 0,00142496 |
| NDRG1_pT346          | 0,421693 | 0,3033009  | 0,904163 | 0,3824397 | 0,47708386 |
| RBM15                | 0,419121 | 0,4528309  | 1,104033 | 0,2896937 | 0,37859436 |
| Paxillin             | 0,399942 | -0,0701099 | 8,728997 | 8,82E-07  | 3,63E-05   |
| PAICS                | 0,395387 | 0,2794241  | 2,228145 | 0,0442483 | 0,07751302 |
| Bcl-xL               | 0,392312 | 0,1383302  | 4,062771 | 0,001357  | 0,00424273 |
| 14-3-3_zeta          | 0,388742 | -0,0596922 | 4,658633 | 4,53E-04  | 0,00196783 |
| Bid                  | 0,381066 | 0,1070465  | 3,283919 | 0,0059639 | 0,01534459 |
| HER2_pY1248          | 0,3781   | 0,0388001  | 2,664526 | 0,0195348 | 0,04054706 |
| FAK                  | 0,377805 | -0,0713128 | 5,6286   | 8,38E-05  | 7,23E-04   |
| Histone-H3           | 0,376417 | 0,0086542  | 3,004335 | 0,0102027 | 0,02470651 |
| p38_pT180_Y182       | 0,363108 | 0,0857146  | 5,278316 | 1,52E-04  | 9,11E-04   |
| Shc_pY317            | 0,352321 | -0,2506858 | 4,326449 | 7,92E-04  | 0,00305704 |
| C-Kit                | 0,345628 | 0,1667719  | 5,504168 | 1,03E-04  | 7,73E-04   |
| AMPK_alpha           | 0,343258 | -0,1949831 | 3,730602 | 0,0025393 | 0,00737877 |
| PRAS40_pT246         | 0,333433 | -0,1478686 | 1,602546 | 0,1331629 | 0,19578124 |
| Smad3                | 0,32264  | 0,1278642  | 4,631279 | 4,76E-04  | 0,00202851 |
| Hsp70                | 0,316225 | 0,0233271  | 5,182729 | 1,78E-04  | 0,00102115 |
| WIPI1                | 0,299004 | 0,2067124  | 1,857936 | 0,0860821 | 0,13542849 |
| PKD1                 | 0,288736 | -0,0743783 | 4,052317 | 0,0013838 | 0,00427252 |
| PAK1                 | 0,288257 | -0,0960324 | 2,062203 | 0,2493386 | 0,3329007  |
| Bax                  | 0,282279 | -0,0402982 | 0,891662 | 0,3888601 | 0,48265551 |
| DJ-1                 | 0,28216  | 0,1007253  | 4,336833 | 8,16E-04  | 0,00309901 |
| IR-b                 | 0,271336 | 0,0634504  | 1,320554 | 0,2095391 | 0,28437448 |
| Lck                  | 0,270305 | 0,0645107  | 2,784147 | 0,0155539 | 0,0339984  |
| Merlin               | 0,25649  | 0,0583102  | 2,001088 | 0,0668193 | 0,11002916 |
| TUFM                 | 0,255489 | 0,0967286  | 3,668656 | 0,0028567 | 0,00811037 |
| Myt1                 | 0,251577 | -0,0590917 | 3,421506 | 0,0045805 | 0,01203606 |
| PKD1_pS241           | 0,24966  | 0,0705303  | 1,828203 | 0,0906658 | 0,1399653  |
| ATM                  | 0,248594 | 0,0743071  | 1,061881 | 0,3077141 | 0,40002836 |
| ER-alpha_pS118       | 0,247404 | 0,1571599  | 4,543131 | 5,59E-04  | 0,00222667 |
| Bad_pS112            | 0,246678 | -0,1849946 | 3,61229  | 0,0031806 | 0,00892728 |
| Caspase-7_cleavedD19 | 0,233133 | -0,1285137 | 2,305651 | 0,0383474 | 0,06814244 |
| Bak                  | 0,22832  | -0,0479864 | 3,170981 | 0,0074085 | 0,01848373 |
| Chk2_pT68            | 0,22803  | -0,034172  | 2,891423 | 0,0126689 | 0,02897413 |
| Wee1_pS642           | 0,223293 | 0,1465578  | 2,56915  | 0,0234061 | 0,04700253 |
| Elk1_pS383           | 0,217788 | -0,0541057 | 4,129958 | 0,0011969 | 0,00394175 |
| Cdc2_pY15            | 0,208341 | 0,0433277  | 1,556484 | 0,1437134 | 0,20758604 |
| b-Actin              | 0,207393 | 0,1279735  | 1,793327 | 0,0963213 | 0,14686021 |
| EGFR_pY1173          | 0,201168 | -0,0426149 | 4,551783 | 5,50E-04  | 0,00222667 |
| STING                | 0,200475 | 0,1379571  | 0,41888  | 0,6821762 | 0,75222104 |
| ATR_pS428            | 0,192485 | 0,00212    | 3,993173 | 0,0015462 | 0,00465732 |

**Subtype B (MGT13) vs. non-tumorigenic (MGT2 & 7)**

| Protein              | logFC    | AveExpr    | t        | P.Value   | adj.P.Val  |
|----------------------|----------|------------|----------|-----------|------------|
| P-Met_pY1234_Y1235   | 4,563148 | -1,6674278 | 44,05051 | 1,05E-09  | 2,60E-07   |
| RSK                  | 2,114524 | -0,7602672 | 6,313678 | 4,25E-04  | 0,00656047 |
| Notch1               | 2,029212 | 0,2558908  | 10,54554 | 1,68E-05  | 5,19E-04   |
| HES1                 | 1,627067 | 0,0519271  | 6,696406 | 2,98E-04  | 0,0056618  |
| Fibronectin          | 1,565388 | -0,9234731 | 10,57193 | 1,65E-05  | 5,19E-04   |
| ACC_pS79             | 1,380298 | -0,174792  | 3,366794 | 0,0122547 | 0,05132152 |
| CDK1                 | 1,366848 | -0,5335007 | 3,823602 | 0,0067068 | 0,03524618 |
| Rb_pS807_S811        | 1,304012 | -0,1066745 | 2,532854 | 0,0395758 | 0,11217854 |
| Akt_pS473            | 1,265382 | -0,2390729 | 11,70825 | 8,45E-06  | 3,64E-04   |
| IGF1Rb               | 1,122679 | 0,5041849  | 4,190776 | 0,004226  | 0,03070037 |
| Bim                  | 1,058487 | -0,4815593 | 7,109478 | 2,07E-04  | 0,00451158 |
| Src_pY416            | 1,017153 | -0,5250009 | 18,32814 | 4,21E-07  | 5,08E-05   |
| Akt_pT308            | 0,99835  | -0,1866618 | 7,260346 | 1,82E-04  | 0,00448387 |
| PKA-a                | 0,965586 | 0,2854551  | 17,31854 | 6,17E-07  | 5,08E-05   |
| ACC1                 | 0,852846 | -0,1682892 | 3,899131 | 0,0060888 | 0,03379328 |
| FASN                 | 0,838035 | -0,4375213 | 3,49291  | 0,0103442 | 0,0464548  |
| LRP6_pS1490          | 0,671783 | 0,1657914  | 11,62867 | 8,84E-06  | 3,64E-04   |
| p90RSK_pT573         | 0,607544 | -0,3147928 | 3,325557 | 0,0129593 | 0,05334913 |
| Shc_pY317            | 0,593491 | -0,2402474 | 6,355699 | 4,08E-04  | 0,00656047 |
| AMPK_pT172           | 0,585846 | 0,8578037  | 3,89801  | 0,0060975 | 0,03379328 |
| Pdcd4                | 0,584895 | 0,116794   | 3,924916 | 0,0058923 | 0,03379328 |
| PKC-b-II_pS660       | 0,563848 | -0,4233496 | 5,389217 | 0,0010738 | 0,01386302 |
| STING                | 0,544972 | 0,2327264  | 3,055622 | 0,0187941 | 0,06981802 |
| MCT4                 | 0,534748 | 0,5135805  | 0,88172  | 0,4076264 | 0,52833899 |
| AMPK_alpha           | 0,481    | -0,2264803 | 4,409915 | 0,003239  | 0,02424311 |
| PRAS40_pT246         | 0,470494 | -0,177067  | 8,623494 | 6,16E-05  | 0,00169047 |
| IR-b                 | 0,453404 | 0,0699186  | 1,657671 | 0,1420237 | 0,25420179 |
| STAT5-alpha          | 0,451643 | 0,587122   | 2,638098 | 0,0339911 | 0,10494747 |
| HER2_pY1248          | 0,445391 | -0,0320792 | 4,41123  | 0,0032339 | 0,02424311 |
| Tuberin              | 0,432484 | 0,1376954  | 4,905013 | 0,0018226 | 0,01911688 |
| SLC1A5               | 0,412054 | 0,3457002  | 2,460839 | 0,0439391 | 0,11545689 |
| Src_pY527            | 0,410403 | -0,5794568 | 1,690426 | 0,1354647 | 0,24602776 |
| Paxillin             | 0,406428 | -0,1728096 | 7,041667 | 2,19E-04  | 0,00451158 |
| Bad_pS112            | 0,397009 | -0,1856245 | 4,420566 | 0,0031979 | 0,02424311 |
| Caspase-7_cleavedD19 | 0,371346 | -0,130765  | 3,639518 | 0,0085192 | 0,04125948 |
| XRCC1                | 0,366656 | 0,0387943  | 3,039203 | 0,0192347 | 0,06986708 |
| IGF1R_pY1135_Y1136   | 0,348902 | 0,1505626  | 3,239624 | 0,0145717 | 0,05900362 |
| Bid                  | 0,345436 | -0,0087244 | 2,510036 | 0,0409076 | 0,11226863 |
| Mcl-1                | 0,334732 | 0,3562144  | 2,893978 | 0,0235855 | 0,08205113 |
| RIP1                 | 0,325051 | 0,1058554  | 1,440921 | 0,193453  | 0,30269376 |
| ATM                  | 0,31833  | 0,0386307  | 0,832604 | 0,4329695 | 0,55411127 |
| COG3                 | 0,306351 | 0,0145778  | 4,422202 | 0,0031917 | 0,02424311 |
| 14-3-3_zeta          | 0,305893 | -0,199224  | 5,347493 | 0,0011225 | 0,01386302 |
| eIF4E                | 0,300825 | -0,2972351 | 4,907438 | 0,0018176 | 0,01911688 |
| WIPI1                | 0,299748 | 0,1281728  | 3,925854 | 0,0058853 | 0,03379328 |
| mTOR                 | 0,29646  | -0,0801046 | 4,04117  | 0,0050885 | 0,03307519 |
| MAPK_pT202_Y204      | 0,294888 | -0,0230378 | 2,702394 | 0,0309894 | 0,09801214 |
| Chk2_pT68            | 0,285975 | -0,0694781 | 3,509896 | 0,0101125 | 0,04625544 |
| PAK1                 | 0,283941 | -0,1739056 | 1,541461 | 0,1677734 | 0,28383578 |
| Wee1                 | 0,282046 | 0,180511   | 1,947076 | 0,0932163 | 0,18604001 |
| p21                  | 0,275143 | -0,1092629 | 3,873219 | 0,0062935 | 0,03379328 |
| Myt1                 | 0,267636 | -0,1185596 | 3,748261 | 0,007392  | 0,03651662 |
| FAK                  | 0,266835 | -0,2185122 | 3,366532 | 0,012259  | 0,05132152 |
| YB1_pS102            | 0,248129 | -0,0819382 | 3,803376 | 0,0068837 | 0,03529816 |
| Caspase-3            | 0,244179 | -0,0963645 | 4,070668 | 0,0049042 | 0,03273887 |
| 4E-BP1_pS65          | 0,236739 | -0,2309479 | 1,380441 | 0,2105612 | 0,32505382 |
| PLC-gamma2_pY759     | 0,23491  | 0,0072565  | 2,118022 | 0,0725491 | 0,1585807  |
| Bak                  | 0,215446 | -0,11372   | 2,249705 | 0,0598096 | 0,14342683 |
| UBAC1                | 0,214845 | -0,092247  | 3,790107 | 0,0070025 | 0,03529816 |
| Bax                  | 0,208181 | -0,146502  | 2,8076   | 0,026662  | 0,08780673 |
| GATA6                | 0,201924 | -0,0159812 | 2,874659 | 0,0242395 | 0,08315488 |
| Cdc2_pY15            | 0,197787 | -0,0161427 | 0,987127 | 0,3569608 | 0,49533325 |
| PI3K-p85             | 0,197071 | 0,0344005  | 0,548609 | 0,6005859 | 0,70571753 |
| GCN5L2               | 0,19554  | -0,298807  | 0,966581 | 0,3664395 | 0,50283648 |
| PARP                 | 0,19536  | -0,1694338 | 1,365077 | 0,2151167 | 0,32798665 |
| Histone-H3           | 0,194263 | -0,1688665 | 2,039951 | 0,081353  | 0,16967817 |
| Stathmin             | 0,       |            |          |           |            |

|                    |           |            |          |           |            |
|--------------------|-----------|------------|----------|-----------|------------|
| DM-K9-Histone-H3   | 0,191106  | -0,032935  | 2,955169 | 0,0112119 | 0,02688678 |
| eEF2               | 0,187505  | 0,0403709  | 1,234271 | 0,2390563 | 0,32090713 |
| Rictor             | 0,187175  | -0,0121124 | 2,449399 | 0,0293286 | 0,05615625 |
| elF4G              | 0,186366  | 0,0353867  | 3,198586 | 0,0070258 | 0,017708   |
| EGFR               | 0,182966  | -0,0770142 | 2,536964 | 0,0248733 | 0,04954598 |
| MSH6               | 0,182251  | 0,1297574  | 1,5399   | 0,1476837 | 0,21208063 |
| MEK1_pS217_S221    | 0,17823   | 0,0065781  | 3,843738 | 0,0020492 | 0,00602553 |
| XRCC1              | 0,173953  | 0,002085   | 1,931898 | 0,0755753 | 0,12362311 |
| p27_pT198          | 0,17211   | 0,0723343  | 2,328813 | 0,0367341 | 0,06622864 |
| Gab2               | 0,171561  | 0,0479602  | 0,624194 | 0,5433525 | 0,62422358 |
| NAPSIN-A           | 0,170103  | -0,1065433 | 2,9256   | 0,0118658 | 0,02764966 |
| UBAC1              | 0,166895  | -0,0687808 | 2,357465 | 0,0348277 | 0,06419738 |
| Jagged1            | 0,158894  | 0,1041255  | 0,993534 | 0,3386726 | 0,43119655 |
| TAZ                | 0,153525  | 0,1660362  | 2,347866 | 0,0354557 | 0,06439373 |
| p53                | 0,147901  | -0,0309641 | 1,44288  | 0,172831  | 0,24118219 |
| Notch3             | 0,144246  | 0,0288049  | 2,942955 | 0,0114776 | 0,02699964 |
| PAR                | 0,143159  | 0,7936152  | 0,264154 | 0,7958228 | 0,84364046 |
| Stathmin           | 0,139431  | -0,1300271 | 1,902231 | 0,079641  | 0,12857082 |
| mTOR               | 0,136343  | -0,1136771 | 1,652966 | 0,1223894 | 0,18321324 |
| Aurora-B           | 0,133051  | -0,0498797 | 1,806192 | 0,0941993 | 0,14451695 |
| YB1_pS102          | 0,130054  | -0,0982415 | 1,779569 | 0,0986378 | 0,14946961 |
| PLC-gamma2_pY759   | 0,119652  | -0,0105832 | 1,610908 | 0,131321  | 0,19539936 |
| AMPK-a2_pS345      | 0,115932  | -0,1005424 | 1,507819 | 0,1556308 | 0,22220123 |
| Tuberin            | 0,115824  | 0,0325309  | 1,403352 | 0,1840597 | 0,25117539 |
| Tyros3             | 0,092494  | -0,0121462 | 1,858878 | 0,0859403 | 0,13542849 |
| p27-Kip-1          | 0,091811  | -0,0645913 | 2,350207 | 0,0353015 | 0,06439373 |
| FOXO3a_pS318_S321  | 0,088969  | -0,0859653 | 2,14559  | 0,0514697 | 0,08828487 |
| Cyclin_D1          | 0,087443  | -0,0020169 | 1,432363 | 0,175761  | 0,24389313 |
| PEA15_pS116        | 0,085991  | -0,0163314 | 0,631631 | 0,5386309 | 0,62422358 |
| TIGAR              | 0,084525  | 0,0411889  | 0,976319 | 0,3468127 | 0,43929614 |
| b-Catenin_pT41_S45 | 0,079037  | 0,0461708  | 1,01903  | 0,3268706 | 0,41832662 |
| Chk1_pS296         | 0,071257  | -0,0518607 | 1,16746  | 0,264095  | 0,34883135 |
| GCLM               | 0,062402  | -0,0037227 | 1,236505 | 0,2382525 | 0,32090713 |
| Raptor             | 0,049775  | 0,0118633  | 0,593726 | 0,5629346 | 0,64075962 |
| MDM2_pS166         | 0,04399   | -0,1730021 | 0,553736 | 0,5892041 | 0,66758449 |
| Akt                | 0,039874  | -0,0891319 | 0,293054 | 0,7741296 | 0,82774897 |
| DUSP4              | 0,037353  | 0,0838537  | 0,318001 | 0,7555598 | 0,81494878 |
| MAPK_pT202_Y204    | 0,034884  | -0,1252682 | 0,241066 | 0,8132833 | 0,85481267 |
| Rab11              | 0,032688  | -0,048905  | 0,381195 | 0,7092465 | 0,77514998 |
| C-Raf              | 0,030052  | -0,0492449 | 0,301115 | 0,7681125 | 0,82488607 |
| Sox2               | 0,028709  | 0,2078454  | 0,150345 | 0,8828119 | 0,90329557 |
| NF-kB-p65_pS536    | 0,027659  | 0,0087904  | 0,245802 | 0,8096926 | 0,85467557 |
| YAP                | 0,026607  | -0,0505988 | 0,45738  | 0,654985  | 0,72874462 |
| clAP               | 0,014036  | -0,0504367 | 0,346067 | 0,7348567 | 0,79609472 |
| Ets-1              | 0,006433  | 0,0497873  | 0,147502 | 0,8850102 | 0,90329557 |
| Wee1               | 0,005595  | 0,0635073  | 0,032864 | 0,9742851 | 0,97428513 |
| IGF1R_pY1135_Y1136 | 0,003058  | 0,0031501  | 0,042925 | 0,9664169 | 0,9703454  |
| elF4E_pS209        | -0,0069   | 0,0259484  | -0,10684 | 0,9165562 | 0,92403831 |
| U-Histone-H2B      | -0,01159  | -0,0096519 | -0,15162 | 0,8818259 | 0,90329557 |
| JNK2               | -0,01277  | 0,0018004  | -0,1781  | 0,8614012 | 0,8939752  |
| A-Raf              | -0,011623 | 0,0166796  | -0,14277 | 0,8886742 | 0,9033026  |
| XPF                | -0,02234  | -0,1081235 | -0,39114 | 0,7020631 | 0,7707093  |
| HER3_pY1289        | -0,0246   | -0,0026466 | -0,26741 | 0,7933662 | 0,84364046 |
| PI3K-p110-a        | -0,02523  | -0,036344  | -0,46261 | 0,6513318 | 0,72874462 |
| eEF2K              | -0,02755  | 0,178513   | -0,16833 | 0,8689247 | 0,89801002 |
| PI3K-p85           | -0,02841  | -0,069686  | -0,13565 | 0,8941876 | 0,90518167 |
| D-a-Tubulin        | -0,03121  | -0,0398156 | -0,53242 | 0,6034589 | 0,68061341 |
| SLC1A5             | -0,03636  | 0,143932   | -0,19651 | 0,8472655 | 0,88301506 |
| RIP                | -0,03699  | -0,0590641 | -0,21562 | 0,8326489 | 0,87145884 |
| MMP2               | -0,03721  | 0,055784   | -0,96445 | 0,3525077 | 0,44423161 |
| PEA15              | -0,03872  | 0,1718814  | -0,35493 | 0,7283627 | 0,79253564 |
| PKA-a              | -0,04     | -0,1560579 | -0,45884 | 0,6539663 | 0,72874462 |
| LRP6_pS1490        | -0,04168  | -0,1509694 | -0,71962 | 0,4845572 | 0,58099818 |
| mTOR_pS2448        | -0,04959  | -0,1289684 | -0,42059 | 0,6809608 | 0,75222104 |
| p21                | -0,05003  | -0,2618167 | -0,69608 | 0,4986958 | 0,58824698 |
| JNK_pT183_pY185    | -0,05417  | 0,0593339  | -0,62554 | 0,5424947 | 0,62422358 |
| Sifn11             | -0,05446  | -0,0775038 | -0,82271 | 0,425579  | 0,52038616 |
| Smad1              | -0,05639  | 0,0367162  | -0,69372 | 0,500129  | 0,58824698 |
| Rad51              | -0,06129  | 0,2265507  | -0,6108  | 0,5519147 | 0,6311247  |
| Glutamate-D1-2     | -0,06848  | 0,0224619  | -0,73836 | 0,4734825 | 0,57048871 |
| c-Abl              | -0,07024  | -0,0653876 | -1,56494 | 0,1417235 | 0,20591584 |
| IGFBP2             | -0,07332  | -0,0240207 | -0,64764 | 0,528544  | 0,61580364 |
| p70-S6K1           | -0,07489  | 0,1299386  | -0,82936 | 0,4219433 | 0,51850749 |
| IRF-1              | -0,07708  | 0,0617817  | -1,4848  | 0,161554  | 0,22802199 |
| PREX1              | -0,0774   | 0,2077197  | -1,05361 | 0,3113465 | 0,40263137 |
| p38_MAPK           | -0,09257  | 0,0649005  | -0,80506 | 0,4353339 | 0,52969197 |
| Creb               | -0,09465  | 0,0546613  | -2,20983 | 0,0457627 | 0,07960132 |
| PKC-delta_pS664    | -0,10128  | -0,0486037 | -2,32125 | 0,0372539 | 0,06667902 |
| ERCC5              | -0,10161  | -0,0637429 | -0,77106 | 0,4545252 | 0,55033195 |
| 14-3-3_beta        | -0,10446  | -0,0199976 | -2,04436 | 0,0618276 | 0,10328628 |
| GSK-3a-b_pS21_S9   | -0,12418  | 0,0017529  | -0,68567 | 0,505028  | 0,59119387 |
| Mnk1               | -0,12863  | 0,1504279  | -1,1942  | 0,2538398 | 0,33708831 |
| Pdc4               | -0,13265  | -0,2257078 | -0,91752 | 0,3756589 | 0,47100381 |
| VEGFR-2            | -0,13295  | 0,0340055  | -0,86012 | 0,4053808 | 0,50064526 |

|                    |          |            |          |           |             |
|--------------------|----------|------------|----------|-----------|-------------|
| S6_pS240_S244      | 0,127725 | 0,4220785  | 1,371766 | 0,2131229 | 0,32696494  |
| ARID1A             | 0,115095 | -0,5555488 | 0,353378 | 0,7343676 | 0,80617243  |
| DM-K9-Histone-H3   | 0,1107   | -0,1177962 | 1,125894 | 0,2978848 | 0,43027804  |
| PDK1               | 0,106406 | -0,2286699 | 0,953741 | 0,3724603 | 0,50827461  |
| p38_pT180_Y182     | 0,09872  | -0,1233594 | 1,03424  | 0,3359452 | 0,46880484  |
| XPF                | 0,095511 | -0,0517258 | 1,156349 | 0,2860453 | 0,41560697  |
| Raptor             | 0,088684 | 0,0154113  | 0,808989 | 0,4455471 | 0,56435964  |
| C-Kit              | 0,086084 | -0,0356159 | 0,919586 | 0,3888417 | 0,51915619  |
| PI3K-p110-a        | 0,082661 | 0,016552   | 0,925104 | 0,3861591 | 0,51837655  |
| Akt                | 0,081209 | -0,0819331 | 1,179535 | 0,2772956 | 0,40527812  |
| c-Abl              | 0,079637 | 0,0173695  | 1,262439 | 0,2478299 | 0,37010532  |
| PAICS              | 0,07913  | 0,0396074  | 0,710801 | 0,5005479 | 0,61942666  |
| Aurora-B           | 0,075079 | -0,1098153 | 0,899516 | 0,3987164 | 0,52664673  |
| GSK-3a-b_pS21_S9   | 0,07313  | 0,1190676  | 0,398842 | 0,7020784 | 0,77763844  |
| Caveolin-1         | 0,070314 | 0,2043218  | 0,209433 | 0,840166  | 0,88684184  |
| YAP                | 0,068369 | -0,039718  | 1,111025 | 0,3038096 | 0,4362847   |
| IGFBP2             | 0,065561 | 0,0548377  | 0,461112 | 0,658917  | 0,75348374  |
| MSI2               | 0,060932 | 0,120869   | 0,599495 | 0,5680198 | 0,67129616  |
| U-Histone-H2B      | 0,059832 | 0,0240155  | 0,674241 | 0,522123  | 0,63473657  |
| MEK1_pS217_S221    | 0,053707 | -0,0937947 | 0,882184 | 0,4073923 | 0,52833899  |
| Chk1_pS296         | 0,051428 | -0,079152  | 0,534241 | 0,6099673 | 0,71066945  |
| p27_pT198          | 0,050474 | -0,0251875 | 0,621983 | 0,5539641 | 0,66101032  |
| DJ-1               | 0,044436 | -0,0755722 | 0,670191 | 0,5245494 | 0,632473657 |
| p53                | 0,040754 | -0,1158909 | 0,463467 | 0,6573101 | 0,75348374  |
| C-Raf              | 0,03794  | -0,0537902 | 0,312643 | 0,7637999 | 0,82744992  |
| Stat3              | 0,033749 | 0,4534121  | 0,347239 | 0,7387735 | 0,80742064  |
| C-Raf_pS338        | 0,028811 | -0,3762361 | 0,414808 | 0,6908904 | 0,7721716   |
| NAPSIN-A           | 0,026572 | -0,2129188 | 0,285877 | 0,7833742 | 0,84494947  |
| clAP               | 0,026387 | -0,0488455 | 0,417351 | 0,6891158 | 0,7721716   |
| Bcl-xl             | 0,024299 | -0,1228564 | 0,436409 | 0,6758845 | 0,76229901  |
| CD20               | 0,016336 | 0,1297929  | 0,200478 | 0,8468943 | 0,89013995  |
| GCLM               | 0,006495 | -0,0441405 | 0,082951 | 0,9362486 | 0,95240706  |
| c-Jun_pS73         | 0,004896 | -0,302689  | 0,055213 | 0,9575349 | 0,96353153  |
| Smad3              | 0,003638 | -0,0939425 | 0,028646 | 0,9779587 | 0,98193417  |
| MDM2_pS166         | 0,001828 | -0,2026732 | 0,01909  | 0,9853102 | 0,98531024  |
| TUFM               | -0,0077  | -0,0834473 | -0,08199 | 0,9369835 | 0,95240706  |
| MERIT40_pS29       | -0,01226 | 0,1136221  | -0,08342 | 0,935886  | 0,95240706  |
| Wee1_pS642         | -0,01489 | -0,0144094 | -0,11372 | 0,9127006 | 0,94325128  |
| ER-alpha_pS118     | -0,01584 | -0,0209075 | -0,21508 | 0,835933  | 0,88616077  |
| AR                 | -0,01759 | 0,1283755  | -0,14103 | 0,8918789 | 0,92951097  |
| Rictor_pT1135      | -0,02078 | 0,1220186  | -0,14653 | 0,8876933 | 0,929206879 |
| YAP_pS127          | -0,02338 | 0,2413937  | -0,0691  | 0,946876  | 0,95851789  |
| 4E-BP1             | -0,03111 | -0,3304412 | -0,11791 | 0,9094996 | 0,94325128  |
| HER3_pY1289        | -0,03615 | -0,0011075 | -0,25026 | 0,8096846 | 0,86576661  |
| JNK2               | -0,03974 | -0,0063912 | -0,6728  | 0,5229878 | 0,63473657  |
| PR                 | -0,03991 | 0,2736279  | -0,66643 | 0,5268057 | 0,63473657  |
| Stat3_pY705        | -0,04201 | 0,325379   | -0,33924 | 0,7445334 | 0,81013109  |
| PKC-delta_pS664    | -0,04845 | 7,52E-04   | -0,71805 | 0,4963418 | 0,6191738   |
| FoxM1              | -0,04982 | 0,0565277  | -0,50459 | 0,6295739 | 0,72665769  |
| b-Catenin_pT41_S45 | -0,0504  | -0,0301463 | -0,40772 | 0,6958495 | 0,77421098  |
| PDK1_pS241         | -0,05081 | -0,1240855 | -0,22416 | 0,8291295 | 0,88273697  |
| D-a-Tubulin        | -0,05104 | -0,0400841 | -0,60807 | 0,5626368 | 0,66813119  |
| elF4G              | -0,05348 | -0,1165538 | -0,70028 | 0,5066953 | 0,62265539  |
| TIGAR              | -0,05361 | -0,0403032 | -0,8807  | 0,4081404 | 0,52833899  |
| Notch3             | -0,05379 | -0,0941086 | -0,73702 | 0,4854356 | 0,60864262  |
| Rictor             | -0,05741 | -0,1662992 | -0,92512 | 0,3861535 | 0,51837655  |
| NDRG1_pT346        | -0,06058 | -0,0146028 | -0,08866 | 0,9318744 | 0,95240706  |
| Ets-1              | -0,06377 | 0,0180023  | -1,03536 | 0,3354585 | 0,46880484  |
| Sifn11             | -0,06517 | -0,0677315 | -0,79237 | 0,454551  | 0,572827    |
| Rad50              | -0,07267 | -0,5211625 | -0,27644 | 0,7903156 | 0,84873025  |
| RPA32_pS4_S8       | -0,07986 | -0,4145376 | -0,64032 | 0,5426597 | 0,65066474  |
| p44-42-MAPK        | -0,0827  | 0,0931581  | -0,81917 | 0,4400946 | 0,56032659  |
| eEF2               | -0,08428 | -0,1255586 | -0,4373  | 0,6752698 | 0,76229901  |
| CD134              | -0,08434 | 0,1674613  | -1,35055 | 0,2195032 | 0,33262135  |
| p27-Kip-1          | -0,08497 | -0,1645682 | -1,44029 | 0,193626  | 0,30269376  |
| PKM2               | -0,08995 | 0,0966772  | -0,51679 |           |             |

|                   |          |            |          |           |            |
|-------------------|----------|------------|----------|-----------|------------|
| GATA6             | -0,1389  | -0,1986784 | -2,02354 | 0,0641846 | 0,10639995 |
| Jak2              | -0,14217 | 0,0189833  | -2,3765  | 0,0336141 | 0,06242619 |
| PAK4              | -0,14445 | 0,0926862  | -1,13604 | 0,2765507 | 0,36334052 |
| OCT4              | -0,15027 | 0,0565422  | -3,86126 | 0,0019824 | 0,0058994  |
| N-Cadherin        | -0,1619  | -0,0439391 | -1,45835 | 0,1685958 | 0,23660887 |
| P-Cadherin        | -0,16595 | 0,1045818  | -2,04382 | 0,0618881 | 0,10328628 |
| AR                | -0,1731  | 0,0160716  | -1,84732 | 0,0876941 | 0,13709139 |
| COG3              | -0,1775  | -0,2396591 | -1,48881 | 0,1605088 | 0,2278487  |
| CD20              | -0,18028 | -0,0020163 | -2,72244 | 0,0174965 | 0,03757937 |
| MERIT40_p529      | -0,18033 | -0,0059637 | -1,87899 | 0,0829643 | 0,13306605 |
| MSI2              | -0,18129 | -0,0307509 | -2,63475 | 0,0206712 | 0,04240027 |
| FoxM1             | -0,18286 | -0,0487133 | -2,49443 | 0,026949  | 0,05325125 |
| ZAP-70            | -0,20149 | 0,0909259  | -2,62787 | 0,0209426 | 0,04240027 |
| Rab25             | -0,20263 | -0,0678976 | -2,90888 | 0,0122521 | 0,02828296 |
| INPP4b            | -0,20465 | 0,0035981  | -4,54366 | 5,58E-04  | 0,00222667 |
| ER-alpha          | -0,20535 | 0,0807164  | -4,26333 | 9,34E-04  | 0,00334396 |
| FAK_pY397         | -0,21048 | 0,3062533  | -0,70205 | 0,4950855 | 0,58791402 |
| FoxO3a            | -0,21308 | 0,0217331  | -3,44668 | 0,0043649 | 0,01163174 |
| CD134             | -0,21867 | 0,0522217  | -4,13803 | 0,001179  | 0,00393535 |
| ATM_pS1981        | -0,21994 | 0,0095047  | -4,08413 | 0,0013038 | 0,00412884 |
| Caveolin-1        | -0,2202  | 0,0217395  | -0,70632 | 0,4925168 | 0,58768911 |
| TTF1              | -0,22137 | 0,0775741  | -4,47425 | 6,34E-04  | 0,00248458 |
| XPB1              | -0,22244 | 0,0394977  | -5,52061 | 1,00E-04  | 7,73E-04   |
| Rictor_pT1135     | -0,22379 | -0,0240085 | -1,66556 | 0,1198209 | 0,18046192 |
| PKM2              | -0,23357 | -0,026473  | -1,4102  | 0,1820713 | 0,24984234 |
| cdc25C            | -0,23387 | 0,1890208  | -1,90632 | 0,0790684 | 0,12848621 |
| Tuberin_pT1462    | -0,23808 | 0,0478807  | -3,2277  | 0,0066437 | 0,01691757 |
| PD-L1             | -0,25607 | 0,0026159  | -6,13692 | 3,64E-05  | 4,69E-04   |
| Hexokinase-II     | -0,25661 | 0,0195186  | -3,05028 | 0,0093414 | 0,02307335 |
| Beclin            | -0,26967 | 0,0575019  | -5,26686 | 1,55E-04  | 9,11E-04   |
| SDHA              | -0,27331 | -0,1385362 | -4,27001 | 9,23E-04  | 0,00334396 |
| B-Raf_pS445       | -0,27469 | 0,0216048  | -2,79904 | 0,0151178 | 0,03357122 |
| MIF               | -0,28066 | -0,0150759 | -4,2845  | 8,98E-04  | 0,00334177 |
| G6PD              | -0,28562 | -0,094455  | -2,45428 | 0,0290612 | 0,056079   |
| DM-Histone-H3     | -0,28801 | 0,0980327  | -4,60032 | 5,04E-04  | 0,00210991 |
| BRD4              | -0,30036 | -0,0010115 | -4,09225 | 0,0012842 | 0,00411945 |
| PR                | -0,30594 | 0,0789249  | -6,64866 | 1,63E-05  | 2,52E-04   |
| CD4               | -0,3083  | 0,0887386  | -4,15699 | 0,0011381 | 0,00385073 |
| WIPI2             | -0,31893 | 0,1039822  | -1,59248 | 0,1354101 | 0,19790704 |
| B7-H4             | -0,33225 | 0,0212483  | -4,74741 | 3,86E-04  | 0,00180088 |
| p44-42-MAPK       | -0,33678 | -0,104557  | -2,86825 | 0,0132437 | 0,02973803 |
| TSC1              | -0,33822 | -0,0948599 | -1,60718 | 0,13214   | 0,19544057 |
| SHP-2_pY542       | -0,35906 | -0,0189077 | -4,10303 | 0,0012586 | 0,0040904  |
| Mcl-1             | -0,36634 | 0,0408638  | -1,86243 | 0,0854074 | 0,13542849 |
| TFAM              | -0,38584 | 0,2122181  | -2,6807  | 0,0189432 | 0,03999125 |
| PDHK1             | -0,38987 | -0,0669717 | -6,22144 | 3,18E-05  | 4,44E-04   |
| Fibronectin       | -0,40037 | -0,0245861 | -1,03917 | 0,3177623 | 0,40878793 |
| IGFBP             | -0,40486 | -0,2572525 | -2,41451 | 0,03131   | 0,05948891 |
| SOD2              | -0,42029 | 0,0561037  | -8,10914 | 1,99E-06  | 6,15E-05   |
| PTEN              | -0,44637 | -0,1296311 | -2,87312 | 0,0131207 | 0,02973227 |
| LC3A-B            | -0,44985 | 0,1000738  | -2,23768 | 0,0434784 | 0,07670833 |
| PMS2              | -0,45375 | 0,2736831  | -2,94846 | 0,0113571 | 0,02697308 |
| MEK1              | -0,45539 | 0,2784054  | -3,46083 | 0,0042482 | 0,01153095 |
| Atg7              | -0,46796 | 0,0609753  | -2,73123 | 0,0172061 | 0,03727985 |
| Heregulin         | -0,49019 | -0,0687039 | -2,46804 | 0,0283203 | 0,05507965 |
| YAP_pS127         | -0,49942 | -0,0943395 | -2,17194 | 0,049053  | 0,0847279  |
| Collagen_VI       | -0,50292 | 0,030011   | -5,13438 | 1,95E-04  | 0,00109412 |
| B-Raf             | -0,51067 | 0,0724391  | -5,4379  | 1,16E-04  | 7,89E-04   |
| ULK1_pS757        | -0,51347 | 0,0762755  | -7,12813 | 7,94E-06  | 1,63E-04   |
| Atg3              | -0,51804 | -0,0841261 | -6,85944 | 1,18E-05  | 2,17E-04   |
| Stat3_pY705       | -0,54483 | -0,0338044 | -5,75694 | 6,76E-05  | 6,96E-04   |
| Axl               | -0,56846 | -0,0268375 | -8,15267 | 1,88E-06  | 6,15E-05   |
| HSP27_pS82        | -0,59208 | 0,1358536  | -4,68489 | 4,32E-04  | 0,00194184 |
| LDHA              | -0,65569 | 0,079271   | -4,93506 | 2,77E-04  | 0,00142332 |
| STAT5-alpha       | -0,67924 | -0,0766854 | -4,76584 | 3,74E-04  | 0,00177584 |
| Gys_pS641         | -0,68198 | -0,0642531 | -4,86307 | 3,14E-04  | 0,00155111 |
| Glutaminase       | -0,68524 | -0,0335895 | -4,03746 | 0,0014229 | 0,00433884 |
| MYH11             | -0,68998 | 0,094718   | -3,28948 | 0,0059006 | 0,01534159 |
| S6_pS240_S244     | -0,6902  | -0,1104895 | -2,13149 | 0,0528086 | 0,08995675 |
| TFRC              | -0,69256 | 0,4027866  | -3,52715 | 0,003742  | 0,01026971 |
| PKC-alpha         | -0,72642 | -0,0970691 | -5,45213 | 1,13E-04  | 7,89E-04   |
| Granzyme-B        | -0,78897 | -0,0597221 | -10,6371 | 9,17E-08  | 5,77E-06   |
| p70S6K_pT389      | -0,81525 | -0,0130179 | -4,20323 | 0,0010443 | 0,00358243 |
| Cyclin_B1         | -0,87661 | 0,244537   | -5,39404 | 1,25E-04  | 7,89E-04   |
| AMPK_pT172        | -0,8829  | -0,0045108 | -6,11099 | 3,80E-05  | 4,69E-04   |
| Gys               | -0,90761 | -0,0679323 | -5,7821  | 6,49E-05  | 6,96E-04   |
| Cox-IV            | -0,94707 | 0,1957551  | -5,62421 | 8,44E-05  | 7,23E-04   |
| Myosin-IIa_pS1943 | -0,99755 | 0,160807   | -5,07158 | 2,18E-04  | 0,0011679  |
| PLK1              | -1,01791 | 0,1467133  | -5,59318 | 8,89E-05  | 7,32E-04   |
| MCT4              | -1,02875 | -0,4278113 | -2,6302  | 0,0208504 | 0,04240027 |
| Stat3             | -1,03562 | -0,278021  | -5,65456 | 8,02E-05  | 7,23E-04   |
| TRIM25            | -1,08168 | 0,1025633  | -5,34429 | 1,36E-04  | 8,37E-04   |
| S6_pS235_S236     | -1,21966 | -0,0407079 | -2,6995  | 0,0182779 | 0,03891927 |
| PDGFR-b           | -3,45067 | -0,6152202 | -14,695  | 1,90E-09  | 4,69E-07   |

|                 |          |            |          |           |            |
|-----------------|----------|------------|----------|-----------|------------|
| ZAP-70          | -0,14738 | 0,1672586  | -1,76888 | 0,1209039 | 0,22568701 |
| PDHK1           | -0,14793 | 0,1395381  | -1,46221 | 0,1877337 | 0,30269376 |
| Atg3            | -0,14802 | 0,2110792  | -1,41202 | 0,2014673 | 0,31297125 |
| XPB1            | -0,14841 | 0,1298931  | -2,51885 | 0,0403879 | 0,11217854 |
| DM-Histone-H3   | -0,15033 | 0,2330026  | -2,06291 | 0,0786587 | 0,16835293 |
| IRF-1           | -0,15225 | 0,0498924  | -2,39699 | 0,0482217 | 0,12300738 |
| ATM_pS1981      | -0,16042 | 0,0930213  | -1,84521 | 0,1081839 | 0,20876115 |
| Jak2            | -0,16069 | 0,0485434  | -2,48551 | 0,0423908 | 0,11506704 |
| FoxO3a          | -0,16263 | 0,0995509  | -2,81837 | 0,0262562 | 0,08763892 |
| p38_MAPK        | -0,16318 | 0,0590571  | -1,51641 | 0,173862  | 0,29016159 |
| JNK_pT183_pY185 | -0,16694 | 0,0252905  | -1,63531 | 0,1466713 | 0,26063165 |
| RBM15           | -0,16872 | 0,0903623  | -2,20324 | 0,0640248 | 0,14779565 |
| Rab11           | -0,17184 | -0,1451814 | -1,73941 | 0,1261882 | 0,23260071 |
| Collagen_VI     | -0,17461 | 0,3033535  | -1,10641 | 0,3056669 | 0,43641459 |
| HER3            | -0,1871  | -0,0724925 | -2,16897 | 0,0673238 | 0,14981071 |
| PD-L1           | -0,18744 | 0,0995665  | -3,17387 | 0,0159508 | 0,06155995 |
| Smad4           | -0,18966 | -0,0055285 | -3,21912 | 0,0149875 | 0,05970839 |
| INPP4b          | -0,19469 | 0,0618413  | -2,99018 | 0,0205961 | 0,07372812 |
| B7-H4           | -0,19824 | 0,1663108  | -1,85572 | 0,1065382 | 0,20720414 |
| Mnk1            | -0,20086 | 0,1533918  | -1,46557 | 0,1868452 | 0,30269376 |
| Rad51           | -0,20229 | 0,1822849  | -2,40296 | 0,0478038 | 0,12300738 |
| MEK1            | -0,20639 | 0,5052242  | -1,19607 | 0,2711949 | 0,39872105 |
| Tuberin_pT1462  | -0,21457 | 0,1207483  | -2,28442 | 0,0568454 | 0,13765495 |
| PEA15_pS116     | -0,21797 | -0,1692776 | -1,58466 | 0,1577332 | 0,27352611 |
| B-Raf_pS445     | -0,21915 | 0,1178505  | -2,76894 | 0,0281732 | 0,09156284 |
| CD4             | -0,22355 | 0,2063683  | -2,0594  | 0,0790645 | 0,16835293 |
| EGFR            | -0,23428 | -0,3040888 | -1,44886 | 0,1913027 | 0,30269376 |
| LDHA            | -0,23618 | 0,4319941  | -1,51999 | 0,1729796 | 0,29016159 |
| c-Myc           | -0,23945 | -0,2919121 | -1,83696 | 0,1094939 | 0,20931118 |
| DUSP4           | -0,23995 | -0,0448429 | -1,69424 | 0,1347189 | 0,24602776 |
| Beclin          | -0,2442  | 0,139538   | -3,88753 | 0,0061795 | 0,03379328 |
| 53BP1           | -0,24702 | -0,4465108 | -1,76536 | 0,1215238 | 0,22568701 |
| HSP70           | -0,25318 | -0,3041073 | -2,59833 | 0,0359985 | 0,10715061 |
| Glutamate-D1-2  | -0,25518 | -0,0394912 | -2,01831 | 0,0839767 | 0,17156231 |
| Granzyme-B      | -0,2555  | 0,3769877  | -2,69438 | 0,031348  | 0,09801214 |
| Gys             | -0,25676 | 0,4503697  | -0,97707 | 0,3615775 | 0,49893661 |
| BRD4            | -0,2582  | 0,0962749  | -2,32405 | 0,0536424 | 0,13249685 |
| ER-alpha        | -0,25858 | 0,1120595  | -4,53533 | 0,0027905 | 0,02424311 |
| TTF1            | -0,25943 | 0,1196475  | -4,01472 | 0,0052602 | 0,0333148  |
| Axl             | -0,26673 | 0,252402   | -3,6237  | 0,0086982 | 0,04131634 |
| TFAM            | -0,27437 | 0,3617507  | -1,67315 | 0,1388871 | 0,25040237 |
| Sox2            | -0,27551 | 0,0698959  | -1,448   | 0,1915353 | 0,30269376 |
| SHP-2_pY542     | -0,28024 | 0,1095672  | -2,47284 | 0,0431787 | 0,11545689 |
| SOD2            | -0,2808  | 0,2267275  | -4,88818 | 0,0018575 | 0,01911688 |
| Jagged1         | -0,28263 | -0,1270044 | -2,2353  | 0,0610854 | 0,14507791 |
| MIF             | -0,29557 | 0,0525548  | -4,60683 | 0,0025659 | 0,02424311 |
| p70-S6K1        | -0,29743 | 0,0543159  | -4,58138 | 0,0026435 | 0,02424311 |
| eEF2K           | -0,32344 | 0,0589671  | -2,17741 | 0,0664964 | 0,14931476 |
| PREX1           | -0,33267 | 0,1187313  | -3,05014 | 0,0189385 | 0,06981802 |
| ULK1_pS757      | -0,33353 | 0,2888177  | -3,99062 | 0,0054222 | 0,03348217 |
| P-Cadherin      | -0,33443 | 0,0761427  | -2,94261 | 0,0220207 | 0,07701664 |
| PEA15           | -0,34867 | 0,0492564  | -2,18148 | 0,0661002 | 0,14931476 |
| VASP            | -0,35052 | -0,6562173 | -2,5361  | 0,03939   | 0,11217854 |
| S6_pS235_S236   | -0,36186 | 0,6485896  | -1,32262 | 0,2281608 | 0,34363247 |
| Gys_pS641       | -0,36883 | 0,2498172  | -1,5819  | 0,1583572 | 0,27352611 |
| b-Actin         | -0,37532 | -0,1764572 | -5,26931 | 0,0012205 | 0,01435583 |
| NF-kB-p65_pS536 | -0,40735 | -0,1849384 | -4,54176 | 0,0027694 | 0,02424311 |
| Merlin          | -0,44466 | -0,3098276 | -4,07534 | 0,0048757 | 0,03273887 |
| VEGFR-2         | -0,44476 | -0,0645609 | -2,46791 | 0,0434894 | 0,11545689 |
| PAK4            | -0,45249 | -0,0012319 | -2,34393 | 0,0521064 | 0,13000281 |
| Atg7            | -0,45482 | 0,1900279  | -1,79011 | 0,1172291 | 0,22103502 |
| Glutaminase     | -0,47371 | 0,2377846  | -2,51829 | 0,0404206 | 0,11217854 |
| LC3A-B          | -0,47688 | 0,2071291  | -1,44397 | 0,1926244 | 0,30269376 |
| PMS2            | -0,48922 | 0,378151   | -2,08762 | 0,0758579 | 0,16435883 |
| TFRC            | -0,49996 | 0,6679799  | -1,83278 | 0,1101638 | 0,20931118 |
| B-Raf           | -0,50455 | 0,2097444  | -6,12404 | 5,10E-04  | 0,00740602 |
| TSC1            | -0,50695 | -0,0779737 | -1,56969 | 0,1611479 | 0,27641343 |
| p70S6K_pT389    | -0,52884 | 0,3247387  | -1,98594 | 0,0880579 | 0,17828111 |
| Heregulin       | -0,57913 | 0,0224571  | -2,18899 | 0,0653759 | 0,14931476 |
| MYH11           | -0,66165 | 0,2888351  | -2,30342 | 0,055286  |            |

### Subtype A vs. MGT2

| Protein     | logFC    | AveExpr   | t        | P.Value  | adj.P.Val |
|-------------|----------|-----------|----------|----------|-----------|
| P-Met_pY1   | 3,637657 | -0,512787 | 7,504304 | 1,24E-05 | 4,37E-04  |
| E-Cadherin  | 2,858419 | 2,07281   | 9,734716 | 1,02E-06 | 1,22E-04  |
| Claudin-7   | 1,849309 | 1,334111  | 7,172082 | 1,88E-05 | 4,90E-04  |
| NDRG1_pT    | 1,59218  | 0,143565  | 4,439983 | 0,001011 | 0,0078003 |
| 53BP1       | 1,390249 | 0,675538  | 4,255926 | 0,001372 | 0,0089284 |
| HES1        | 1,388026 | 0,084085  | 3,031517 | 0,011495 | 0,0359412 |
| Src_pY527   | 1,271446 | -0,103271 | 5,51767  | 1,86E-04 | 0,0025465 |
| Bim         | 1,1928   | 0,264333  | 3,052958 | 0,011065 | 0,0350382 |
| RSK         | 0,955445 | -0,315825 | 7,968723 | 7,06E-06 | 3,26E-04  |
| Src_pY416   | 0,946306 | -0,174236 | 4,702663 | 6,59E-04 | 0,0060253 |
| 4E-BP1      | 0,931205 | 0,004343  | 4,626002 | 7,46E-04 | 0,0063553 |
| ARID1A      | 0,902423 | 0,6773    | 2,706231 | 0,020532 | 0,0533842 |
| CDK1        | 0,841402 | 0,176039  | 2,594209 | 0,025065 | 0,0612974 |
| Akt_pT308   | 0,828394 | -0,134122 | 3,761853 | 0,003179 | 0,0153978 |
| p16_INK4a   | 0,821494 | 0,167892  | 3,066624 | 0,010799 | 0,0350382 |
| VASP        | 0,732469 | -0,102788 | 3,829014 | 0,002831 | 0,0145695 |
| Gab2        | 0,711829 | -0,028675 | 2,434552 | 0,033271 | 0,0760914 |
| IR-b        | 0,692957 | 0,020946  | 3,352691 | 0,006502 | 0,024048  |
| PKC-b-II_pS | 0,687287 | -0,232603 | 5,540261 | 1,79E-04 | 0,0025465 |
| HER3        | 0,684612 | 0,467884  | 3,693476 | 0,003579 | 0,0164203 |
| Rad50       | 0,638681 | 0,455258  | 3,340458 | 0,006644 | 0,0241119 |
| PDK1_pS24   | 0,62223  | 0,034216  | 8,196864 | 5,40E-06 | 3,26E-04  |
| Akt_pS473   | 0,603119 | -0,184994 | 2,678357 | 0,021578 | 0,0549461 |
| c-Jun_pS73  | 0,585643 | 0,276401  | 4,455335 | 9,85E-04 | 0,0078003 |
| 4E-BP1_pS1  | 0,535982 | 0,364639  | 3,84237  | 0,002767 | 0,0145413 |
| ACC1        | 0,510477 | 0,238597  | 2,540506 | 0,027575 | 0,0648665 |
| HER2_pY12   | 0,504194 | 0,063467  | 2,666076 | 0,022055 | 0,0555883 |
| FASN        | 0,501761 | -7,63E-04 | 4,079585 | 0,001845 | 0,0109818 |
| C-Raf_pS33  | 0,500747 | 0,080728  | 3,308351 | 0,007032 | 0,0248118 |
| PAICS       | 0,500277 | 0,310122  | 2,043257 | 0,065897 | 0,136744  |
| p38_pT180   | 0,481667 | 0,109864  | 6,322686 | 5,82E-05 | 0,0010269 |
| GCN5L2      | 0,47722  | 0,315373  | 3,78688  | 0,003045 | 0,0153479 |
| STING       | 0,468437 | 0,114471  | 0,704499 | 0,495859 | 0,612386  |
| PARP        | 0,461149 | 0,302319  | 3,968254 | 0,00223  | 0,0122401 |
| eIF4E       | 0,451018 | -0,007555 | 4,968384 | 4,31E-04 | 0,004632  |
| PDK1        | 0,445608 | -0,066556 | 7,13043  | 1,98E-05 | 4,90E-04  |
| Caspase-3   | 0,438372 | 0,152172  | 5,332925 | 2,45E-04 | 0,0031884 |
| 14-3-3_zet  | 0,423332 | -0,017049 | 3,691773 | 0,00359  | 0,0164203 |
| Paxillin    | 0,41394  | -0,022313 | 6,874556 | 2,76E-05 | 6,21E-04  |
| FAK         | 0,407971 | -0,029242 | 5,123623 | 3,38E-04 | 0,004157  |
| Histone-H3  | 0,385838 | 0,054322  | 2,196682 | 0,050528 | 0,1114322 |
| p90RSK_pT   | 0,378022 | 0,017034  | 3,531836 | 0,004745 | 0,01947   |
| Bax         | 0,368331 | -0,020412 | 0,826717 | 0,426078 | 0,5396982 |
| Bcl-xL      | 0,364332 | 0,192799  | 2,719429 | 0,020055 | 0,0526977 |
| Jagged1     | 0,35794  | 0,087936  | 1,749995 | 0,1081   | 0,1964232 |
| c-Myc       | 0,357068 | 0,281863  | 3,662234 | 0,003779 | 0,016971  |
| Shc_pY317   | 0,338664 | -0,203854 | 3,023125 | 0,011668 | 0,0360265 |
| Caveolin-1  | 0,334515 | -0,106836 | 0,950612 | 0,362349 | 0,4775705 |
| RBM15       | 0,334174 | 0,521032  | 0,624377 | 0,545193 | 0,6474162 |
| PRAS40_pT   | 0,323953 | -0,104174 | 1,103932 | 0,293333 | 0,4188231 |
| WIPI1       | 0,304193 | 0,243406  | 1,358826 | 0,201582 | 0,317138  |
| TUFM        | 0,300465 | 0,120711  | 3,217371 | 0,008261 | 0,0283398 |
| beta-Caten  | 0,289844 | 0,309686  | 1,608168 | 0,136277 | 0,2404317 |
| ER-alpha_p  | 0,286177 | 0,181252  | 4,07261  | 0,001867 | 0,0109818 |
| c-Kit       | 0,279571 | 0,222288  | 4,388641 | 0,0011   | 0,0079908 |
| HSP70       | 0,27151  | 0,071262  | 3,377812 | 0,00622  | 0,0240053 |
| DJ-1        | 0,265733 | 0,139229  | 2,994441 | 0,01228  | 0,0369909 |
| RPA32_pS4   | 0,261734 | -0,005264 | 2,862701 | 0,015532 | 0,044098  |
| PLC-gamma   | 0,260835 | -0,021192 | 3,350843 | 0,006523 | 0,024048  |
| ACC_pS79    | 0,251971 | 0,126956  | 0,670382 | 0,516529 | 0,6254047 |
| MSH6        | 0,246726 | 0,140975  | 1,52971  | 0,154501 | 0,2651031 |
| b-Actin     | 0,245096 | 0,147224  | 1,529492 | 0,154554 | 0,2651031 |
| AMPK_alpha  | 0,241763 | -0,133322 | 2,038531 | 0,066434 | 0,136744  |
| Bid         | 0,241507 | 0,180387  | 1,811547 | 0,097594 | 0,1824368 |
| eIF4G       | 0,239594 | 0,049167  | 3,538797 | 0,004687 | 0,01947   |
| Bad_pS112   | 0,238065 | -0,152378 | 2,575245 | 0,025924 | 0,0627778 |

### Subtype B vs. MGT 2

| Protein     | logFC    | AveExpr   | t        | P.Value  | adj.P.Val |
|-------------|----------|-----------|----------|----------|-----------|
| P-Met_pY1   | 4,429137 | -0,83157  | 57,94388 | 2,68E-10 | 6,62E-08  |
| HES1        | 2,033252 | 0,168379  | 33,24106 | 1,09E-08 | 9,01E-07  |
| Notch1      | 1,710942 | 0,731063  | 31,59293 | 1,54E-08 | 9,49E-07  |
| Fibronectin | 1,599821 | 1,178052  | 9,284537 | 4,58E-05 | 4,52E-04  |
| IGFRb       | 1,571705 | 0,517034  | 24,26581 | 8,87E-08 | 3,13E-06  |
| MCT4        | 1,567953 | 0,191969  | 17,06514 | 9,06E-07 | 1,97E-05  |
| RSK         | 1,545585 | -0,170202 | 29,36662 | 2,50E-08 | 1,23E-06  |
| Akt_pT308   | 1,195723 | -0,094465 | 13,88509 | 3,49E-06 | 5,74E-05  |
| Akt_pS473   | 1,162458 | 0,01902   | 12,2847  | 7,70E-06 | 1,06E-04  |
| NDRG1_pT    | 1,109908 | -0,493183 | 19,43433 | 3,85E-07 | 1,06E-05  |
| Src_pY416   | 1,004716 | -0,345657 | 16,91783 | 9,59E-07 | 1,97E-05  |
| PKA-a       | 0,945893 | 0,458861  | 16,1482  | 1,30E-06 | 2,47E-05  |
| IR-b        | 0,875025 | -0,021004 | 6,686059 | 3,40E-04 | 0,0020021 |
| Bim         | 0,834885 | -0,210663 | 10,30311 | 2,37E-05 | 2,93E-04  |
| STING       | 0,812935 | 0,218965  | 8,125268 | 1,05E-04 | 9,25E-04  |
| Src_pY527   | 0,798604 | -0,664382 | 7,787181 | 1,36E-04 | 0,0010837 |
| CDK1        | 0,759937 | -0,056419 | 12,81882 | 5,85E-06 | 9,03E-05  |
| LRP6_pS14   | 0,702505 | 0,268665  | 11,88844 | 9,51E-06 | 1,24E-04  |
| PKC-b-II_pS | 0,693778 | -0,378662 | 9,59041  | 3,73E-05 | 4,39E-04  |
| ACC_pS79    | 0,693151 | 0,336689  | 7,578502 | 1,60E-04 | 0,0012387 |
| AMPK_pT1    | 0,684977 | 0,918582  | 4,163988 | 0,004651 | 0,0149183 |
| SLC1A5      | 0,662634 | 0,316106  | 7,351803 | 1,93E-04 | 0,0013138 |
| Caveolin-1  | 0,625031 | -0,005511 | 6,850821 | 2,95E-04 | 0,0018659 |
| Shc_pY317   | 0,579833 | -0,133043 | 5,338815 | 0,001242 | 0,0061373 |
| HER2_pY12   | 0,571485 | -0,006164 | 8,016517 | 1,14E-04 | 9,50E-04  |
| YAP_pS127   | 0,550479 | 0,007843  | 9,450377 | 4,10E-05 | 4,52E-04  |
| ERCC5       | 0,506844 | -0,006689 | 4,430638 | 0,003387 | 0,0124122 |
| ACC1        | 0,498117 | 0,119805  | 6,114026 | 5,75E-04 | 0,0032184 |
| IGF1R_pY1   | 0,494727 | 0,152044  | 7,286968 | 2,04E-04 | 0,0013228 |
| PRAS40_pT   | 0,461013 | -0,092619 | 7,99944  | 1,15E-04 | 9,50E-04  |
| Tuberin     | 0,455819 | 0,202501  | 5,167735 | 0,001488 | 0,0068051 |
| FASN        | 0,452651 | -0,139704 | 5,22551  | 0,001399 | 0,0065509 |
| MAPK_pT2    | 0,433972 | -0,028119 | 5,953306 | 6,71E-04 | 0,0035067 |
| Rb_pS807    | 0,424155 | 0,468813  | 7,429753 | 1,81E-04 | 0,0013065 |
| Paxillin    | 0,420426 | -0,108736 | 6,765916 | 0,000317 | 0,0019426 |
| 4E-BP1      | 0,409332 | -0,511953 | 6,093394 | 5,86E-04 | 0,0032184 |
| Bad_pS112   | 0,388397 | -0,114121 | 3,819178 | 0,007119 | 0,0204478 |
| AMPK_alpha  | 0,379505 | -0,103425 | 3,568891 | 0,009808 | 0,0259636 |
| PLC-gamma   | 0,376092 | -0,008946 | 4,423101 | 0,003417 | 0,0124122 |
| GSK-3a-b_i  | 0,371556 | 0,012234  | 5,765962 | 8,05E-04 | 0,0040593 |
| Pdcd4       | 0,358724 | 0,30753   | 4,945374 | 0,001892 | 0,0080555 |
| p21         | 0,354248 | -0,093737 | 6,182004 | 5,39E-04 | 0,0030976 |
| COG3        | 0,347162 | 0,050711  | 5,221219 | 0,001406 | 0,0065509 |
| 14-3-3_zet  | 0,340484 | -0,159122 | 5,936645 | 6,81E-04 | 0,0035067 |
| p90RSK_pT   | 0,324632 | -0,097478 | 3,609566 | 0,009304 | 0,0255765 |
| PDK1_pS24   | 0,321764 | -0,281823 | 4,349438 | 0,003726 | 0,0129631 |
| WIPI1       | 0,304937 | 0,177482  | 4,349768 | 0,003725 | 0,0129631 |
| FAK         | 0,297001 | -0,184835 | 5,008786 | 0,001765 | 0,007649  |
| Bax         | 0,294233 | -0,145235 | 5,048647 | 0,001691 | 0,0074564 |
| Caspase-7   | 0,293288 | -0,035883 | 2,760869 | 0,029328 | 0,0619152 |
| WIPI2       | 0,265893 | 0,088879  | 1,838137 | 0,110552 | 0,1870289 |
| PDK1        | 0,263278 | -0,273178 | 3,876257 | 0,006627 | 0,0197203 |
| GATA6       | 0,252854 | -0,001738 | 3,563194 | 0,009881 | 0,0259636 |
| eIF4E       | 0,251234 | -0,225829 | 4,329857 | 0,003814 | 0,0130825 |
| Caspase-3   | 0,249663 | -0,056699 | 3,822671 | 0,007088 | 0,0204478 |
| UB1_pS102   | 0,247645 | -0,039208 | 3,393642 | 0,012343 | 0,030293  |
| UBAC1       | 0,237905 | -0,064641 | 4,115195 | 0,004934 | 0,0154269 |
| p38_pT180   | 0,217278 | -0,15386  | 2,938324 | 0,022889 | 0,0504783 |
| Myt1        | 0,209453 | -0,049406 | 3,66189  | 0,008698 | 0,024413  |
| XRCC1       | 0,207335 | 0,165378  | 2,451464 | 0,045538 | 0,086523  |
| Bid         | 0,205877 | 0,106317  | 2,356773 | 0,052183 | 0,0969118 |
| mTOR        | 0,205357 | 0,006248  | 3,857133 | 0,006787 | 0,0199584 |
| Rictor_pT1  | 0,204619 | 0,028295  | 3,573809 | 0,009746 | 0,0259636 |
| Histone-H3  | 0,203684 | -0,139153 | 1,838476 | 0,110497 | 0,1870289 |
| Chk2_pT68   | 0,203435 | 0,012562  | 3,233    | 0,015298 | 0,0363328 |
| HER3_pY12   | 0,191942 | -0,098544 | 3,108271 | 0,018117 | 0,0414349 |

|            |          |           |          |          |           |
|------------|----------|-----------|----------|----------|-----------|
| p53        | 0,234861 | -0,028158 | 1,717783 | 0,113997 | 0,2055273 |
| Elk1_pS38: | 0,223288 | -0,027692 | 3,153167 | 0,009258 | 0,0304905 |
| EGFR       | 0,218885 | -0,060514 | 3,053962 | 0,011045 | 0,0350382 |
| ERCC5      | 0,21579  | -0,13424  | 2,001351 | 0,070806 | 0,1432118 |
| SLC1A5     | 0,214218 | 0,093795  | 0,925357 | 0,37476  | 0,4872195 |
| TSC1       | 0,209308 | -0,236983 | 1,440225 | 0,177827 | 0,2889694 |
| Smad3      | 0,208068 | 0,189307  | 3,351871 | 0,006511 | 0,024048  |
| Lck        | 0,206677 | 0,110104  | 1,586843 | 0,141034 | 0,2470589 |
| Merlin     | 0,203843 | 0,100168  | 1,149809 | 0,27476  | 0,4057239 |
| HER3_pY1:  | 0,203492 | -0,047216 | 2,946901 | 0,013366 | 0,0393039 |
| Bak        | 0,193494 | -0,012915 | 1,976923 | 0,073823 | 0,1461908 |
| Myt1       | 0,193394 | -0,016846 | 2,059608 | 0,06407  | 0,1341125 |
| NAPSIN-A   | 0,193247 | -0,08934  | 2,482779 | 0,030548 | 0,0705178 |
| UBAC1      | 0,189955 | -0,051966 | 1,969361 | 0,074781 | 0,1465416 |
| Connexin-4 | 0,18699  | 0,477773  | 0,749889 | 0,469156 | 0,5852598 |
| EGFR_pY11  | 0,182097 | -0,013826 | 3,197102 | 0,008563 | 0,028975  |
| Aurora-B   | 0,17813  | -0,041328 | 1,975649 | 0,073983 | 0,1461908 |
| PAK4       | 0,174688 | 0,016478  | 1,855111 | 0,09073  | 0,1723861 |
| GSK-3a-b_f | 0,174242 | -0,068138 | 1,138371 | 0,430172 | 0,5421047 |
| MAPK_pT2   | 0,173967 | -0,146165 | 0,912501 | 0,381192 | 0,4929548 |
| ATR_pS42E  | 0,173213 | 0,029853  | 2,740563 | 0,019313 | 0,0515209 |
| Notch3     | 0,172453 | 0,041833  | 2,738095 | 0,019399 | 0,0515209 |
| VEGFR-2    | 0,161657 | -0,036295 | 0,967953 | 0,353999 | 0,4751501 |
| MEK1_pS2   | 0,160906 | 0,032162  | 2,643838 | 0,022946 | 0,0572498 |
| b-Catenin_ | 0,158045 | 0,041754  | 1,869614 | 0,088544 | 0,1695382 |
| Notch1     | 0,156847 | -0,167172 | 0,700098 | 0,498497 | 0,6125812 |
| Caspase-7_ | 0,155075 | -0,084976 | 1,138371 | 0,279303 | 0,4057239 |
| TAZ        | 0,151172 | 0,185789  | 1,807623 | 0,098235 | 0,1824368 |
| IGF1R_pY1  | 0,148883 | -0,022979 | 2,229583 | 0,047709 | 0,106625  |
| Chk2_pT68  | 0,14549  | 0,009538  | 1,474399 | 0,168586 | 0,2794674 |
| Rictor     | 0,143098 | 0,019462  | 1,386335 | 0,193273 | 0,3079892 |
| Tuberin    | 0,139159 | 0,042867  | 1,276209 | 0,228333 | 0,3481377 |
| Cyclin_D1  | 0,129665 | 0,001313  | 1,650296 | 0,127294 | 0,2261986 |
| TIGAR      | 0,129574 | 0,043638  | 1,09703  | 0,296209 | 0,4188231 |
| YB1_pS102  | 0,12957  | -0,081783 | 1,285143 | 0,225307 | 0,3461398 |
| Glutamate_ | 0,127577 | -0,021805 | 1,417977 | 0,184073 | 0,2971628 |
| IRS1       | 0,116085 | 0,34378   | 0,316469 | 0,757609 | 0,8075234 |
| AMPK-a2_f  | 0,11558  | -0,085886 | 1,095769 | 0,296737 | 0,4188231 |
| PEA15      | 0,11237  | 0,139538  | 0,833019 | 0,422664 | 0,5396982 |
| LC3A-B     | 0,109187 | -0,058193 | 1,065715 | 0,309528 | 0,4319408 |
| PEA15_pS1  | 0,101697 | -0,008363 | 0,556717 | 0,588938 | 0,686168  |
| p27_pT198  | 0,101498 | 0,106837  | 1,053753 | 0,314734 | 0,4355815 |
| eEF2K      | 0,100409 | 0,15178   | 0,451722 | 0,660302 | 0,7379841 |
| FOXO3a_p:  | 0,094894 | -0,075844 | 1,823714 | 0,095631 | 0,1803112 |
| JNK_pT183  | 0,093291 | 0,025704  | 0,959186 | 0,358203 | 0,4756777 |
| p27-Kip-1  | 0,090625 | -0,052819 | 1,913175 | 0,082268 | 0,158752  |
| Akt        | 0,089004 | -0,093046 | 0,474568 | 0,644435 | 0,7235247 |
| WIPI2      | 0,076508 | -0,008059 | 0,424551 | 0,6794   | 0,7491602 |
| YAP_pS127  | 0,074437 | -0,261542 | 0,418235 | 0,683875 | 0,7507427 |
| DM-K9-His: | 0,070306 | 0,013084  | 1,135106 | 0,28061  | 0,4057239 |
| Stathmin   | 0,063385 | -0,09865  | 0,67448  | 0,514019 | 0,6254047 |
| Mnk1       | 0,061391 | 0,099689  | 0,508216 | 0,621402 | 0,7124215 |
| p38_MAPK   | 0,056059 | 0,026224  | 0,387848 | 0,705576 | 0,7685687 |
| PKM2       | 0,046362 | -0,106769 | 0,241959 | 0,813292 | 0,8548214 |
| mTOR       | 0,045241 | -0,079951 | 0,426884 | 0,677751 | 0,7491602 |
| Wee1_pS6   | 0,045056 | 0,207071  | 0,643198 | 0,533358 | 0,6395114 |
| PREX1      | 0,044776 | 0,175763  | 0,55076  | 0,592877 | 0,6875148 |
| IGFRb      | 0,044164 | -0,389855 | 0,427417 | 0,677375 | 0,7491602 |
| MDM2_pS:   | 0,03625  | -0,166058 | 0,330196 | 0,747494 | 0,8062492 |
| p21        | 0,029076 | -0,282497 | 0,317732 | 0,756676 | 0,8075234 |
| clAP       | 0,025597 | -0,050772 | 0,50585  | 0,623008 | 0,7124215 |
| Tyro3      | 0,016713 | 0,013275  | 0,306917 | 0,764675 | 0,8075234 |
| XRCC1      | 0,014632 | 0,052949  | 0,148387 | 0,884739 | 0,9143541 |
| U-Histone- | 0,010909 | -0,015202 | 0,117134 | 0,908879 | 0,9315062 |
| MCT4       | 0,004452 | -0,74516  | 0,017185 | 0,986599 | 0,992555  |
| Rictor_pT1 | 0,001608 | -0,09316  | 0,01033  | 0,991944 | 0,992555  |
| Rad51      | -0,00124 | 0,207918  | -0,00955 | 0,992555 | 0,992555  |
| Rb_pS807_  | -0,00913 | 0,206846  | -0,03008 | 0,976542 | 0,9885487 |
| LRP6_pS14  | -0,01096 | -0,161801 | -0,1418  | 0,889819 | 0,915772  |

|            |           |           |          |          |           |
|------------|-----------|-----------|----------|----------|-----------|
| PKM2       | 0,189979  | -0,030715 | 2,921563 | 0,023427 | 0,0512087 |
| RIP        | 0,187817  | 0,216472  | 1,363352 | 0,216825 | 0,3113704 |
| Gys        | 0,185007  | 0,229644  | 3,15264  | 0,017055 | 0,0393704 |
| PAICS      | 0,18402   | 0,011217  | 1,71356  | 0,132265 | 0,21214   |
| Bak        | 0,18062   | -0,062856 | 1,652588 | 0,144328 | 0,2270633 |
| Elk1_pS38: | 0,175146  | -0,105295 | 2,191381 | 0,066274 | 0,1186205 |
| STAT5-alph | 0,173442  | 0,775827  | 3,072549 | 0,019024 | 0,0431092 |
| Stat3      | 0,173035  | 0,403483  | 3,030139 | 0,020164 | 0,0452767 |
| Mcl-1      | 0,169579  | 0,479658  | 2,567735 | 0,038559 | 0,0767051 |
| FOXO3a_p:  | 0,15269   | -0,06187  | 2,656238 | 0,033999 | 0,0694039 |
| Stat3_pY7C | 0,15226   | 0,240467  | 2,857044 | 0,025629 | 0,0550477 |
| EGFR_pY11  | 0,150863  | -0,072296 | 2,273822 | 0,058821 | 0,1068297 |
| S6_pS240_  | 0,1319    | 0,442304  | 1,231873 | 0,259488 | 0,3580641 |
| ATR_pS42E  | 0,130777  | -0,033401 | 1,752501 | 0,125071 | 0,2059507 |
| Akt        | 0,130338  | -0,087664 | 2,386733 | 0,049979 | 0,0935216 |
| p53        | 0,127715  | -0,143689 | 1,597836 | 0,156039 | 0,2423994 |
| Aurora-B   | 0,120157  | -0,114976 | 1,811734 | 0,114845 | 0,1916666 |
| CD20       | 0,11635   | 0,092588  | 1,985751 | 0,089289 | 0,1553125 |
| Stathmin   | 0,115549  | -0,081181 | 1,278994 | 0,129368 | 0,2102227 |
| mTOR_pS2   | 0,114578  | 0,01004   | 1,580779 | 0,159865 | 0,2467916 |
| Hexokinase | 0,094923  | 0,04622   | 1,717849 | 0,131454 | 0,21214   |
| SDHA       | 0,093427  | 0,182789  | 1,170325 | 0,281823 | 0,3762714 |
| Lck        | 0,08686   | -0,00688  | 1,189175 | 0,274816 | 0,370927  |
| U-Histone- | 0,082333  | 0,025272  | 1,155404 | 0,287475 | 0,3817538 |
| LC3A-B     | 0,082153  | -0,098236 | 1,329239 | 0,227257 | 0,3226006 |
| MEK1       | 0,069103  | 0,359646  | 0,978753 | 0,361722 | 0,4600599 |
| Tyro3      | 0,065279  | 0,038768  | 1,218976 | 0,264039 | 0,3603457 |
| p44-42-MA  | 0,06256   | 0,020878  | 1,091774 | 0,312642 | 0,4085853 |
| Wee1       | 0,057608  | 0,318637  | 0,960062 | 0,370391 | 0,4667683 |
| S6_pS235_  | 0,051162  | 0,42135   | 0,330397 | 0,751193 | 0,8246435 |
| NAPSIN-A   | 0,049716  | -0,217621 | 0,466318 | 0,655773 | 0,7430087 |
| MERIT40_f  | 0,048588  | 0,087179  | 0,412583 | 0,692798 | 0,7813746 |
| TSC1       | 0,040575  | -0,38389  | 0,717029 | 0,497592 | 0,5995378 |
| c-Abl      | 0,040335  | 0,046742  | 0,63463  | 0,546726 | 0,6523741 |
| Collagen_v | 0,040136  | 0,187521  | 0,356881 | 0,732159 | 0,8120777 |
| clAP       | 0,037947  | -0,048946 | 0,566057 | 0,589807 | 0,6904381 |
| TUFM       | 0,037279  | -0,102757 | 0,355465 | 0,733171 | 0,8120777 |
| MEK1_pS2   | 0,036383  | -0,077658 | 0,55098  | 0,599535 | 0,6985145 |
| b-Catenin_ | 0,02861   | -0,070389 | 0,263338 | 0,800207 | 0,8519445 |
| DJ-1       | 0,028009  | -0,061384 | 0,382096 | 0,714224 | 0,8018785 |
| ER-alpha_f | 0,022935  | -0,039132 | 0,296226 | 0,776031 | 0,8336778 |
| Gys_pS641  | 0,021184  | 0,030585  | 0,369732 | 0,722994 | 0,8080525 |
| c-Kit      | 0,020027  | 0,005564  | 0,295583 | 0,776501 | 0,8336778 |
| PARP       | 0,017185  | -0,064674 | 0,149695 | 0,885413 | 0,904904  |
| YAP        | 0,013803  | -0,006171 | 0,246721 | 0,812515 | 0,8576546 |
| PR         | 0,010656  | 0,24656   | 0,198898 | 0,848245 | 0,876638  |
| elF4G      | -2,47E-04 | -0,147012 | -0,00395 | 0,99696  | 0,99696   |
| Bcl-xL     | -0,00368  | -0,107499 | -0,06513 | 0,949972 | 0,9577273 |
| MDM2_pS:   | -0,00591  | -0,199264 | -0,05304 | 0,959248 | 0,9631474 |
| PDHK1      | -0,00776  | 0,058109  | -0,12715 | 0,902555 | 0,9174122 |
| TIGAR      | -0,00856  | -0,067512 | -0,14815 | 0,886586 | 0,904904  |
| DM-K9-His: | -0,0101   | -0,050499 | -0,15294 | 0,882953 | 0,904904  |
| Mnk1       | -0,01085  | 0,042951  | -0,11676 | 0,910477 | 0,9216714 |
| p38_MAPK   | -0,01454  | -0,028369 | -0,20919 | 0,840521 | 0,8723052 |
| XPF        | -0,01589  | 0,009206  | -0,2963  | 0,775978 | 0,8336778 |
| PAK1       | -0,01791  | -0,004488 | -0,30113 | 0,77245  | 0,8336778 |
| JNK_pT183  | -0,01948  | -0,062312 | -0,34436 | 0,74113  | 0,8172287 |
| p27_pT198  | -0,02014  | 0,01171   | -0,25504 | 0,806344 | 0,8547941 |
| FoxM1      | -0,02167  | 0,036726  | -0,24184 | 0,816141 | 0,8578158 |
| 4E-BP1_pS: | -0,02178  | -0,086957 | -0,2319  | 0,823542 | 0,8619269 |
| LDHA       | -0,02473  | 0,306928  | -0,22367 | 0,829685 | 0,8646926 |
| TFAM       | -0,02557  | 0,215198  | -0,29125 | 0,779674 | 0,8336778 |
| Notch3     | -0,02558  | -0,114612 | -0,32481 | 0,755233 | 0,8254095 |
| Atg7       | -0,02732  | -0,058942 | -0,499   | 0,633749 | 0,734911  |
| G6PD       | -0,02819  | 0,018532  | -0,47475 | 0,650055 | 0,7430087 |
| Rab25      | -0,02846  | -0,058297 | -0,46709 | 0,655251 | 0,7430087 |
| C-raf_pS3: | -0,0308   | -0,347453 | -0,4849  | 0,643199 | 0,7423844 |
| B7-H4      | -0,03884  | 0,068568  | -0,70454 | 0,504849 | 0,6053288 |
| PI3K-p110- | -0,04162  | 0,080436  | -0,76123 | 0,472466 | 0,5748723 |

|             |          |           |          |          |           |
|-------------|----------|-----------|----------|----------|-----------|
| PAK1        | -0,0136  | -0,004866 | -0,04448 | 0,965322 | 0,9812126 |
| Rab11       | -0,01981 | -0,035245 | -0,1721  | 0,866507 | 0,9030688 |
| P-Cadherin  | -0,02388 | 0,057863  | -0,30645 | 0,765022 | 0,8075234 |
| GCLM        | -0,02593 | 0,020193  | -0,50009 | 0,626924 | 0,713596  |
| p70-S6K1    | -0,02627 | 0,111673  | -0,21259 | 0,835559 | 0,8745042 |
| MMP2        | -0,02702 | 0,049248  | -0,55704 | 0,588724 | 0,686168  |
| YAP         | -0,02796 | -0,037328 | -0,37465 | 0,715085 | 0,7746759 |
| JNK2        | -0,03743 | 0,004678  | -0,38679 | 0,706336 | 0,7685687 |
| Atg7        | -0,04046 | -0,075657 | -0,30686 | 0,764719 | 0,8075234 |
| Chk1_pS29   | -0,04384 | -0,021965 | -0,73728 | 0,476481 | 0,5914106 |
| Hexokinase  | -0,0487  | -0,050583 | -0,80062 | 0,440407 | 0,5521855 |
| Ets-1       | -0,04892 | 0,060662  | -0,97684 | 0,349774 | 0,4746931 |
| Creb        | -0,05367 | 0,035296  | -1,02208 | 0,328831 | 0,4487363 |
| Cox2        | -0,05874 | 0,957895  | -0,08284 | 0,935477 | 0,9548053 |
| PKA-a       | -0,05969 | -0,157512 | -0,4941  | 0,631013 | 0,7149549 |
| FAK_pY397   | -0,06338 | 0,253015  | -0,15167 | 0,882213 | 0,9143541 |
| PMS2        | -0,07143 | 0,147057  | -0,59999 | 0,560745 | 0,6626989 |
| N-Cadherin  | -0,07154 | -0,080749 | -0,47941 | 0,641096 | 0,7230625 |
| Smad1       | -0,07287 | 0,032616  | -0,65233 | 0,527671 | 0,6357796 |
| CD20        | -0,08026 | -0,042893 | -1,05163 | 0,315664 | 0,4355815 |
| NF-kB-p65   | -0,08295 | 0,032383  | -0,56537 | 0,583242 | 0,6860037 |
| mTOR_pS2    | -0,08552 | -0,128678 | -0,52021 | 0,61329  | 0,7078633 |
| Sifn11      | -0,08637 | -0,078558 | -0,96595 | 0,354957 | 0,4751501 |
| GATA6       | -0,08797 | -0,225422 | -0,96402 | 0,355882 | 0,4751501 |
| Rab25       | -0,08902 | -0,114058 | -1,14255 | 0,277638 | 0,4057239 |
| Jak2        | -0,09052 | -0,008305 | -1,16934 | 0,267136 | 0,3974848 |
| IRF-1       | -0,09924 | 0,056109  | -1,47526 | 0,168358 | 0,2794674 |
| D-a-Tubulin | -0,10018 | -0,031204 | -1,40656 | 0,187348 | 0,3004864 |
| eEF2        | -0,10324 | 0,116836  | -0,63082 | 0,541127 | 0,6456925 |
| Tuberin_pI  | -0,10398 | -0,006469 | -1,31947 | 0,213982 | 0,3324126 |
| ATM_pS19    | -0,10456 | -0,039159 | -2,17966 | 0,052048 | 0,1137689 |
| Raptor      | -0,10909 | 0,047014  | -1,25124 | 0,236964 | 0,3590808 |
| c-Abl       | -0,10954 | -0,067083 | -1,96493 | 0,075347 | 0,1465416 |
| ZAP-70      | -0,10962 | 0,048859  | -1,13442 | 0,280886 | 0,4057239 |
| Cdc2_pY15   | -0,11392 | 0,128145  | -1,08775 | 0,300112 | 0,4211795 |
| MERIT40_r   | -0,11948 | -0,039726 | -1,17769 | 0,263926 | 0,3950895 |
| OCT4        | -0,12349 | 0,032758  | -2,62763 | 0,023618 | 0,0583365 |
| eIF4E_pS2C  | -0,12707 | 0,046931  | -2,2271  | 0,047917 | 0,106625  |
| XPF         | -0,13373 | -0,090681 | -2,36272 | 0,037769 | 0,0855867 |
| COG3        | -0,13669 | -0,269422 | -0,82924 | 0,424707 | 0,5396982 |
| TFAM        | -0,13704 | 0,118415  | -0,8328  | 0,422781 | 0,5396982 |
| cdc25C      | -0,13826 | 0,142199  | -0,92531 | 0,374784 | 0,4872195 |
| BRD4        | -0,1446  | -0,06714  | -2,08815 | 0,060995 | 0,1289559 |
| PI3K-p110-  | -0,14952 | -0,016923 | -3,41611 | 0,005814 | 0,0231627 |
| FoxM1       | -0,15471 | -0,076849 | -1,74971 | 0,108152 | 0,1964232 |
| C-Raf       | -0,15709 | -0,011436 | -1,46843 | 0,170171 | 0,2802145 |
| PKC-delta_  | -0,15902 | -0,050856 | -3,52424 | 0,004808 | 0,01947   |
| 14-3-3_beta | -0,17231 | -0,020808 | -2,84679 | 0,01598  | 0,0448519 |
| B7-H4       | -0,17286 | -0,049555 | -2,91179 | 0,01423  | 0,0413515 |
| RIP         | -0,17423 | -0,038769 | -0,94825 | 0,363495 | 0,4775705 |
| MEK1        | -0,1799  | 0,170994  | -1,37431 | 0,196868 | 0,3117081 |
| DUSP4       | -0,18444 | 0,128881  | -1,47938 | 0,167273 | 0,2794674 |
| INPP4b      | -0,19089 | -0,024663 | -3,62402 | 0,004039 | 0,0178147 |
| p44-42-MA   | -0,19152 | -0,17336  | -1,28421 | 0,225621 | 0,3461398 |
| SHP-2_pY5   | -0,19254 | -0,09438  | -2,0873  | 0,061084 | 0,1289559 |
| CD4         | -0,20334 | 0,03085   | -2,55706 | 0,026776 | 0,063593  |
| CD134       | -0,20466 | 0,02215   | -2,95002 | 0,013292 | 0,0393039 |
| MYH11       | -0,20505 | -0,080303 | -1,09766 | 0,295948 | 0,4188231 |
| DM-Histon   | -0,21518 | 0,048536  | -2,76747 | 0,018408 | 0,0505211 |
| ER-alpha    | -0,21616 | 0,056836  | -3,38394 | 0,006153 | 0,0240053 |
| MIF         | -0,21648 | -0,062072 | -2,56651 | 0,02633  | 0,0631408 |
| G6PD        | -0,21778 | -0,142741 | -1,51267 | 0,158728 | 0,2703856 |
| A-Raf       | -0,21779 | 0,051285  | -1,71144 | 0,115192 | 0,2061771 |
| Wee1        | -0,21884 | 0,105018  | -1,02382 | 0,328047 | 0,4487363 |
| PD-L1       | -0,21999 | -0,036177 | -4,263   | 0,001355 | 0,0089284 |
| IGFBP2      | -0,2265  | -0,005399 | -1,78229 | 0,102466 | 0,1888741 |
| Beclin      | -0,23185 | 0,016681  | -3,53411 | 0,004726 | 0,01947   |
| FoxO3a      | -0,23736 | -6,74E-04 | -2,86391 | 0,015499 | 0,044098  |
| XBP1        | -0,24793 | 0,016132  | -4,894   | 4,85E-04 | 0,0049924 |

|             |          |           |          |          |           |
|-------------|----------|-----------|----------|----------|-----------|
| cdc25C      | -0,04292 | 0,229565  | -0,47012 | 0,65319  | 0,7430087 |
| ATM_pS19    | -0,04503 | 0,019368  | -0,75503 | 0,475937 | 0,5762568 |
| N-Cadherin  | -0,05146 | -0,053096 | -0,97553 | 0,363205 | 0,4600599 |
| ZAP-70      | -0,05551 | 0,105245  | -0,78236 | 0,460763 | 0,5634078 |
| MSH6        | -0,05754 | -0,095416 | -0,59024 | 0,574397 | 0,6779627 |
| beta-Caten  | -0,05824 | 0,037597  | -0,58706 | 0,576405 | 0,6779627 |
| Cyclin_D1   | -0,0589  | -0,140117 | -0,90985 | 0,394464 | 0,4920839 |
| Glutamate   | -0,05912 | -0,161659 | -1,01008 | 0,347548 | 0,444789  |
| Chk1_pS29   | -0,06366 | -0,024299 | -0,88828 | 0,405158 | 0,5018846 |
| JNK2        | -0,0644  | -0,003338 | -1,11781 | 0,302133 | 0,3990735 |
| Raptor      | -0,07018 | 0,094162  | -1,1847  | 0,276466 | 0,3711125 |
| CD134       | -0,07033 | 0,1474    | -1,07888 | 0,317957 | 0,413344  |
| DM-Histon   | -0,07749 | 0,178097  | -1,21892 | 0,264059 | 0,3603457 |
| Tuberin_pI  | -0,08047 | 0,030326  | -1,523   | 0,173486 | 0,2628894 |
| GCLM        | -0,08184 | -0,007694 | -1,31115 | 0,232966 | 0,3288146 |
| Creb        | -0,08273 | 0,029571  | -1,46449 | 0,188359 | 0,2819681 |
| Jagged1     | -0,08358 | -0,255073 | -1,56374 | 0,163774 | 0,2498952 |
| OCT4        | -0,08438 | 0,083166  | -1,61517 | 0,152237 | 0,2379901 |
| MSI2        | -0,08455 | 0,189506  | -1,42272 | 0,199681 | 0,2918411 |
| p27-Kip-1   | -0,08616 | -0,17866  | -1,44399 | 0,19384  | 0,2864007 |
| HER3        | -0,08715 | -0,144546 | -1,5632  | 0,163899 | 0,2498952 |
| IGFBP2      | -0,08762 | 0,127348  | -0,93491 | 0,382307 | 0,4793395 |
| Sifn11      | -0,09708 | -0,066141 | -1,05563 | 0,327722 | 0,4216005 |
| c-Jun_pS73  | -0,09713 | -0,261039 | -1,35224 | 0,220177 | 0,3143565 |
| Rictor      | -0,10149 | -0,15851  | -1,69216 | 0,136386 | 0,2173371 |
| BRD4        | -0,10243 | -0,010294 | -1,44056 | 0,194772 | 0,2864007 |
| TFR3        | -0,10351 | 0,423692  | -0,59613 | 0,570677 | 0,6776791 |
| PKC-delta_  | -0,10618 | 0,01554   | -1,94196 | 0,095138 | 0,1631877 |
| PMS2        | -0,1069  | 0,14136   | -1,28062 | 0,242886 | 0,3389432 |
| Jak2        | -0,10903 | 3,33E-04  | -1,77367 | 0,12132  | 0,2011138 |
| p70S6K_pT   | -0,10932 | 0,066268  | -0,88584 | 0,406384 | 0,5018846 |
| Smad3       | -0,11093 | -0,04749  | -1,06217 | 0,324952 | 0,4202255 |
| GCN5L2      | -0,11127 | -0,141842 | -1,10175 | 0,30858  | 0,4054211 |
| SHP-2_pY5   | -0,11372 | -0,005081 | -1,81284 | 0,114661 | 0,1916666 |
| CD4         | -0,11859 | 0,126065  | -1,40431 | 0,204861 | 0,2976512 |
| Ets-1       | -0,11913 | 0,029213  | -2,19915 | 0,065532 | 0,1181149 |
| AMPK-a2_1   | -0,11918 | -0,25196  | -1,38655 | 0,209974 | 0,3032958 |
| D-a-Tubulin | -0,12001 | -0,021247 | -1,47906 | 0,18455  | 0,2779508 |
| PTEN        | -0,1206  | 0,391667  | -2,1152  | 0,07401  | 0,1315135 |
| Cdc2_pY15   | -0,12447 | 0,146667  | -2,01365 | 0,08575  | 0,1502142 |
| 53BP1       | -0,12579 | -0,537412 | -0,87951 | 0,409567 | 0,503299  |
| MMP2        | -0,12896 | -0,006025 | -2,28913 | 0,057534 | 0,1052666 |
| TAZ         | -0,13101 | -0,016504 | -1,67688 | 0,139403 | 0,2270208 |
| PAK4        | -0,13335 | -0,206457 | -2,56304 | 0,038818 | 0,0767051 |
| Rad51       | -0,14224 | 0,123587  | -2,51801 | 0,041397 | 0,0798835 |
| Granzyme-   | -0,14226 | 0,287889  | -1,94506 | 0,094712 | 0,1631877 |
| C-Raf       | -0,1492  | 0,027571  | -2,73584 | 0,03038  | 0,0635929 |
| VEGFR-2     | -0,15015 | -0,258649 | -2,51138 | 0,041792 | 0,0800201 |
| PD-L1       | -0,15136 | 0,053002  | -2,54202 | 0,04     | 0,0777962 |
| VASP        | -0,15443 | -0,79474  | -1,73271 | 0,128679 | 0,2102227 |
| Glutaminsae | -0,16944 | 0,03487   | -2,42971 | 0,046984 | 0,0885875 |
| 14-3-3_beta | -0,17243 | 0,016716  | -2,63356 | 0,035111 | 0,0705078 |
| XBP1        | -0,17389 | 0,114646  | -2,80976 | 0,027382 | 0,0583048 |
| IRF-1       | -0,17441 | 0,032658  | -2,67768 | 0,032982 | 0,0678885 |
| MYH11       | -0,17671 | -0,018565 | -3,17057 | 0,016645 | 0,0387865 |
| INPP4b      | -0,18093 | 0,022965  | -3,00863 | 0,02077  | 0,046217  |
| FoxO3a      | -0,18691 | 0,081383  | -3,20605 | 0,015864 | 0,0373192 |
| Axl         | -0,18778 | 0,175097  | -3,47248 | 0,011124 | 0,0283261 |
| P-Cadherin  | -0,19236 | -0,038015 | -3,31283 | 0,013744 | 0,0332818 |
| Wee1_pS6    | -0,19312 | 0,054334  | -3,72218 | 0,008052 | 0,0228591 |
| eEF2K       | -0,19548 | -0,047663 | -1,28135 | 0,242646 | 0,3389432 |
| PEA15       | -0,19758 | -0,070949 | -1,24298 | 0,255622 | 0,354712  |
| EGFR        | -0,19836 | -0,358619 | -1,20859 | 0,267753 | 0,363379  |
| Atg3        | -0,19938 | 0,20625   | -2,87195 | 0,025102 | 0,0543879 |
| Claudin-7   | -0,20193 | -0,300118 | -3,44577 | 0,011522 | 0,0290396 |
| PEA15_pS1   | -0,20226 | -0,212926 | -1,44046 | 0,194799 | 0,2864007 |
| Smad1       | -0,20614 | -0,031447 | -3,39845 | 0,012265 | 0,030293  |
| Beclin      | -0,20638 | 0,082546  | -3,28545 | 0,014257 | 0,0341886 |
| AR          | -0,20926 | 0,202032  | -4,06792 | 0,005227 | 0,0161384 |

|             |          |           |          |          |           |
|-------------|----------|-----------|----------|----------|-----------|
| PDHK1       | -0,24969 | -0,141532 | -4,83918 | 5,29E-04 | 0,0052289 |
| PR          | -0,25538 | 0,031221  | -4,62549 | 7,46E-04 | 0,0063553 |
| Sox2        | -0,27523 | 0,266721  | -1,20916 | 0,252109 | 0,3797007 |
| TTF1        | -0,27763 | 0,059937  | -4,58585 | 7,96E-04 | 0,0065523 |
| Collagen_V  | -0,28817 | -0,072339 | -3,15669 | 0,009201 | 0,0304905 |
| Gys_pS641   | -0,29197 | -0,221008 | -4,19661 | 0,001515 | 0,0093546 |
| TFRC        | -0,29611 | 0,24353   | -1,45362 | 0,174154 | 0,2848743 |
| MSI2        | -0,32677 | -0,02712  | -5,08369 | 3,60E-04 | 0,004157  |
| B-Raf_pS44  | -0,33541 | -0,001932 | -2,50787 | 0,029219 | 0,0680857 |
| SDHA        | -0,34936 | -0,159111 | -4,4032  | 0,001074 | 0,0079908 |
| Stat3_pY7C  | -0,35056 | -0,137707 | -3,70164 | 0,003529 | 0,0164203 |
| Pdcd4       | -0,35882 | -0,201283 | -2,09119 | 0,060675 | 0,1289559 |
| HSP27_pS8   | -0,36439 | 0,019929  | -2,68632 | 0,021274 | 0,0547365 |
| AR          | -0,36478 | 0,029133  | -3,98232 | 0,002177 | 0,0122401 |
| Fibronectin | -0,36594 | -0,081243 | -0,67256 | 0,515194 | 0,6254047 |
| Glutaminas  | -0,38097 | -0,175164 | -1,99715 | 0,071316 | 0,1432118 |
| ATM         | -0,3847  | 0,220743  | -2,75482 | 0,018829 | 0,0511061 |
| SOD2        | -0,39075 | -0,00217  | -5,75394 | 1,31E-04 | 0,0021542 |
| p70S6K_pT   | -0,39572 | -0,191915 | -2,10826 | 0,058912 | 0,1276423 |
| B-Raf       | -0,39896 | -0,012151 | -3,33268 | 0,006736 | 0,0241119 |
| ULK1_pS75   | -0,42069 | -0,005227 | -4,72419 | 6,36E-04 | 0,0060253 |
| LDHA        | -0,44425 | -0,041709 | -2,82167 | 0,016712 | 0,0463804 |
| Cyclin_B1   | -0,44665 | 0,056019  | -4,26203 | 0,001358 | 0,0089284 |
| Gys         | -0,46584 | -0,262499 | -6,48289 | 4,67E-05 | 9,61E-04  |
| Axl         | -0,48951 | -0,112747 | -5,70622 | 1,40E-04 | 0,0021659 |
| Cox-IV      | -0,51711 | -0,001632 | -4,23952 | 0,00141  | 0,0089284 |
| Mcl-1       | -0,5315  | -0,056949 | -2,00174 | 0,070759 | 0,1432118 |
| Myosin-IIa  | -0,56759 | -0,042934 | -3,00941 | 0,011957 | 0,0364621 |
| Atg3        | -0,5694  | -0,139995 | -7,22159 | 1,77E-05 | 4,90E-04  |
| PLK1        | -0,58795 | -0,05959  | -3,76235 | 0,003177 | 0,0153978 |
| PI3K-p85    | -0,63576 | 0,037165  | -9,3692  | 1,48E-06 | 1,22E-04  |
| TRIM25      | -0,65172 | -0,111768 | -3,25323 | 0,007752 | 0,0269689 |
| Granzyme-   | -0,67573 | -0,179623 | -7,87182 | 7,92E-06 | 3,26E-04  |
| S6_pS240    | -0,68602 | -0,198127 | -1,49949 | 0,162064 | 0,2741772 |
| PTEN        | -0,731   | -0,134067 | -4,24212 | 0,001404 | 0,0089284 |
| PKC-alpha   | -0,73215 | -0,187465 | -3,91269 | 0,002452 | 0,0131676 |
| AMPK_pT1    | -0,78377 | -0,133669 | -3,97227 | 0,002215 | 0,0122401 |
| S6_pS235    | -0,80664 | -0,269325 | -1,32602 | 0,211876 | 0,3312243 |
| Stat3       | -0,89634 | -0,433704 | -3,59133 | 0,004276 | 0,0185294 |
| PAR         | -0,90248 | 1,00175   | -1,54287 | 0,151303 | 0,2631822 |
| Heregulin   | -0,93558 | -0,049425 | -5,06575 | 3,70E-04 | 0,004157  |
| STAT5-alpha | -0,95745 | -0,111603 | -6,36315 | 5,50E-05 | 0,0010269 |
| PDGFR-b     | -2,77677 | -1,172098 | -30,5446 | 6,21E-12 | 1,53E-09  |

|            |          |           |          |          |           |
|------------|----------|-----------|----------|----------|-----------|
| PREX1      | -0,2105  | 0,01283   | -2,29758 | 0,056836 | 0,1047657 |
| Rab11      | -0,22434 | -0,153641 | -2,10942 | 0,074633 | 0,1316734 |
| MIF        | -0,23139 | -0,023785 | -4,21668 | 0,004365 | 0,0141847 |
| eIF4E_pS2C | -0,23782 | 0,008209  | -4,27932 | 0,004049 | 0,0133362 |
| ULK1_pS75  | -0,24075 | 0,194529  | -3,39095 | 0,012387 | 0,030293  |
| RPA32_pS4  | -0,24076 | -0,363868 | -2,55644 | 0,039186 | 0,0768163 |
| p70-S6K1   | -0,24881 | -0,016118 | -3,88946 | 0,006518 | 0,0196337 |
| SOD2       | -0,25126 | 0,166774  | -4,31333 | 0,003889 | 0,0131586 |
| RBM15      | -0,25367 | 0,095418  | -4,00354 | 0,005657 | 0,0172507 |
| ER-alpha   | -0,2694  | 0,072059  | -4,38667 | 0,003566 | 0,0127663 |
| B-Raf_pS44 | -0,27987 | 0,104569  | -3,51451 | 0,010528 | 0,0273731 |
| A-Raf      | -0,29433 | 0,052879  | -4,72652 | 0,002412 | 0,0099295 |
| HSP70      | -0,29789 | -0,329619 | -2,71675 | 0,03121  | 0,0647802 |
| Cyclin_B1  | -0,30724 | 0,237113  | -4,47017 | 0,003235 | 0,0122912 |
| ATM        | -0,31496 | 0,346519  | -2,63756 | 0,034912 | 0,0705078 |
| TTF1       | -0,31568 | 0,097674  | -5,23531 | 0,001385 | 0,0065509 |
| b-Actin    | -0,33762 | -0,255878 | -4,66094 | 0,002598 | 0,0104183 |
| Cox-IV     | -0,37275 | 0,197812  | -4,62509 | 0,002706 | 0,0106087 |
| eEF2       | -0,37502 | -0,023708 | -3,48264 | 0,010977 | 0,028242  |
| B-Raf      | -0,39284 | 0,078568  | -7,40208 | 1,85E-04 | 0,0013065 |
| PLK1       | -0,40314 | 0,179577  | -5,07954 | 0,001635 | 0,0073431 |
| PI3K-p85   | -0,41028 | 0,311163  | -5,98445 | 6,51E-04 | 0,0034941 |
| c-Myc      | -0,41846 | -0,261359 | -4,65506 | 0,002615 | 0,0104183 |
| ARID1A     | -0,42873 | -0,318287 | -4,87571 | 0,002042 | 0,0085497 |
| HSP27_pS8  | -0,45719 | 0,043754  | -4,29815 | 0,00396  | 0,0132169 |
| DUSP4      | -0,46174 | 0,002738  | -8,67448 | 7,00E-05 | 6,40E-04  |
| Rad50      | -0,49539 | -0,364531 | -4,59453 | 0,002802 | 0,0108141 |
| Merlin     | -0,4973  | -0,364996 | -4,13384 | 0,004824 | 0,0152748 |
| Myosin-IIa | -0,51024 | 0,115317  | -3,59979 | 0,009423 | 0,0255765 |
| TRIM25     | -0,51024 | 0,115317  | -3,59979 | 0,009423 | 0,0255765 |
| NF-kB-p65  | -0,51796 | -0,210527 | -8,6935  | 6,90E-05 | 6,40E-04  |
| FAK_pY397  | -0,54151 | -0,02003  | -7,45072 | 1,78E-04 | 0,0013065 |
| Connexin-4 | -0,54986 | -0,005134 | -6,74757 | 3,22E-04 | 0,0019426 |
| IRS1       | -0,56784 | -0,091901 | -9,31209 | 4,49E-05 | 4,52E-04  |
| Sox2       | -0,57945 | 0,144242  | -7,32754 | 1,97E-04 | 0,0013138 |
| Gab2       | -0,60218 | -0,972387 | -9,2849  | 4,58E-05 | 4,52E-04  |
| PKC-alpha  | -0,71892 | -0,019783 | -12,4502 | 7,07E-06 | 1,03E-04  |
| p16_INK4a  | -0,93593 | -1,065797 | -14,4963 | 2,63E-06 | 4,65E-05  |
| Heregulin  | -1,02453 | 0,101335  | -18,0143 | 6,35E-07 | 1,57E-05  |
| PDGFR-b    | -1,08412 | 0,449338  | -19,4359 | 3,85E-07 | 1,06E-05  |
| E-Cadherin | -1,36551 | -1,085202 | -4,44167 | 0,003344 | 0,0124122 |
| Cox2       | -2,24692 | -0,342198 | -34,5506 | 8,46E-09 | 9,01E-07  |
| PAR        | -2,5017  | 0,239122  | -25,1183 | 7,06E-08 | 2,90E-06  |

Subtype A vs. MGT7

| Protein     | logFC    | AveExpr   | t        | P.Value  | adj.P.Val |
|-------------|----------|-----------|----------|----------|-----------|
| E-Cadherin  | 4,077979 | 1,851072  | 13,59682 | 3,49E-08 | 1,73E-06  |
| P-Met_pY1   | 3,905679 | -0,561518 | 8,062376 | 6,39E-06 | 8,49E-05  |
| RSK         | 2,093323 | -0,522712 | 17,44287 | 2,58E-09 | 2,12E-07  |
| CDK1        | 2,055225 | -0,044656 | 6,337862 | 5,75E-05 | 3,23E-04  |
| ARID1A      | 1,990081 | 0,479544  | 5,962624 | 9,74E-05 | 4,63E-04  |
| Claudin-7   | 1,973089 | 1,311605  | 7,625586 | 1,08E-05 | 1,03E-04  |
| Rb_pS807_   | 1,75058  | -0,113102 | 5,758942 | 1,31E-04 | 5,87E-04  |
| Cox2        | 1,715259 | 0,635351  | 2,416961 | 0,034359 | 0,0606194 |
| Bim         | 1,640005 | 0,183023  | 4,214912 | 0,001475 | 0,0044977 |
| ACC_pS79    | 1,626265 | -0,122915 | 4,328442 | 0,001221 | 0,0039119 |
| Connexin-4  | 1,604578 | 0,22003   | 6,424789 | 5,10E-05 | 3,02E-04  |
| Rad50       | 1,484122 | 0,301541  | 7,84141  | 8,30E-06 | 8,92E-05  |
| FASN        | 1,27253  | -0,140903 | 10,44204 | 5,14E-07 | 1,50E-05  |
| ACC1        | 1,219935 | 0,109605  | 6,171473 | 7,24E-05 | 0,000389  |
| PAR         | 1,188793 | 0,62152   | 2,029457 | 0,067524 | 0,1030536 |
| 53BP1       | 1,147778 | 0,719624  | 3,536219 | 0,004722 | 0,01178   |
| GCN5L2      | 1,090841 | 0,203806  | 9,041021 | 2,13E-06 | 4,04E-05  |
| 4E-BP1_pS1  | 1,053014 | 0,270633  | 8,000785 | 6,87E-06 | 8,49E-05  |
| Src_pY416   | 0,971179 | -0,178759 | 4,825654 | 5,44E-04 | 0,0019745 |
| IRS1        | 0,9708   | 0,188377  | 2,63659  | 0,023276 | 0,0438869 |
| p90RSK_pT   | 0,943846 | -0,085843 | 8,897744 | 2,49E-06 | 4,39E-05  |
| ATM         | 0,881887 | -0,009546 | 6,501237 | 4,59E-05 | 2,91E-04  |
| PARP        | 0,817498 | 0,237528  | 7,295409 | 1,62E-05 | 1,29E-04  |
| Akt_pS473   | 0,808969 | -0,222421 | 3,568563 | 0,004462 | 0,0114804 |
| Notch1      | 0,793386 | -0,282907 | 3,537211 | 0,004713 | 0,01178   |
| c-Jun_pS73  | 0,789696 | 0,239301  | 6,09568  | 8,06E-05 | 4,06E-04  |
| beta-Caten  | 0,750219 | 0,225981  | 4,315244 | 0,001248 | 0,0039119 |
| c-Myc       | 0,71508  | 0,21677   | 7,349606 | 1,52E-05 | 1,25E-04  |
| C-Raf_pS33  | 0,619967 | 0,059052  | 4,13766  | 0,001679 | 0,0050585 |
| PAK1        | 0,590111 | -0,114631 | 1,930564 | 0,079928 | 0,1189295 |
| RPA32_pS4   | 0,583537 | -0,063773 | 6,43274  | 5,04E-05 | 3,02E-04  |
| PI3K-p85    | 0,578939 | -0,183689 | 8,546006 | 3,67E-06 | 5,90E-05  |
| HES1        | 0,575656 | 0,231788  | 1,256218 | 0,23527  | 0,3026657 |
| eIF4E       | 0,550199 | -0,025588 | 6,108774 | 7,91E-05 | 4,06E-04  |
| Cdc2_pY15   | 0,5306   | 0,01096   | 4,900449 | 4,83E-04 | 0,0018066 |
| Bid         | 0,520625 | 0,129638  | 3,549615 | 0,004612 | 0,0117445 |
| RBM15       | 0,504069 | 0,490142  | 0,941461 | 0,366848 | 0,4441738 |
| Src_pY527   | 0,495044 | 0,037893  | 2,216448 | 0,048859 | 0,0807804 |
| HER3        | 0,484719 | 0,504228  | 2,581701 | 0,025662 | 0,0473706 |
| eEF2        | 0,478251 | 0,01111   | 2,996859 | 0,01225  | 0,0254274 |
| AMPK_alph   | 0,444753 | -0,170229 | 4,313517 | 0,001251 | 0,0039119 |
| Smad3       | 0,437212 | 0,147645  | 5,818215 | 1,20E-04 | 5,59E-04  |
| Akt_pT308   | 0,433648 | -0,06235  | 1,968314 | 0,074962 | 0,1129002 |
| PKC-b-II_pS | 0,427428 | -0,185356 | 3,442722 | 0,005562 | 0,0134699 |
| Caspase-3   | 0,427404 | 0,154166  | 5,252264 | 2,79E-04 | 0,0011333 |
| Bcl-xL      | 0,420292 | 0,182625  | 3,147138 | 0,009378 | 0,020498  |
| c-Kit       | 0,411685 | 0,198267  | 5,25049  | 2,80E-04 | 0,0011333 |
| Wee1_pS6    | 0,40153  | 0,142258  | 4,645249 | 7,26E-04 | 0,0023914 |
| Paxillin    | 0,385944 | -0,017222 | 6,852062 | 2,87E-05 | 2,07E-04  |
| Histone-H3  | 0,366995 | 0,057748  | 2,099147 | 0,059892 | 0,0954415 |
| Shc_pY317   | 0,365979 | -0,208821 | 3,786027 | 0,003059 | 0,0084894 |
| HSP70       | 0,360941 | 0,055002  | 4,667178 | 7,01E-04 | 0,0023714 |
| 14-3-3_zeta | 0,354151 | -0,00447  | 3,090472 | 0,010371 | 0,0222748 |
| FAK         | 0,34764  | -0,018272 | 3,843346 | 0,002771 | 0,0077789 |
| PRAS40_pT   | 0,342914 | -0,107622 | 1,167702 | 0,267813 | 0,3392298 |
| VASP        | 0,3403   | -0,031485 | 1,781609 | 0,102633 | 0,1491199 |
| Lck         | 0,333933 | 0,086966  | 2,531525 | 0,028053 | 0,0504822 |
| XRCC1       | 0,333274 | -0,004986 | 3,395825 | 0,006041 | 0,0142101 |
| Sox2        | 0,332648 | 0,156197  | 1,460706 | 0,172288 | 0,2325423 |
| DM-K9-His1  | 0,311906 | -0,030843 | 4,64969  | 7,21E-04 | 0,0023914 |
| Caspase-7   | 0,31119  | -0,113361 | 2,543016 | 0,027486 | 0,0499203 |
| Chk2_pT68   | 0,310569 | -0,020476 | 3,082131 | 0,010526 | 0,0224127 |
| Myt1        | 0,30976  | -0,038003 | 3,199444 | 0,008547 | 0,019191  |
| Merlin      | 0,309137 | 0,081024  | 1,768057 | 0,104967 | 0,1516185 |
| DJ-1        | 0,298587 | 0,133255  | 3,448291 | 0,005508 | 0,0134699 |
| WIPI1       | 0,293815 | 0,245293  | 1,298115 | 0,221019 | 0,288845  |

subtype B vs. MGT 7

| Protein     | logFC    | AveExpr   | t        | P.Value  | adj.P.Val |
|-------------|----------|-----------|----------|----------|-----------|
| P-Met_pY1   | 4,697158 | -0,938778 | 74,92326 | 1,46E-10 | 3,62E-08  |
| RSK         | 2,683463 | -0,625353 | 54,86156 | 1,05E-09 | 1,29E-07  |
| Notch1      | 2,347481 | 0,476448  | 45,8311  | 3,26E-09 | 2,03E-07  |
| Rb_pS807_   | 2,18387  | -0,235072 | 39,93065 | 7,76E-09 | 3,83E-07  |
| ACC_pS79    | 2,067445 | -0,213028 | 23,94125 | 1,93E-07 | 4,51E-06  |
| CDK1        | 1,97376  | -0,541948 | 38,45157 | 9,84E-09 | 4,05E-07  |
| Fibronectin | 1,530955 | 1,205599  | 9,730992 | 4,91E-05 | 2,53E-04  |
| Akt_pS473   | 1,368307 | -0,06332  | 13,46006 | 6,88E-06 | 6,30E-05  |
| Bim         | 1,28209  | -0,389545 | 24,19337 | 1,81E-07 | 4,51E-06  |
| FASN        | 1,22342  | -0,448012 | 14,95374 | 3,60E-06 | 3,58E-05  |
| HES1        | 1,220882 | 0,493327  | 21,1277  | 4,21E-07 | 6,94E-06  |
| ACC1        | 1,207576 | -0,163979 | 21,16275 | 4,17E-07 | 6,94E-06  |
| Src_pY416   | 1,029589 | -0,355606 | 18,66111 | 9,13E-07 | 1,11E-05  |
| PKA-a       | 0,985279 | 0,443107  | 19,2266  | 7,59E-07 | 1,04E-05  |
| ATM         | 0,951623 | -0,160116 | 8,725685 | 9,39E-05 | 4,37E-04  |
| p90RSK_pT   | 0,890456 | -0,323807 | 10,28256 | 3,53E-05 | 2,03E-04  |
| Connexin-4  | 0,867729 | -0,57217  | 10,61205 | 2,92E-05 | 1,76E-04  |
| Pdcd4       | 0,811065 | 0,126594  | 11,36853 | 1,93E-05 | 1,22E-04  |
| PI3K-p85    | 0,804418 | -0,174715 | 12,15262 | 1,29E-05 | 9,34E-05  |
| Akt_pT308   | 0,800977 | 0,063433  | 9,42914  | 5,93E-05 | 2,93E-04  |
| STAT5-alpha | 0,729843 | 0,553266  | 12,95944 | 8,68E-06 | 6,70E-05  |
| IGFRb       | 0,673653 | 0,876255  | 13,66633 | 6,27E-06 | 5,96E-05  |
| ARID1A      | 0,658924 | -0,75335  | 7,53846  | 2,20E-04 | 8,26E-04  |
| LRP6_pS14   | 0,641061 | 0,293243  | 11,98267 | 1,40E-05 | 9,88E-05  |
| Shc_pY317   | 0,607148 | -0,143969 | 9,197737 | 6,87E-05 | 3,33E-04  |
| PAK1        | 0,585795 | -0,245972 | 11,11462 | 2,21E-05 | 1,36E-04  |
| AMPK_alph   | 0,582495 | -0,184621 | 10,14781 | 3,82E-05 | 2,15E-04  |
| XRCC1       | 0,525977 | 0,037921  | 6,388376 | 5,63E-04 | 0,0018298 |
| Cdc2_pY15   | 0,520045 | -0,11114  | 7,186166 | 2,90E-04 | 0,0010225 |
| Wee1        | 0,506484 | 0,139087  | 8,132213 | 1,42E-04 | 6,15E-04  |
| GCN5L2      | 0,502351 | -0,38729  | 5,969369 | 8,19E-04 | 0,0023802 |
| Mcl-1       | 0,499886 | 0,347536  | 7,515356 | 2,24E-04 | 8,26E-04  |
| 4E-BP1_pS1  | 0,495256 | -0,29377  | 8,153183 | 1,40E-04 | 6,15E-04  |
| AMPK_pT1    | 0,486715 | 0,997887  | 4,799688 | 0,002606 | 0,0060716 |
| Bid         | 0,484994 | -0,00533  | 3,802381 | 0,00811  | 0,0147343 |
| PRAS40_pT   | 0,479974 | -0,100203 | 8,915874 | 8,26E-05 | 3,93E-04  |
| RIP         | 0,462285 | 0,106685  | 1,844754 | 0,112134 | 0,1465453 |
| Caspase-7   | 0,449403 | -0,098329 | 8,343125 | 1,22E-04 | 5,59E-04  |
| PTEN        | 0,448663 | 0,163963  | 9,436692 | 5,90E-05 | 2,93E-04  |
| PKC-b-II_pS | 0,433918 | -0,274718 | 6,139734 | 7,02E-04 | 0,0021397 |
| Tuberin     | 0,409148 | 0,22117   | 4,123747 | 0,005535 | 0,0110677 |
| Bad_pS112   | 0,405622 | -0,121011 | 5,186137 | 0,001744 | 0,0045816 |
| beta-Caten  | 0,402134 | -0,146554 | 6,042147 | 7,66E-04 | 0,0023086 |
| Paxillin    | 0,39243  | -0,097537 | 7,902622 | 1,68E-04 | 6,86E-04  |
| mTOR        | 0,387562 | -0,066634 | 7,952201 | 1,62E-04 | 6,77E-04  |
| PARP        | 0,373534 | -0,207213 | 3,540071 | 0,011208 | 0,0197741 |
| Chk2_pT68   | 0,368514 | -0,05347  | 5,439334 | 0,001355 | 0,0035975 |
| eIF4E       | 0,350416 | -0,265501 | 6,760994 | 4,10E-04 | 0,0013834 |
| Rad50       | 0,350054 | -0,702708 | 3,519606 | 0,0115   | 0,0201447 |
| Myt1        | 0,325818 | -0,095952 | 5,030162 | 0,002046 | 0,0050525 |
| HER2_pY12   | 0,319297 | 0,094711  | 4,232412 | 0,004881 | 0,0101314 |
| WIPI1       | 0,294558 | 0,181634  | 3,502838 | 0,011745 | 0,0204291 |
| IRS1        | 0,286879 | -0,433787 | 3,969903 | 0,006632 | 0,0130014 |
| STING       | 0,27701  | 0,433335  | 2,789512 | 0,029918 | 0,0461539 |
| 14-3-3_zeta | 0,271302 | -0,131449 | 5,086183 | 0,001931 | 0,0049116 |
| Stathmin    | 0,267642 | -0,142018 | 4,610754 | 0,003195 | 0,0072399 |
| COG3        | 0,26554  | 0,083359  | 3,802082 | 0,008113 | 0,0147343 |
| Bak         | 0,250272 | -0,090717 | 3,83869  | 0,007761 | 0,0143458 |
| YB1_pS102   | 0,248613 | -0,039595 | 3,901744 | 0,007194 | 0,0135278 |
| Raptor      | 0,247552 | -0,032933 | 4,238046 | 0,00485  | 0,0101314 |
| SDHA        | 0,245534 | 0,121946  | 3,433324 | 0,012824 | 0,0216948 |
| Caspase-3   | 0,238695 | -0,052312 | 3,961999 | 0,006695 | 0,0130208 |
| FAK         | 0,23667  | -0,160703 | 2,734696 | 0,032237 | 0,0485526 |
| DM-K9-His1  | 0,231501 | -0,147139 | 3,087097 | 0,020079 | 0,0324157 |
| C-Raf       | 0,225082 | -0,122143 | 4,418151 | 0,003954 | 0,0085667 |
| IGFBP2      | 0,218739 | 0,004805  | 1,89843  | 0,103935 | 0,1372836 |

|             |          |           |          |          |           |
|-------------|----------|-----------|----------|----------|-----------|
| PAICS       | 0,290497 | 0,348264  | 1,187647 | 0,260186 | 0,3312678 |
| Bak         | 0,263146 | -0,025579 | 3,326898 | 0,006821 | 0,0157461 |
| DUSP4       | 0,259141 | 0,04823   | 2,047837 | 0,065427 | 0,1010029 |
| Bad_pS112   | 0,25529  | -0,15551  | 3,110719 | 0,010004 | 0,021676  |
| HER2_pY12   | 0,252006 | 0,109319  | 1,324687 | 0,212352 | 0,2813903 |
| p38_pT180   | 0,244549 | 0,152977  | 3,217093 | 0,008283 | 0,0187706 |
| p27_pT198   | 0,242723 | 0,08116   | 2,729391 | 0,019731 | 0,0386796 |
| Rictor      | 0,231252 | 0,003434  | 2,248235 | 0,04622  | 0,077663  |
| Wee1        | 0,230033 | 0,023405  | 1,07217  | 0,306787 | 0,3827096 |
| mTOR        | 0,227446 | -0,113079 | 2,147609 | 0,055074 | 0,0883326 |
| EGFR_pY11   | 0,220239 | -0,020761 | 4,315428 | 0,001247 | 0,0039119 |
| C-Raf       | 0,217194 | -0,079488 | 2,02889  | 0,06759  | 0,1030536 |
| Stathmin    | 0,215478 | -0,126303 | 2,337273 | 0,039539 | 0,0682952 |
| Elk1_pS38   | 0,212288 | -0,025692 | 3,610465 | 0,004147 | 0,0107835 |
| ATR_pS42E   | 0,211757 | 0,022845  | 3,414579 | 0,005845 | 0,0138809 |
| TUFM        | 0,210513 | 0,137065  | 2,61265  | 0,024288 | 0,0454489 |
| Raptor      | 0,208643 | -0,010756 | 2,375235 | 0,036984 | 0,0647868 |
| ER-alpha_p  | 0,208631 | 0,195351  | 2,953036 | 0,013245 | 0,0270372 |
| Bax         | 0,196227 | 0,010879  | 0,440265 | 0,66834  | 0,7219861 |
| MEK1_pS2    | 0,195554 | 0,025863  | 3,328584 | 0,006801 | 0,0157461 |
| Chk1_pS29   | 0,18635  | -0,063817 | 2,978386 | 0,01266  | 0,0260589 |
| A-Raf       | 0,185335 | -0,02201  | 1,464524 | 0,171263 | 0,2324288 |
| b-Actin     | 0,169691 | 0,160934  | 1,054955 | 0,314248 | 0,3900466 |
| Tyro3       | 0,168276 | -0,014282 | 3,054048 | 0,011065 | 0,0233592 |
| TAZ         | 0,155878 | 0,184933  | 1,815747 | 0,096962 | 0,1425579 |
| GCLM        | 0,150735 | -0,011929 | 3,187728 | 0,008726 | 0,0194173 |
| EGFR        | 0,147047 | -0,047453 | 1,591412 | 0,140054 | 0,1943441 |
| NAPSIN-A    | 0,146958 | -0,080924 | 1,935652 | 0,079242 | 0,1186224 |
| UBAC1       | 0,143835 | -0,04358  | 1,511115 | 0,159169 | 0,2172084 |
| NF-kB-p65   | 0,138268 | -0,007839 | 0,931245 | 0,371876 | 0,4480651 |
| eIF4G       | 0,133138 | 0,068523  | 1,787907 | 0,101565 | 0,1484409 |
| PDK1        | 0,131864 | -0,009512 | 2,086559 | 0,061208 | 0,0959359 |
| YB1_pS102   | 0,130538 | -0,081959 | 1,322557 | 0,213036 | 0,2813903 |
| MSH6        | 0,117776 | 0,164421  | 0,748335 | 0,470083 | 0,5425722 |
| AMPK-a2_f   | 0,116284 | -0,086014 | 1,096294 | 0,296559 | 0,3737254 |
| Notch3      | 0,116038 | 0,05209   | 2,258598 | 0,04539  | 0,0767905 |
| eIF4E_pS2C  | 0,113283 | 0,00323   | 1,683749 | 0,12059  | 0,1708614 |
| RIP         | 0,100239 | -0,088672 | 0,438797 | 0,669372 | 0,7219861 |
| p16_INK4a   | 0,100033 | 0,299067  | 0,373217 | 0,716137 | 0,7657393 |
| PI3K-p110-  | 0,09905  | -0,062117 | 2,304663 | 0,04187  | 0,0718194 |
| Pdcd4       | 0,093523 | -0,283527 | 0,544331 | 0,597163 | 0,658033  |
| p27-Kip-1   | 0,092997 | -0,05325  | 1,861886 | 0,089752 | 0,1327472 |
| Tuberin     | 0,092488 | 0,051353  | 0,816781 | 0,431528 | 0,5075587 |
| XPF         | 0,08906  | -0,131189 | 1,587525 | 0,14093  | 0,1944682 |
| Aurora-B    | 0,087973 | -0,024936 | 0,885671 | 0,394897 | 0,4689401 |
| Rab11       | 0,085186 | -0,054335 | 0,738243 | 0,475947 | 0,5467861 |
| FOXO3a_p1   | 0,083044 | -0,073689 | 1,614393 | 0,134967 | 0,1883432 |
| YAP         | 0,081174 | -0,057171 | 1,089494 | 0,299416 | 0,3754096 |
| IGFBP2      | 0,079857 | -0,061101 | 0,593631 | 0,564863 | 0,6341875 |
| PEA15_pS1   | 0,070285 | -0,002652 | 0,382432 | 0,709486 | 0,7619261 |
| Ets-1       | 0,06179  | 0,040532  | 1,220786 | 0,247895 | 0,3172537 |
| p53         | 0,06094  | 0,003464  | 0,455481 | 0,657695 | 0,7156414 |
| MDM2_pS:    | 0,05173  | -0,168872 | 0,477976 | 0,642101 | 0,7017648 |
| 4E-BP1      | 0,050315 | 0,164505  | 0,250601 | 0,80678  | 0,8408209 |
| Cyclin_D1   | 0,045221 | 0,016667  | 0,563676 | 0,584375 | 0,6472668 |
| TIGAR       | 0,039477 | 0,060019  | 0,334432 | 0,744394 | 0,7824057 |
| D-a-Tubulin | 0,037758 | -0,056284 | 0,627801 | 0,543051 | 0,6152922 |
| AR          | 0,018574 | -0,040568 | 0,197774 | 0,846858 | 0,8727302 |
| JNK2        | 0,011897 | -0,004291 | 0,121746 | 0,905314 | 0,9240183 |
| clAP        | 0,002476 | -0,046568 | 0,050399 | 0,960715 | 0,96587   |
| b-Catenin_  | 2,89E-05 | 0,070485  | 3,62E-04 | 0,999718 | 0,9997176 |
| Akt         | -0,00926 | -0,07518  | -0,0488  | 0,96196  | 0,96587   |
| mTOR_pS2    | -0,01366 | -0,141743 | -0,08319 | 0,935205 | 0,9467033 |
| PKA-a       | -0,0203  | -0,164673 | -0,16907 | 0,868835 | 0,8904658 |
| PLC-gamma:  | -0,02153 | 0,030147  | -0,33716 | 0,742393 | 0,7824057 |
| Sfn11       | -0,02255 | -0,09016  | -0,25396 | 0,804249 | 0,8408209 |
| c-Abl       | -0,03094 | -0,081375 | -0,58467 | 0,570663 | 0,6377998 |
| U-Histone-  | -0,03409 | -0,00702  | -0,3345  | 0,744342 | 0,7824057 |
| MSI2        | -0,03581 | -0,080021 | -0,57022 | 0,580082 | 0,645407  |

|             |          |           |          |          |           |
|-------------|----------|-----------|----------|----------|-----------|
| Tyro3       | 0,216841 | -0,021857 | 4,213207 | 0,00499  | 0,0102712 |
| Lck         | 0,214116 | -0,057782 | 2,749367 | 0,031598 | 0,0478822 |
| PI3K-p110-  | 0,206945 | -0,018991 | 4,176665 | 0,005205 | 0,0105379 |
| XPF         | 0,206908 | -0,079911 | 4,263259 | 0,004712 | 0,0100325 |
| eEF2        | 0,20647  | -0,256304 | 2,235929 | 0,064486 | 0,0899894 |
| MSI2        | 0,206411 | 0,073123  | 3,944605 | 0,006835 | 0,0130871 |
| IGF1R_pY1   | 0,203077 | 0,268704  | 3,15669  | 0,018323 | 0,0301385 |
| p21         | 0,196038 | -0,030453 | 3,725141 | 0,008911 | 0,0159489 |
| UBAC1       | 0,191785 | -0,046192 | 3,92717  | 0,006979 | 0,0132594 |
| EGFR_pY11   | 0,189005 | -0,087553 | 3,705302 | 0,00913  | 0,0162243 |
| mTOR_pS2    | 0,186438 | -0,018703 | 2,700916 | 0,033761 | 0,0502354 |
| Histone-H3  | 0,184841 | -0,131616 | 1,711879 | 0,135249 | 0,1695762 |
| AR          | 0,174091 | 0,04869   | 3,060825 | 0,020789 | 0,0333433 |
| ATR_pS42E   | 0,169321 | -0,048818 | 2,39691  | 0,051438 | 0,0734402 |
| Chk1_pS29   | 0,166521 | -0,116373 | 2,190569 | 0,068747 | 0,0953957 |
| Elk1_pS38:  | 0,164145 | -0,100894 | 3,258162 | 0,016054 | 0,0267929 |
| Wee1_pS6    | 0,163351 | -0,088256 | 1,790287 | 0,121102 | 0,1557927 |
| SLC1A5      | 0,161474 | 0,51657   | 2,657443 | 0,035836 | 0,0526878 |
| MAPK_pT2    | 0,155805 | 0,083148  | 1,900907 | 0,103572 | 0,1372836 |
| c-Kit       | 0,15214  | -0,047281 | 1,584196 | 0,161743 | 0,1997521 |
| GATA6       | 0,150994 | 0,039006  | 3,044622 | 0,02124  | 0,0338469 |
| FOXO3a_p1   | 0,140839 | -0,05713  | 2,660797 | 0,035671 | 0,0526878 |
| S6_pS240_   | 0,12355  | 0,445644  | 1,144789 | 0,293792 | 0,3406887 |
| YAP         | 0,122936 | -0,049824 | 2,363145 | 0,053928 | 0,0765528 |
| Bax         | 0,122129 | -0,076393 | 2,416638 | 0,050038 | 0,0718576 |
| p27_pT198   | 0,121086 | -0,04478  | 2,287947 | 0,059933 | 0,0841099 |
| c-Abl       | 0,118939 | 0,015301  | 2,172045 | 0,070568 | 0,0973764 |
| Smad3       | 0,11821  | -0,139148 | 0,958144 | 0,373195 | 0,4267554 |
| A-Raf       | 0,108797 | -0,10837  | 1,961889 | 0,095005 | 0,1275342 |
| c-Jun_pS73  | 0,106923 | -0,34266  | 1,761632 | 0,126097 | 0,1605466 |
| GCLM        | 0,094828 | -0,078361 | 1,893753 | 0,104626 | 0,1374601 |
| PLC-gamma:  | 0,093728 | 0,104     | 1,902321 | 0,103365 | 0,1372836 |
| C-Raf_pS3:  | 0,08842  | -0,395141 | 1,749967 | 0,128188 | 0,1623709 |
| RPA32_pS4   | 0,08104  | -0,492589 | 0,878326 | 0,411911 | 0,4667061 |
| MEK1_pS2    | 0,071031 | -0,091517 | 1,206356 | 0,27089  | 0,3171079 |
| DJ-1        | 0,060863 | -0,074525 | 0,935965 | 0,383663 | 0,4367036 |
| Bcl-xL      | 0,052279 | -0,129883 | 1,046435 | 0,333722 | 0,3833918 |
| U-Histone-  | 0,037331 | 0,043273  | 0,397148 | 0,704325 | 0,7531093 |
| Akt         | 0,032079 | -0,04836  | 0,486619 | 0,642945 | 0,6965234 |
| IR-b        | 0,031783 | 0,316294  | 0,225578 | 0,828649 | 0,8457697 |
| Aurora-B    | 0,030001 | -0,078913 | 0,331881 | 0,750711 | 0,7919369 |
| Sox2        | 0,028433 | -0,098909 | 0,367761 | 0,725056 | 0,7686211 |
| Src_pY527   | 0,022202 | -0,353822 | 0,418916 | 0,689144 | 0,7400808 |
| D-a-Tubulin | 0,017926 | -0,076422 | 0,328062 | 0,753462 | 0,7919369 |
| clAP        | 0,014827 | -0,039698 | 0,238545 | 0,819006 | 0,8393962 |
| MDM2_pS:    | 0,009568 | -0,205456 | 0,088181 | 0,932461 | 0,9400729 |
| PKC-delta_  | 0,009284 | -0,030647 | 0,158939 | 0,878675 | 0,8894786 |
| NAPSIN-A    | 0,003427 | -0,199106 | 0,033002 | 0,974691 | 0,9746906 |
| eIF4E_pS2C  | 0,002538 | -0,087934 | 0,0336   | 0,974232 | 0,9746906 |
| Ets-1       | -0,00842 | -0,015073 | -0,16254 | 0,875957 | 0,8894786 |
| Rictor      | -0,01333 | -0,193772 | -0,24154 | 0,816783 | 0,8393962 |
| JNK2        | -0,01507 | -0,023068 | -0,25977 | 0,803298 | 0,8336747 |
| DUSP4       | -0,01817 | -0,174693 | -0,30705 | 0,768672 | 0,8044994 |
| p38_pT180   | -0,01984 | -0,059012 | -0,276   | 0,791352 | 0,824742  |
| PAICS       | -0,02576 | 0,095129  | -0,24407 | 0,814904 | 0,8393962 |
| Sfn11       | -0,03327 | -0,091667 | -0,36891 | 0,72424  | 0,7686211 |
| 14-3-3_beta | -0,03672 | -0,03757  | -0,60925 | 0,563605 | 0,6159749 |
| p53         | -0,04621 | -0,07412  | -0,70626 | 0,505217 | 0,5595896 |
| PDK1        | -0,05047 | -0,14768  | -0,74929 | 0,480636 | 0,5371812 |
| TUFM        | -0,05267 | -0,066776 | -0,69002 | 0,514708 | 0,5675577 |
| ER-alpha_f  | -0,05461 | -0,008113 | -0,71014 | 0,502968 | 0,5595896 |
| c-Myc       | -0,06045 | -0,404563 | -0,68072 | 0,520194 | 0,5710574 |
| MERIT40_f   | -0,07311 | 0,13586   | -0,5356  | 0,610552 | 0,6643448 |
| FoxM1       | -0,07797 | 0,059247  | -0,85536 | 0,42359  | 0,4777478 |
| Claudin-7   | -0,07815 | -0,34963  | -1,25117 | 0,255196 | 0,3001594 |
| Notch3      | -0,08199 | -0,092046 | -1,52618 | 0,175339 | 0,2133429 |
| CD20        | -0,08368 | 0,172599  | -1,58464 | 0,161643 | 0,1997521 |
| RBM15       | -0,08377 | 0,02746   | -1,53398 | 0,173451 | 0,2120923 |
| p27-Kip-1   | -0,08378 | -0,179609 | -1,35737 | 0,221134 | 0,2625964 |

|             |          |           |          |          |           |
|-------------|----------|-----------|----------|----------|-----------|
| 14-3-3_beta | -0,0366  | -0,045484 | -0,61735 | 0,549669 | 0,6199463 |
| Smad1       | -0,0399  | 0,026621  | -0,35583 | 0,728754 | 0,775872  |
| Jagged1     | -0,04015 | 0,160316  | -0,19628 | 0,847997 | 0,8727302 |
| PKC-delta_  | -0,04355 | -0,07185  | -0,89381 | 0,390713 | 0,4684759 |
| Heregulin   | -0,04479 | -0,211387 | -0,24282 | 0,812649 | 0,8433794 |
| MMP2        | -0,0474  | 0,052953  | -0,98348 | 0,346679 | 0,426019  |
| IRF-1       | -0,05491 | 0,04805   | -0,81101 | 0,434694 | 0,5088597 |
| STING       | -0,06749 | 0,211912  | -0,10141 | 0,921061 | 0,9362228 |
| LRP6_pS14   | -0,0724  | -0,15063  | -0,94618 | 0,36454  | 0,4441738 |
| MAPK_pT2    | -0,1042  | -0,095589 | -0,54094 | 0,599423 | 0,658033  |
| Rad51       | -0,12134 | 0,229754  | -0,88946 | 0,392944 | 0,4688757 |
| PDK1_pS24   | -0,12291 | 0,169696  | -1,70236 | 0,116972 | 0,1679774 |
| p70-S6K1    | -0,12351 | 0,129352  | -1,00516 | 0,336594 | 0,4156942 |
| p21         | -0,12913 | -0,253731 | -1,41581 | 0,18474  | 0,246653  |
| Creb        | -0,13563 | 0,050198  | -2,6463  | 0,022878 | 0,0434674 |
| IGF1R_pY1   | -0,14277 | 0,030049  | -2,1569  | 0,054193 | 0,0874881 |
| IR-b        | -0,15029 | 0,174263  | -0,7185  | 0,487553 | 0,5575264 |
| eEF2K       | -0,15551 | 0,19831   | -0,71006 | 0,492563 | 0,5606592 |
| PTEN        | -0,16174 | -0,237569 | -0,94207 | 0,366548 | 0,4441738 |
| TTF1        | -0,16512 | 0,039481  | -2,9145  | 0,014186 | 0,0284879 |
| OCT4        | -0,17705 | 0,042496  | -3,68896 | 0,003618 | 0,00961   |
| FoxO3a      | -0,1888  | -0,009503 | -2,29361 | 0,04269  | 0,0727205 |
| PEA15       | -0,1898  | 0,194478  | -1,43683 | 0,178817 | 0,2400428 |
| GATA6       | -0,18983 | -0,206902 | -2,21413 | 0,049057 | 0,0807804 |
| Jak2        | -0,19383 | 0,01048   | -2,52848 | 0,028205 | 0,0504822 |
| ER-alpha    | -0,19453 | 0,052902  | -3,15482 | 0,009251 | 0,0204008 |
| XBP1        | -0,19696 | 0,006864  | -4,28252 | 0,001317 | 0,0040676 |
| SDHA        | -0,19726 | -0,186767 | -2,58089 | 0,025699 | 0,0473706 |
| PREX1       | -0,19958 | 0,220191  | -2,42653 | 0,033783 | 0,0600322 |
| Mcl-1       | -0,20119 | -0,117005 | -0,75625 | 0,465519 | 0,5398267 |
| JNK_pT183   | -0,20163 | 0,079326  | -2,08504 | 0,061368 | 0,0959359 |
| FoxM1       | -0,21101 | -0,066612 | -2,36236 | 0,037832 | 0,065806  |
| B-Raf_pS44  | -0,21397 | -0,024011 | -1,6566  | 0,126047 | 0,176895  |
| COG3        | -0,21831 | -0,254581 | -1,31567 | 0,215261 | 0,282817  |
| INPP4b      | -0,2184  | -0,019661 | -3,74148 | 0,003304 | 0,0090666 |
| CD134       | -0,23267 | 0,027245  | -3,45868 | 0,005409 | 0,0133595 |
| MERIT40_f   | -0,24118 | -0,017598 | -2,18225 | 0,051857 | 0,0842679 |
| p38_MAPK    | -0,24121 | 0,080272  | -1,68139 | 0,121056 | 0,1708614 |
| N-Cadherin  | -0,25227 | -0,047889 | -1,68977 | 0,119409 | 0,1704862 |
| HER3_pY12   | -0,2527  | 0,035728  | -3,6702  | 0,003738 | 0,0098224 |
| Glutamate   | -0,26454 | 0,049489  | -2,943   | 0,013484 | 0,0272993 |
| CD20        | -0,28029 | -0,006524 | -3,7106  | 0,003485 | 0,0094595 |
| SLC1A5      | -0,28694 | 0,184915  | -1,26037 | 0,233826 | 0,3023821 |
| PD-L1       | -0,29215 | -0,023057 | -5,77988 | 1,27E-04 | 5,80E-04  |
| ZAP-70      | -0,29337 | 0,082267  | -3,03637 | 0,011418 | 0,0239012 |
| Beclin      | -0,30749 | 0,030434  | -4,99438 | 4,16E-04 | 0,0015821 |
| P-Cadherin  | -0,30802 | 0,109523  | -3,43219 | 0,005666 | 0,0135884 |
| Rab25       | -0,31623 | -0,072747 | -4,07211 | 0,001876 | 0,005516  |
| Mnk1        | -0,31864 | 0,168786  | -2,7471  | 0,019118 | 0,037778  |
| cdc25C      | -0,32948 | 0,176967  | -2,05459 | 0,064672 | 0,1004658 |
| ATM_pS19    | -0,33532 | 0,002799  | -7,52054 | 1,23E-05 | 1,12E-04  |
| MIF         | -0,34484 | -0,038735 | -4,13008 | 0,001701 | 0,0050618 |
| G6PD        | -0,35346 | -0,118073 | -2,2265  | 0,048009 | 0,080123  |
| PR          | -0,35651 | 0,049608  | -6,40147 | 5,26E-05 | 3,02E-04  |
| FAK_pY397   | -0,35757 | 0,306504  | -0,85553 | 0,410652 | 0,4853166 |
| DM-Histon   | -0,36085 | 0,075023  | -4,6957  | 6,69E-04 | 0,0023286 |
| Gab2        | -0,36871 | 0,167786  | -1,26068 | 0,233719 | 0,3023821 |
| Tuberin_pT  | -0,37218 | 0,042294  | -4,68225 | 6,84E-04 | 0,0023466 |
| STAT5-alpha | -0,40104 | -0,212767 | -2,65449 | 0,022546 | 0,0431703 |
| CD4         | -0,41325 | 0,069014  | -5,17645 | 3,14E-04 | 0,0012104 |
| ERCC5       | -0,419   | -0,018824 | -3,96449 | 0,002252 | 0,0065448 |
| GSK-3a-b_f  | -0,42261 | 0,040381  | -1,99485 | 0,071644 | 0,1085653 |
| VEGFR-2     | -0,42756 | 0,070836  | -2,55996 | 0,026672 | 0,0488002 |
| Fibronectin | -0,4348  | -0,068722 | -0,80195 | 0,439698 | 0,5122902 |
| Rictor_pT1  | -0,44919 | -0,011196 | -2,89756 | 0,014621 | 0,0291246 |
| SOD2        | -0,44982 | 0,008572  | -6,68145 | 3,60E-05 | 2,41E-04  |
| BRD4        | -0,45613 | -0,010498 | -6,96157 | 2,49E-05 | 1,86E-04  |
| PAK4        | -0,46359 | 0,132529  | -4,87975 | 4,99E-04 | 0,0018389 |
| Hexokinase  | -0,46452 | 0,025019  | -7,4514  | 1,34E-05 | 1,18E-04  |

|            |          |           |          |          |           |
|------------|----------|-----------|----------|----------|-----------|
| PR         | -0,09048 | 0,287013  | -1,77088 | 0,124464 | 0,1592882 |
| Atg3       | -0,09665 | 0,16516   | -0,84611 | 0,428357 | 0,4809286 |
| CD134      | -0,09835 | 0,158608  | -1,7218  | 0,133374 | 0,1680785 |
| TIGAR      | -0,09866 | -0,031474 | -1,83394 | 0,113861 | 0,1472443 |
| Stat3      | -0,10554 | 0,514912  | -2,07753 | 0,080657 | 0,1100685 |
| eIF4G      | -0,1067  | -0,10443  | -1,39794 | 0,209231 | 0,2508744 |
| AMPK-a2_j  | -0,11848 | -0,252242 | -1,3651  | 0,21882  | 0,2611044 |
| Rab11      | -0,11934 | -0,195639 | -1,11099 | 0,307043 | 0,3543911 |
| XBP1       | -0,12292 | 0,094257  | -2,48741 | 0,045337 | 0,0654866 |
| TAZ        | -0,12631 | -0,018387 | -1,53397 | 0,173452 | 0,2120923 |
| ERCC5      | -0,12795 | 0,247226  | -1,15828 | 0,28864  | 0,3362926 |
| b-Catenin_ | -0,12941 | -0,007183 | -1,28495 | 0,243892 | 0,2882362 |
| IRF-1      | -0,13009 | 0,014927  | -2,03833 | 0,085258 | 0,1157078 |
| Heregulin  | -0,13374 | -0,254981 | -2,65088 | 0,036161 | 0,0528507 |
| OCT4       | -0,13794 | 0,10459   | -2,72506 | 0,032665 | 0,0488979 |
| FoxO3a     | -0,13835 | 0,061959  | -2,61028 | 0,03824  | 0,0555612 |
| Cyclin_D1  | -0,14334 | -0,106339 | -2,13945 | 0,073894 | 0,1013985 |
| E-Cadherin | -0,14595 | -1,573026 | -0,44404 | 0,671813 | 0,7246191 |
| MMP2       | -0,14934 | 0,002127  | -2,8531  | 0,027448 | 0,0426387 |
| B-Raf_pS44 | -0,15844 | 0,055994  | -2,77263 | 0,030613 | 0,0466748 |
| G6PD       | -0,16386 | 0,072803  | -1,40337 | 0,207682 | 0,2502312 |
| Creb       | -0,16469 | 0,062356  | -3,28144 | 0,015578 | 0,0261749 |
| Smad1      | -0,17317 | -0,044635 | -2,91578 | 0,025225 | 0,0396852 |
| MSH6       | -0,18649 | -0,043836 | -2,31558 | 0,057649 | 0,0813681 |
| TTF1       | -0,20318 | 0,052673  | -4,3103  | 0,004466 | 0,0095913 |
| INPP4b     | -0,20844 | 0,033968  | -3,0191  | 0,021972 | 0,0347891 |
| HSP70      | -0,20846 | -0,365392 | -1,98403 | 0,092073 | 0,1242738 |
| Jak2       | -0,21235 | 0,04166   | -3,77507 | 0,008384 | 0,015115  |
| DM-Histon  | -0,22316 | 0,236368  | -3,83638 | 0,007783 | 0,0143458 |
| PD-L1      | -0,22352 | 0,081866  | -4,11713 | 0,005577 | 0,0110677 |
| GSK-3a-b_j | -0,22529 | 0,250974  | -4,24644 | 0,004803 | 0,0101314 |
| p44-42-MA  | -0,22796 | 0,137085  | -4,1135  | 0,005601 | 0,0110677 |
| N-Cadherin | -0,23219 | 0,019196  | -4,78009 | 0,002661 | 0,0061419 |
| PEA15_pS1  | -0,23367 | -0,200361 | -1,60621 | 0,156849 | 0,1956648 |
| cdc25C     | -0,23414 | 0,306053  | -1,84101 | 0,112729 | 0,1465474 |
| Stat3_pY7C | -0,23629 | 0,395886  | -5,00692 | 0,002095 | 0,0051244 |
| ZAP-70     | -0,23925 | 0,178742  | -3,47374 | 0,012184 | 0,0208984 |
| Rictor_pT1 | -0,24618 | 0,208616  | -5,06932 | 0,001965 | 0,0049116 |
| ER-alpha   | -0,24776 | 0,063404  | -4,6993  | 0,002902 | 0,0066368 |
| Rab25      | -0,25567 | 0,032587  | -4,47119 | 0,003726 | 0,0081454 |
| Rad51      | -0,26234 | 0,171627  | -3,13177 | 0,018932 | 0,0307647 |
| HER3_pY12  | -0,26425 | 0,083933  | -4,52409 | 0,003514 | 0,0078198 |
| EGFR       | -0,2702  | -0,329884 | -1,42435 | 0,201796 | 0,2443318 |
| ATM_pS19   | -0,2758  | 0,111675  | -5,53879 | 0,001229 | 0,0033368 |
| Beclin     | -0,28202 | 0,112803  | -5,74327 | 0,001011 | 0,0028377 |
| HER3       | -0,28705 | -0,064588 | -4,18439 | 0,005159 | 0,0105306 |
| PDHK1      | -0,2881  | 0,170248  | -4,58055 | 0,003302 | 0,0074152 |
| NF-kB-p65  | -0,29675 | -0,299014 | -4,50104 | 0,003605 | 0,0079502 |
| SOD2       | -0,31034 | 0,190406  | -5,81696 | 9,43E-04 | 0,0027094 |
| p38_MAPK   | -0,31181 | 0,090537  | -5,08912 | 0,001925 | 0,0049116 |
| JNK_pT183  | -0,3144  | 0,055657  | -6,22359 | 6,51E-04 | 0,0020354 |
| Hexokinase | -0,32089 | 0,212545  | -5,7514  | 0,001003 | 0,0028377 |
| CD4        | -0,3285  | 0,210027  | -3,89766 | 0,007229 | 0,0135278 |
| Axl        | -0,34568 | 0,238258  | -6,02639 | 7,77E-04 | 0,0023137 |
| p70-S6K1   | -0,34604 | 0,022775  | -6,00728 | 7,91E-04 | 0,0023264 |
| Tuberin_pT | -0,34867 | 0,137605  | -6,78324 | 4,02E-04 | 0,0013797 |
| B7-H4      | -0,35764 | 0,196086  | -7,28396 | 2,68E-04 | 9,60E-04  |
| MIF        | -0,35975 | 0,027556  | -7,53573 | 2,21E-04 | 8,26E-04  |
| 53BP1      | -0,36826 | -0,440424 | -2,78543 | 0,030084 | 0,0461539 |
| Granzyme-  | -0,36875 | 0,378485  | -4,9506  | 0,002222 | 0,0053806 |
| PKM2       | -0,36988 | 0,193229  | -5,66983 | 0,001084 | 0,0030082 |
| Collagen_v | -0,38936 | 0,359319  | -3,44023 | 0,012712 | 0,0216539 |
| Mnk1       | -0,39088 | 0,194965  | -5,10519 | 0,001894 | 0,0049116 |
| Merlin     | -0,39201 | -0,407113 | -3,48727 | 0,011977 | 0,0206882 |
| PAR        | -0,41043 | -0,597385 | -3,94903 | 0,006799 | 0,0130871 |
| b-Actin    | -0,41302 | -0,225716 | -5,63988 | 0,001115 | 0,0030611 |
| BRD4       | -0,41397 | 0,114319  | -6,88796 | 3,69E-04 | 0,001283  |
| PDK1_pS24  | -0,42338 | 0,016233  | -6,74715 | 4,14E-04 | 0,0013834 |
| ULK1_pS75  | -0,42631 | 0,268754  | -6,28088 | 6,19E-04 | 0,0019593 |

|            |          |           |          |          |           |
|------------|----------|-----------|----------|----------|-----------|
| Atg3       | -0,46667 | -0,158672 | -4,70623 | 6,58E-04 | 0,0023222 |
| p44-42-MA  | -0,48204 | -0,120539 | -3,22509 | 0,008167 | 0,0186778 |
| B7-H4      | -0,49165 | 0,008408  | -8,41028 | 4,28E-06 | 6,21E-05  |
| PKM2       | -0,5135  | -0,004977 | -2,67252 | 0,021835 | 0,0421338 |
| SHP-2_pY5  | -0,52558 | -0,033828 | -5,68291 | 1,46E-04 | 6,45E-04  |
| PDHK1      | -0,53004 | -0,09056  | -9,83574 | 9,32E-07 | 2,09E-05  |
| ULK1_pS75  | -0,60626 | 0,028512  | -6,83676 | 2,93E-05 | 2,07E-04  |
| B-Raf      | -0,62237 | 0,028469  | -5,20918 | 2,98E-04 | 0,001188  |
| TFAM       | -0,63463 | 0,208887  | -3,86464 | 0,002672 | 0,0076739 |
| Axl        | -0,64741 | -0,084037 | -7,38521 | 1,45E-05 | 1,24E-04  |
| S6_pS240   | -0,69437 | -0,196608 | -1,51629 | 0,157871 | 0,2166337 |
| WIPI2      | -0,71436 | 0,135735  | -3,69479 | 0,003582 | 0,00961   |
| Collagen_V | -0,71767 | 0,005751  | -7,86435 | 8,08E-06 | 8,92E-05  |
| PKC-alpha  | -0,72069 | -0,189548 | -3,85003 | 0,00274  | 0,0077785 |
| MEK1       | -0,73088 | 0,271173  | -5,64225 | 1,55E-04 | 6,73E-04  |
| Stat3_pY7C | -0,7391  | -0,067062 | -7,84177 | 8,30E-06 | 8,92E-05  |
| NDRG1_pT   | -0,74879 | 0,569197  | -2,08564 | 0,061304 | 0,0959359 |
| Caveolin-1 | -0,77492 | 0,094879  | -2,19405 | 0,050804 | 0,0831027 |
| HSP27_pS8  | -0,81976 | 0,102724  | -6,4187  | 5,14E-05 | 3,02E-04  |
| PMS2       | -0,83606 | 0,28608   | -7,01512 | 2,32E-05 | 1,79E-04  |
| IGFRb      | -0,85389 | -0,226573 | -8,50891 | 3,82E-06 | 5,90E-05  |
| LDHA       | -0,86714 | 0,035181  | -6,00222 | 9,21E-05 | 4,46E-04  |
| TSC1       | -0,88574 | -0,037883 | -6,09638 | 8,05E-05 | 4,06E-04  |
| Atg7       | -0,89547 | 0,079798  | -6,81611 | 3,01E-05 | 2,07E-04  |
| Granzyme-  | -0,90222 | -0,138443 | -10,3752 | 5,48E-07 | 1,50E-05  |
| AMPK_pT1   | -0,98203 | -0,097621 | -5,5402  | 1,81E-04 | 7,69E-04  |
| Glutamina: | -0,9895  | -0,064521 | -5,18491 | 3,10E-04 | 0,0012104 |
| LC3A-B     | -1,00888 | 0,145092  | -9,86349 | 9,06E-07 | 2,09E-05  |
| Gys_pS641  | -1,07199 | -0,079185 | -15,6395 | 8,13E-09 | 5,02E-07  |
| YAP_pS127  | -1,07328 | -0,052866 | -6,0415  | 8,70E-05 | 4,30E-04  |
| TFRC       | -1,08901 | 0,387694  | -5,3443  | 2,43E-04 | 0,0010155 |
| Stat3      | -1,17491 | -0,383054 | -4,7085  | 6,56E-04 | 0,0023222 |
| MYH11      | -1,17492 | 0,096037  | -6,28033 | 6,22E-05 | 3,42E-04  |
| p70S6K_pT  | -1,23478 | -0,039359 | -6,59755 | 4,03E-05 | 2,62E-04  |
| Cyclin_B1  | -1,30657 | 0,212369  | -12,9819 | 5,63E-08 | 2,32E-06  |
| Gys        | -1,34938 | -0,101855 | -18,948  | 1,07E-09 | 1,33E-07  |
| Cox-IV     | -1,37704 | 0,154718  | -11,6248 | 1,74E-07 | 6,15E-06  |
| Myosin-IIa | -1,42752 | 0,113416  | -7,65622 | 1,04E-05 | 1,03E-04  |
| PLK1       | -1,44787 | 0,096759  | -9,42633 | 1,42E-06 | 2,91E-05  |
| TRIM25     | -1,51165 | 0,044582  | -7,62208 | 1,08E-05 | 1,03E-04  |
| S6_pS235   | -1,63268 | -0,119137 | -2,68167 | 0,021482 | 0,041779  |
| MCT4       | -2,06196 | -0,369449 | -8,01736 | 6,74E-06 | 8,49E-05  |
| PDGFR-b    | -4,12457 | -0,927044 | -45,2463 | 9,13E-14 | 2,25E-11  |

|            |          |           |          |          |           |
|------------|----------|-----------|----------|----------|-----------|
| SHP-2_pY5  | -0,44676 | 0,128133  | -7,35017 | 2,55E-04 | 9,25E-04  |
| LDHA       | -0,44762 | 0,476085  | -8,05559 | 1,50E-04 | 6,38E-04  |
| Glutamate- | -0,45124 | -0,004813 | -8,2162  | 1,34E-04 | 6,00E-04  |
| eEF2K      | -0,4514  | 0,054703  | -3,15247 | 0,018425 | 0,0301385 |
| PREX1      | -0,45485 | 0,110573  | -4,87965 | 0,002394 | 0,0056852 |
| 4E-BP1     | -0,47156 | -0,159597 | -7,88824 | 1,69E-04 | 6,86E-04  |
| Cox2       | -0,47292 | -1,051796 | -7,54332 | 2,19E-04 | 8,26E-04  |
| P-Cadherin | -0,4765  | 0,075639  | -5,44259 | 0,00135  | 0,0035975 |
| Jagged1    | -0,48167 | -0,095837 | -9,99258 | 4,19E-05 | 2,20E-04  |
| MEK1       | -0,48188 | 0,58004   | -7,78747 | 1,83E-04 | 7,27E-04  |
| Caveolin-1 | -0,4844  | 0,438262  | -4,86887 | 0,002421 | 0,0056956 |
| MCT4       | -0,49846 | 1,018534  | -6,5153  | 5,04E-04 | 0,0016613 |
| PEA15      | -0,49975 | 0,049919  | -3,19957 | 0,017324 | 0,028719  |
| TFAM       | -0,52316 | 0,414235  | -6,14579 | 6,98E-04 | 0,0021397 |
| WIPI2      | -0,52497 | 0,405226  | -2,88814 | 0,026181 | 0,0409279 |
| VASP       | -0,5466  | -0,637872 | -6,32922 | 5,93E-04 | 0,001902  |
| YAP_pS127  | -0,59724 | 0,466929  | -11,6211 | 1,69E-05 | 1,16E-04  |
| B-Raf      | -0,61625 | 0,167933  | -13,0013 | 8,51E-06 | 6,70E-05  |
| Gys        | -0,69854 | 0,583061  | -13,0449 | 8,34E-06 | 6,70E-05  |
| PKC-alpha  | -0,70746 | -0,024366 | -13,1365 | 7,99E-06 | 6,70E-05  |
| VEGFR-2    | -0,73937 | -0,022961 | -13,2104 | 7,72E-06 | 6,70E-05  |
| Gys_pS641  | -0,75884 | 0,342594  | -14,9396 | 3,62E-06 | 3,58E-05  |
| PAK4       | -0,77163 | 0,048855  | -14,9624 | 3,59E-06 | 3,58E-05  |
| S6_pS235   | -0,77487 | 0,751764  | -4,92621 | 0,002279 | 0,0054662 |
| Glutamina: | -0,77798 | 0,278284  | -11,5562 | 1,75E-05 | 1,17E-04  |
| FAK_pY397  | -0,8357  | 0,097646  | -12,5867 | 1,04E-05 | 7,77E-05  |
| PMS2       | -0,87153 | 0,44721   | -10,5314 | 3,06E-05 | 1,80E-04  |
| Atg7       | -0,88232 | 0,28306   | -18,5744 | 9,40E-07 | 1,11E-05  |
| TFRC       | -0,89641 | 0,740853  | -5,06731 | 0,001969 | 0,0049116 |
| HSP27_pS8  | -0,91256 | 0,225903  | -11,3629 | 1,93E-05 | 1,22E-04  |
| p70S6K_pT  | -0,94837 | 0,401891  | -7,75291 | 1,87E-04 | 7,34E-04  |
| LC3A-B     | -1,03592 | 0,348992  | -17,8253 | 1,21E-06 | 1,36E-05  |
| TSC1       | -1,05448 | 0,054131  | -20,1759 | 5,62E-07 | 8,67E-06  |
| MYH11      | -1,14658 | 0,369384  | -21,5179 | 3,76E-07 | 6,94E-06  |
| Cyclin_B1  | -1,16717 | 0,581082  | -23,7859 | 2,01E-07 | 4,51E-06  |
| NDRG1_pT   | -1,23107 | 0,443207  | -22,2046 | 3,09E-07 | 6,36E-06  |
| Cox-IV     | -1,23267 | 0,541782  | -18,8318 | 8,63E-07 | 1,11E-05  |
| PLK1       | -1,26306 | 0,523547  | -19,7823 | 6,35E-07 | 9,23E-06  |
| Myosin-IIa | -1,37016 | 0,459287  | -10,0217 | 4,12E-05 | 2,20E-04  |
| TRIM25     | -1,37016 | 0,459287  | -10,0217 | 4,12E-05 | 2,20E-04  |
| p16_INK4a  | -1,65739 | -0,777213 | -27,0609 | 8,95E-08 | 2,76E-06  |
| Gab2       | -1,68271 | -0,540172 | -27,826  | 7,52E-08 | 2,65E-06  |
| PDGFR-b    | -2,43191 | 0,988457  | -45,7566 | 3,29E-09 | 2,03E-07  |
