# Supplementary material for: Modeling Heterogeneity of Triple‐Negative Breast Cancer Uncovers a Novel Combinatorial Treatment Overcoming Primary Drug Resistance
Source: PubMed Central journal article supplement (PMC7856896; doi:10.1002/advs.202003049), 2020-12-16
Supplement: ADVS-8-2003049-s010.pdf [file ADVS-8-2003049-s010.pdf]

**Table S9:** In vitro tumorigenic capacity of the *MMTV-R26<sup>Met</sup>* cell lines, as determined by the tumor sphere assay - Statistical analysis was performed by One-way ANOVA followed by Tukey test.

|       |          | Passage 1 |            |            |             |            |               |            |            | Passage 3  |            |           |            |
|-------|----------|-----------|------------|------------|-------------|------------|---------------|------------|------------|------------|------------|-----------|------------|
|       |          | MGT2      |            | MGT4       |             | MGT11      |               | MGT13      |            | MGT11      |            | MGT13     |            |
|       |          | 50-100µm  | >100µm     | 50-100µm   | >100µm      | 50-100µm   | >100µm        | 50-100µm   | >100µm     | 50-100µm   | >100µm     | 50-100µm  | >100µm     |
| MGT7  | 50-100µm | 0.034 (*) |            | 0.086 (ns) |             | 0.005 (**) |               | 0.003 (**) |            |            |            |           |            |
|       | >100µm   |           | 0.116 (ns) |            | 0.116 (ns)  |            | <0.0001 (***) |            | 0.007 (**) |            |            |           |            |
| MGT2  | 50-100µm |           |            | 0.113 (ns) |             | 0.006 (**) |               | 0.003 (**) |            |            |            |           |            |
|       | >100µm   |           |            |            | >0.999 (ns) |            | <0.0001 (***) |            | 0.008 (**) |            |            |           |            |
| MGT4  | 50-100µm |           |            |            |             | 0.055 (ns) |               | 0.008 (**) |            | 0.798 (ns) |            | 0.032 (*) |            |
|       | >100µm   |           |            |            |             |            | <0.0001 (***) |            | 0.008 (**) |            | 0.009 (**) |           | 0.021 (*)  |
| MGT11 | 50-100µm |           |            |            |             |            |               | 0.039 (*)  |            |            |            | 0.019 (*) |            |
|       | >100µm   |           |            |            |             |            |               |            | 0.036 (*)  |            |            |           | 0.198 (ns) |
