# Supplementary material for: Modeling Heterogeneity of Triple‐Negative Breast Cancer Uncovers a Novel Combinatorial Treatment Overcoming Primary Drug Resistance
Source: PubMed Central journal article supplement (PMC7856896; doi:10.1002/advs.202003049), 2020-12-16
Supplement: ADVS-8-2003049-s011.pdf [file ADVS-8-2003049-s011.pdf]

**Table S10** : Migrating capacity of the *MMTV-R26<sup>Met</sup>* cell lines - Statistical analysis was performed by One-way ANOVA followed by Tukey test.

|              | <b>MGT7</b> | <b>MGT2</b>    | <b>MGT4</b>    | <b>MGT9</b>     | <b>MGT11</b>     | <b>MGT13</b>     |
|--------------|-------------|----------------|----------------|-----------------|------------------|------------------|
| <b>MGT7</b>  |             | 0.2249<br>(ns) | 0.0178<br>(* ) | 0.0002<br>(***) | <0.0001<br>(***) | <0.0001<br>(***) |
| <b>MGT2</b>  |             |                | 0.6052<br>(ns) | 0.0139<br>(* )  | 0.0053<br>(**)   | <0.0001<br>(***) |
| <b>MGT4</b>  |             |                |                | 0.4207<br>(ns)  | 0.2363<br>(ns)   | <0.0001<br>(***) |
| <b>MGT9</b>  |             |                |                |                 | 0.9987<br>(ns)   | <0.0001<br>(***) |
| <b>MGT11</b> |             |                |                |                 |                  | 0.0002<br>(***)  |
| <b>MGT13</b> |             |                |                |                 |                  |                  |
