# Supplementary material for: Modeling Heterogeneity of Triple‐Negative Breast Cancer Uncovers a Novel Combinatorial Treatment Overcoming Primary Drug Resistance
Source: PubMed Central journal article supplement (PMC7856896; doi:10.1002/advs.202003049), 2020-12-16
Supplement: ADVS-8-2003049-s013.pdf [file ADVS-8-2003049-s013.pdf]

**Table S12:** Antibodies used in the study.

| Antibody                                | Company                 | Reference | Dilution | Used for | TritonX-100 (%) for IF |
|-----------------------------------------|-------------------------|-----------|----------|----------|------------------------|
| Estrogen receptor alpha (ER $\alpha$ )  | Santa Cruz              | sc-8005   | 1:100    | IHC      | 0.5 %                  |
| Progesteron receptor (PR)               | Santa Cruz              | sc-810    | 1:200    | IHC      | 0.5 %                  |
| Human EGFR2 (HER2)                      | Cell Signaling          | 2165      | 1:200    | IHC      | 0.2 %                  |
| MET                                     | Santa Cruz              | sc-10     | 1:50     | IHC      | 0.2 %                  |
| Ki67                                    | Cell Signaling          | 9129      | 1:400    | IHC      | 0.5 %                  |
| Ki67                                    | Dako                    | M7249     | 1:100    | IF       | 0.1 %                  |
| Krt14                                   | Covalab                 | Mab71720  | 1:500    | IF       | 0.5 %                  |
| Krt18                                   | Covalab                 | Mab20042  | 1:500    | IF       | 0.5 %                  |
| human MET                               | Assay Design            | 905-076   | 1:150    | IF       | 0.5 %                  |
| pY <sub>1234/35</sub> MET               | Cell Signaling          | 3126L     | 1:50     | IF       | 0.5 %                  |
| pH3 (S10)                               | Millipore               | 06-570    | 1 : 500  | IF       | 0.3 %                  |
| alpha-Tubulin                           | Sigma                   | T5168     | 1 : 5000 | IF       | 0.3 %                  |
| Vimentin                                | Abcam                   | Ab-8979   | 1:100    | IF       | 0.5 %                  |
| pS <sub>139</sub> H2AX ( $\gamma$ H2AX) | Cell Signaling          | 9718      | 1 : 400  | IF, WB   | 0.2 %                  |
| Actin                                   | Sigma                   | A3853     | 1:6000   | WB       |                        |
| ATM                                     | Cell Signaling          | 2873      | 1:1000   | WB       |                        |
| pS <sub>1987</sub> ATM                  | Invitrogen              | PA5-37346 | 1:1000   | WB       |                        |
| ATR                                     | Cell Signaling          | 13934     | 1:1000   | WB       |                        |
| pS <sub>428</sub> ATR                   | Cell Signaling          | 2853      | 1:1000   | WB       |                        |
| pS <sub>473</sub> AKT                   | Cell Signaling          | 9271      | 1:2000   | WB       |                        |
| BCL-XL                                  | Transduction Laboratory | B22620    | 1:500    | WB       |                        |
| BIM                                     | Santa Cruz              | sc-11425  | 1:1000   | WB       |                        |
| Cleaved-Caspase 3                       | Cell Signaling          | 9661      | 1:1000   | WB       |                        |
| CDC2 (CDK1)                             | Cell Signaling          | 28493     | 1:20000  | WB       |                        |
| pY <sub>15</sub> CDC2(CDK1)             | Cell Signaling          | 4539      | 1:1000   | WB       |                        |
| pT <sub>202/Y204</sub> ERKs             | Cell Signaling          | 9106      | 1:10000  | WB       |                        |
| pY <sub>627</sub> GAB1                  | Cell Signaling          | 3231      | 1:2000   | WB       |                        |
| MCL1                                    | Santa Cruz              | sc-819    | 1:1000   | WB       |                        |
| pS <sub>217/221</sub> MEK               | Cell Signaling          | 9121      | 1:1000   | WB       |                        |
| mouse MET                               | Santa Cruz              | sc-8057   | 1:500    | WB       |                        |
| MET <sup>25H2</sup>                     | Cell Signaling          | 3127      | 1:1000   | WB       |                        |
| human MET                               | Santa Cruz              | sc-161    | 1:1000   | WB       |                        |

|                                     |                               |             |         |      |  |
|-------------------------------------|-------------------------------|-------------|---------|------|--|
| pY <sub>1234/35</sub> MET           | Cell Signaling                | 3126        | 1:2000  | WB   |  |
| PARP                                | Cell Signaling                | 9546S       | 1:2000  | WB   |  |
| P53                                 | Novocastra                    | CM5         | 1:1000  | WB   |  |
| pS <sub>15</sub> P53                | Cell Signaling                | 9284        | 1:1000  | WB   |  |
| RB                                  | Cell Signaling                | 9313        | 1:1000  | WB   |  |
| pS <sub>795</sub> RB                | Abcam                         | Ab47474     | 1:1000  | WB   |  |
| RPA32 (B-4)                         | Santa Cruz                    | sc-271578   | 1:200   | WB   |  |
| pS <sub>33</sub> RPA32              | Bethyl                        | A300-246A   | 1 :5000 | WB   |  |
| RRM2                                | abbexa                        | Abx004031   | 1 :5000 | WB   |  |
| pY <sub>705</sub> STAT3             | Cell Signaling                | 9145S       | 1:2000  | WB   |  |
| XIAP                                | Transduction laboratory       | 610716      | 1:3000  | WB   |  |
| Goat anti-rabbit IgG-<br>peroxidase | Jackson<br>Immuno<br>Research | 115-035-144 | 1:4000  | WB   |  |
| Goat anti-mouse IgG-<br>peroxidase  | Jackson<br>Immuno<br>Research | 115-035-146 | 1:4000  | WB   |  |
| CD24-BV421<br>(clone M1/29)         | Biolegend                     | 101826      | 1:400   | FACS |  |
| CD29-FITC<br>(clone HMb1-1)         | eBioscience                   | 11-0291-82  | 1:400   | FACS |  |
| CD61-biotin<br>(clone 2C9.G3)       | eBioscience                   | 13-0611-81  | 1:400   | FACS |  |
| anti-Ki67-APC<br>(clone SolA15)     | eBioscience                   | 17-5698-82  | 1:200   | FACS |  |
| Streptavidin, APC-AF750             | Invitrogen                    | SA1027      | 1:200   | FACS |  |
| Annexin V                           | eBioscience                   | 88-8005-72  | 1:20    | FACS |  |
