# Supplementary material for: Modeling Heterogeneity of Triple‐Negative Breast Cancer Uncovers a Novel Combinatorial Treatment Overcoming Primary Drug Resistance
Source: PubMed Central journal article supplement (PMC7856896; doi:10.1002/advs.202003049), 2020-12-16
Supplement: ADVS-8-2003049-s014.pdf [file ADVS-8-2003049-s014.pdf]

**Table S13:** Drugs used for cell viability assays, with the indicated targets and the concentrations used.

| Drug                  | Company               | Target                                         | Concentration ( $\mu$ M) |
|-----------------------|-----------------------|------------------------------------------------|--------------------------|
| 3-Methyladenine (3MA) | TargetMol             | Autophagy inhibitor                            | 1mM                      |
| 5-Fluorouracil (5-FU) | Targetmol             | Thymidylate synthase (nucleotide synthesis)    | 0.4, 2, 10               |
| A-1155463             | Selleckchem/Targetmol | Bcl-xL                                         | 0.3, 1, 3, 10            |
| ABT-737               | Selleckchem           | Bcl-2,Bcl-xL,Bcl-w                             | 1, 3, 10                 |
| ABT-199               | Selleckchem           | Bcl-2                                          | 1, 3, 10                 |
| Adavosertib           | Selleckchem           | Wee1                                           | 1, 3, 10                 |
| Adavosertib(MK-1775)  | Targetmol             | Wee1                                           | 1, 3, 10                 |
| AZD6738               | Targetmol             | ATR                                            | 1, 3, 10                 |
| CB-839                | Selleckchem           | Glutaminase                                    | 1, 3, 10                 |
| Cisplatin             | MedChem Express       | DNA replication                                | 1, 3, 10                 |
| Docetaxel             | Targetmol             | Beta-tubulin (microtubule inhibitor)           | 0.4, 2, 10               |
| Doxorubicin           | Targetmol             | intercalating agent                            | 0.04, 0.2, 1             |
| Erastin               | TargetMol             | Ferroptosis inducer                            | 0,5 - 1                  |
| Ferostatin-1          | TargetMol             | Ferroptosis inhibitor                          | 10, 20, 50, 100          |
| Gefitinib             | Calbiochem            | EGFR                                           | 1, 3, 10                 |
| JNJ-7706621           | Selleckchem           | pan-Cdk, Aurora A/B                            | 1, 3, 10                 |
| LY294002              | Calbiochem            | PI3K                                           | 1, 3, 10                 |
| Necrostatin-1         | TargetMol             | Necroptosis inhibitor                          | 10, 20, 50, 100          |
| Olaparib              | TargetMol             | PARP1/PARP2                                    | 1, 3, 10                 |
| PF-431396             | Selleckchem           | Pyk2/Fak                                       | 1, 3, 10                 |
| PHA-665752            | Tocris Bioscience     | Met                                            | 0.3, 1, 3                |
| R547                  | Selleckchem/Sigma     | Cdk1/2/4                                       | 1, 3, 10                 |
| SB225022              | TargetMol             | CXCR antagonist                                | 1, 3, 10                 |
| Selumetinib           | Selleckchem           | Mek1/2                                         | 1, 3, 10                 |
| Sorafenib             | Selleckchem           | Raf-1, B-Raf, Vegfr2, Pdgfr $\beta$ , Flt3,Kit | 1, 3, 10                 |
| Staurosporine         | TargetMol             | Apoptosis inducer                              | 150nM                    |
| WEHI-539              | Apexbio               | Bcl-xL                                         | 1, 3, 10                 |
| Z-VAD-FMK             | TargetMol             | Apoptosis inhibitor                            | 10, 20, 50, 100          |
