# Supplementary material for: Modeling Heterogeneity of Triple‐Negative Breast Cancer Uncovers a Novel Combinatorial Treatment Overcoming Primary Drug Resistance
Source: PubMed Central journal article supplement (PMC7856896; doi:10.1002/advs.202003049), 2020-12-16
Supplement: ADVS-8-2003049-s015.pdf [file ADVS-8-2003049-s015.pdf]

**Table S14:** Oligonucleotides used for RT-qPCR experiments.

| Oligonucleotide (name) | Sequence (Forward)     | Sequence (Reverse)       |
|------------------------|------------------------|--------------------------|
| <i>Met</i> EXT(mouse)  | GTTCTGCTTGGCAACGAGAGCT | GGAGAATGCACTGTATTGCGTCG  |
| <i>Met</i> (mouse)     | GAATTGTCTGCCATTACAGG   | CAGCTCTTACTGTTATTGGCGC   |
| <i>Met</i> (human)     | CTGAAGCCGTTTTATGCAGC   | GCCACAGGAAAAACCCAAGTAG   |
| <i>Hgf</i>             | GTCCTGAAGGCTCAGACTTGGT | CCAGCCGTAAATACTGCAAGTGG  |
| <i>B2M</i>             | ACAGTTCCACCCGCCTCACATT | TAGAAAGACCAGTCCTTGCTGAAG |
