# Supplementary material for: Modeling Heterogeneity of Triple‐Negative Breast Cancer Uncovers a Novel Combinatorial Treatment Overcoming Primary Drug Resistance
Source: PubMed Central journal article supplement (PMC7856896; doi:10.1002/advs.202003049), 2020-12-16
Supplement: ADVS-8-2003049-s016.pdf [file ADVS-8-2003049-s016.pdf]

**Table S15:** Proliferation capacity (mitotic index) of the *MMTV-R26<sup>Met</sup>* cell lines - Statistical analysis was performed by One-way ANOVA followed by Tukey test.

|       | MGT7 | MGT2          | MGT4             | MGT9             | MGT11            | MGT13            |
|-------|------|---------------|------------------|------------------|------------------|------------------|
| MGT7  |      | 0.549<br>(ns) | <0.0001<br>(***) | <0.0001<br>(***) | <0.0001<br>(***) | <0.0001<br>(***) |
| MGT2  |      |               | <0.0001<br>(***) | <0.0001<br>(***) | <0.0001<br>(***) | <0.0001<br>(***) |
| MGT4  |      |               |                  | 0.8339<br>(ns)   | 0.6485<br>(ns)   | 0.9936<br>(ns)   |
| MGT9  |      |               |                  |                  | 0.9996<br>(ns)   | 0.9824<br>(ns)   |
| MGT11 |      |               |                  |                  |                  | 0.9121<br>(ns)   |
| MGT13 |      |               |                  |                  |                  |                  |
